# Supplementary material for: l-Proline-catalysed synthesis of 2-aryl-2H,5H-thiopyrano[2,3-b] thiochromen-5-ones from 4-hydroxydithiocoumarins and cinnamaldehyde derivatives
Source: Royal Society of Chemistry journal article supplement (doi:10.1039/d3ob02051g), 2024-01-01
Supplement: d3ob02051g1.pdf [file d3ob02051g1.pdf]

# L-Proline catalyzed synthesis of 2-aryl-2*H*,5*H*-thiopyrano[2,3-*b*]thiochromen-5-ones from 4-hydroxydithiocoumarins and cinnamaldehyde derivatives

## Electronic Supporting Information

Ahmad Ali, Simra Faraz, and Abu Taleb Khan\*

*Department of Chemistry, Indian Institute of Technology Guwahati, Guwahati-781039, Assam, India.*

E-mail: atk@iitg.ac.in

### Table of Contents:

|                                                                            |        |
|----------------------------------------------------------------------------|--------|
| 1. General information and methods.....                                    | S1     |
| 2. X-ray crystallographic data of compound <b>3e</b> .....                 | S2     |
| 3. Substrate scope.....                                                    | S3     |
| 4. Unsuccessful results.....                                               | S4     |
| 5. <sup>1</sup> H, <sup>13</sup> C spectrum and HRMS of all compounds..... | S5-S83 |
| 6. HRMS of intermediate <b>A1</b> .....                                    | S84    |

### 1. General information and methods

Starting material 4-Hydroxydithiocoumarin and 4-hydroxythiocoumarin was synthesized in our laboratory via previously reported methods. While cinnamaldehyde derivatives were all Sigma Aldrich. Melting points were recorded using the melting point apparatus (Stuart company). <sup>1</sup>H and <sup>13</sup>C NMR spectra were recorded on 400 and 500 MHz and 100, 125 MHz (Bruker) NMR spectrometers, respectively. TMS is used as an internal reference; chemical shifts ( $\delta$  scale) are reported in parts per million (ppm). <sup>1</sup>H NMR spectra are reported in the order of multiplicity, coupling constant (J value) in Hertz (Hz), and the number of protons; signals were characterized as s (singlet), d (doublet), t (triplet), m (multiplet) and bs (broad). IR spectra were recorded on an IR spectrophotometer. HRMS spectra were recorded on a TOF mass analyser. The structure was also determined using a single XRD diffractometer.

## 2. X-ray crystallographic data of compound 3e

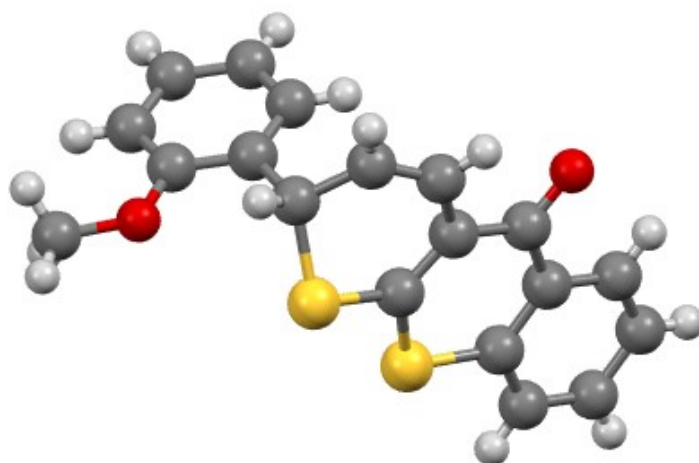

**Figure.** ORTEP Diagram of compound **3e**

**Table S1.** Crystal data and structure refinement for compound (**3e**)

| Entry | Identification Code           | Compound 3e                                                                            |
|-------|-------------------------------|----------------------------------------------------------------------------------------|
| 01    | Empirical formula             | <u>C<sub>19</sub>H<sub>14</sub>O<sub>2</sub>S<sub>2</sub></u>                          |
| 02    | Formula weight                | 338.42                                                                                 |
| 03    | Temperature                   | <u>297</u> K                                                                           |
| 04    | Wavelength                    | 0.71073                                                                                |
| 05    | Radiation type                | Mo K $\alpha$                                                                          |
| 06    | Radiation system              | Fine-focus sealed tube                                                                 |
| 07    | Crystal system                | <u>Triclinic</u>                                                                       |
| 08    | Space group                   | P-1                                                                                    |
| 09    | Cell length(Å)                | (a) <u>7.6579 (10)</u> , (b) <u>13.8840(19)</u><br>(c) <u>14.998 (2)</u>               |
| 10    | Cell angle (°)                | $\alpha$ <u>87.216 (3)</u> , $\beta$ <u>89.610 (4)</u> , $\gamma$<br><u>83.982 (3)</u> |
| 11    | Cell volume (Å <sup>3</sup> ) | 1584.0 (4)                                                                             |

|    |                       |            |
|----|-----------------------|------------|
| 12 | Density               | 1.419      |
| 13 | Absorption correction | multi-scan |
| 14 | Reflection number     | 6867       |
| 15 | Cell formula units Z  | 2          |
| 16 | CCDC no               | 2311036    |

### 3. Substrate scope<sup>a,b</sup>

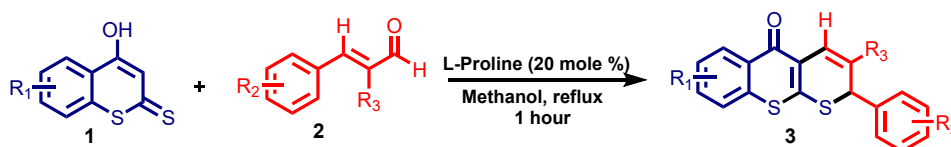

$R_1 = 5\text{Cl}, 6\text{Cl}, 7\text{Cl}, 7\text{F}, 6\text{CF}_3$

$R_2 = \text{Br}, -\text{CH}_3, -\text{OMe}, \text{NO}_2, -\text{NMe}_2$

$R_3 = -\text{CH}_3$

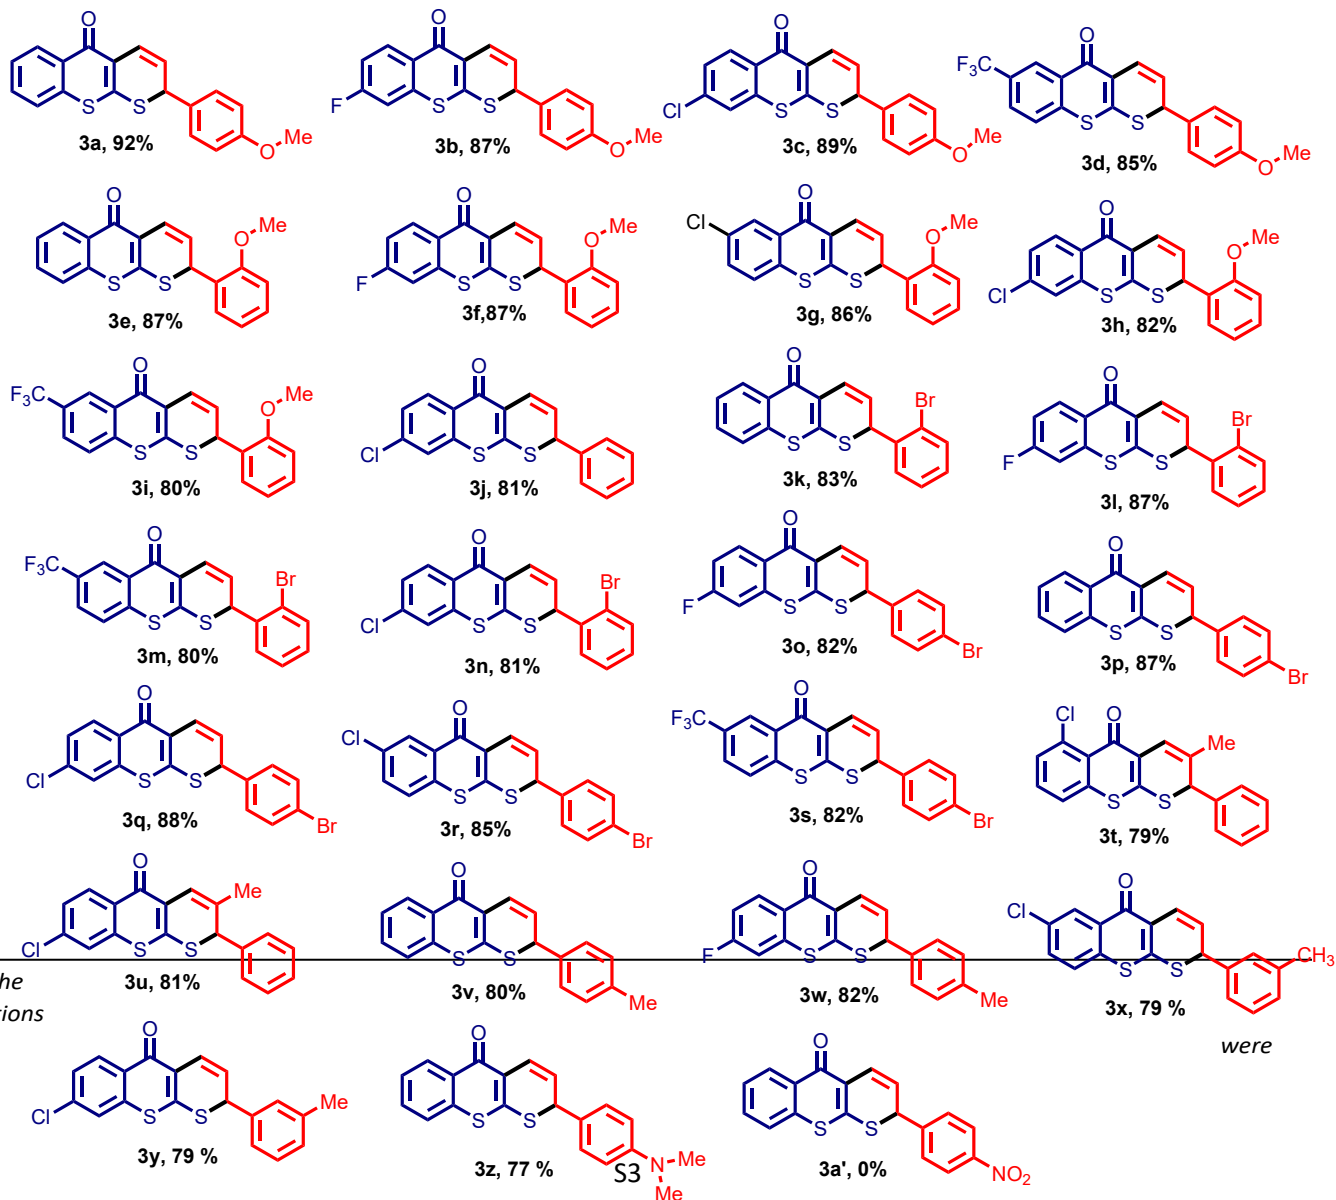

carried out using 4-hydroxydithiocoumarin (**1**, 0.2 mmol), cinnamaldehyde (**2**, 0.2 mmol) in the presence of 20 mol% catalyst, 1 mL of methanol Solvent at reflux temperature. <sup>b</sup>Isolated yield.

#### 4. Unsuccessful results<sup>a</sup>

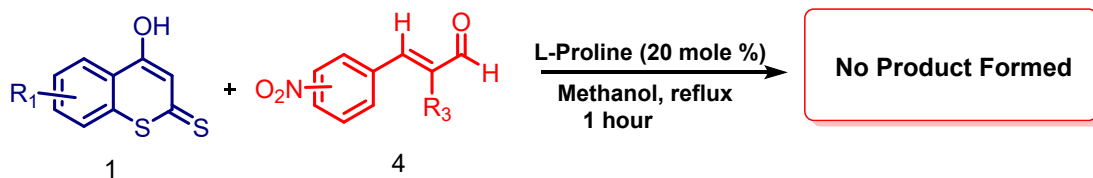

The reactions were carried out using 4-hydroxydithiocoumarin (**1**, 0.2 mmol), Nitrocinnamaldehyde (**4**, 0.2 mmol) in the presence of 20 mol% catalyst, 1 mL of methanol Solvent at reflux temperature.

**5.  $^1\text{H}$ ,  $^{13}\text{C}$  spectrum and HRMS of all compounds**

**$^1\text{H}$  NMR Compound (3a)**

ATK-AA-1-1H.24.fid  
ATK-AA-1-1H

8.52 8.52 8.51 8.51 7.55 7.55 7.54 7.53 7.52 7.52 7.50 7.50 7.49 7.48 7.47 7.47 7.43 7.43 7.41 7.41 7.31 7.31 7.29 7.29 7.29 7.28 7.28 7.26 7.26 6.86 6.86 6.85 6.84 6.84 6.83 5.98 5.97 5.96 5.95 4.92 4.92 4.91 4.91 3.78

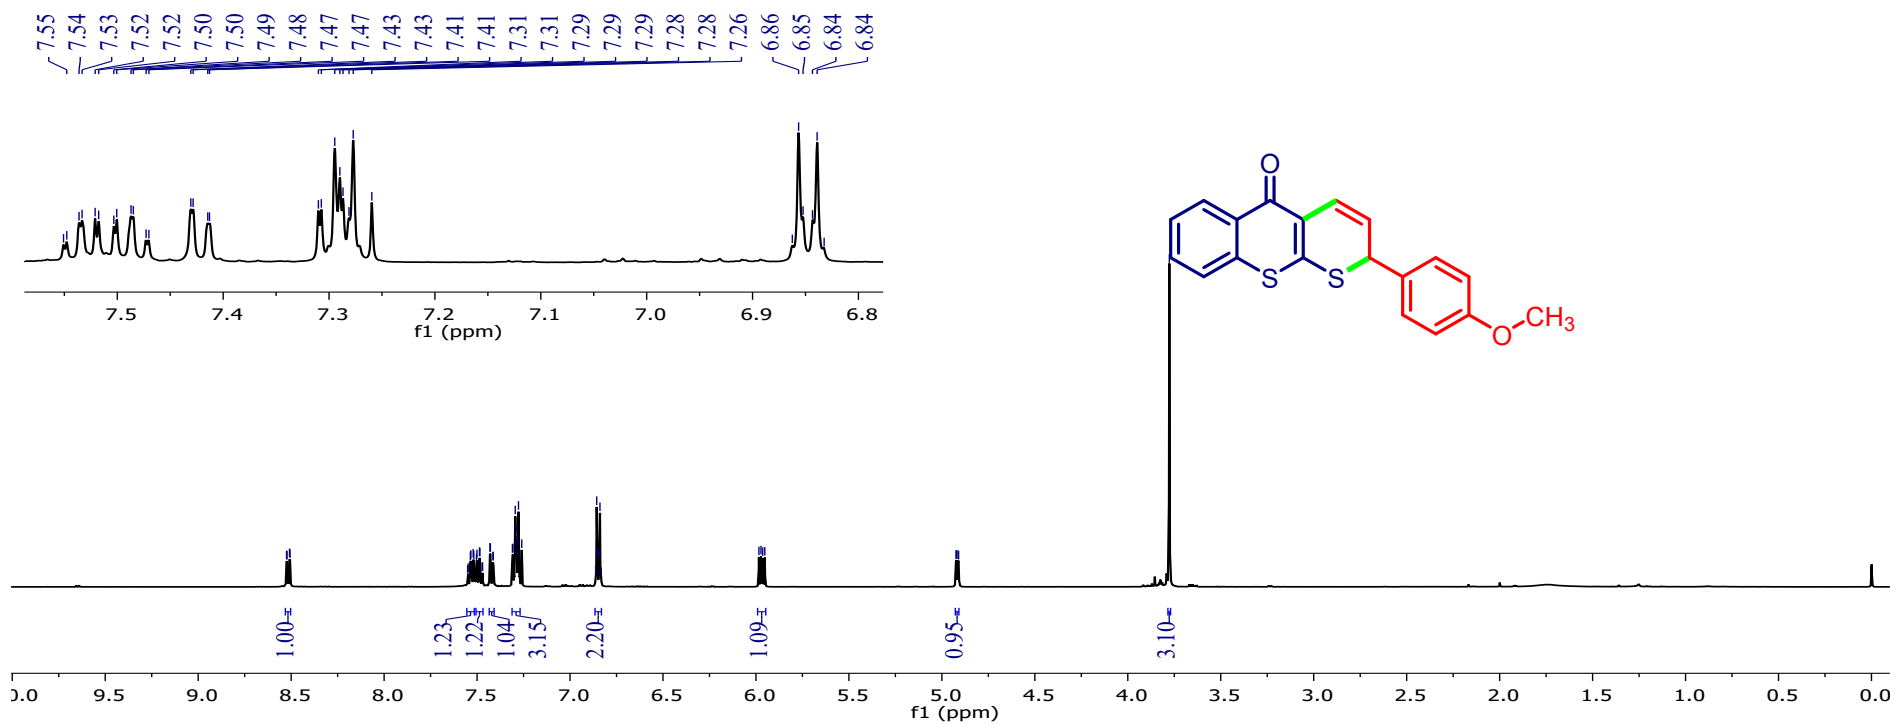

<sup>13</sup>C NMR Compound (3a)

ATK-AA-1-13C.26.fid  
ATK-AA-1-13C

175.23  
159.81  
145.95  
136.34  
131.65  
131.40  
129.61  
129.28  
127.74  
125.84  
125.43  
124.01  
121.81  
114.44

77.41  
77.16  
76.91  
55.43  
43.88

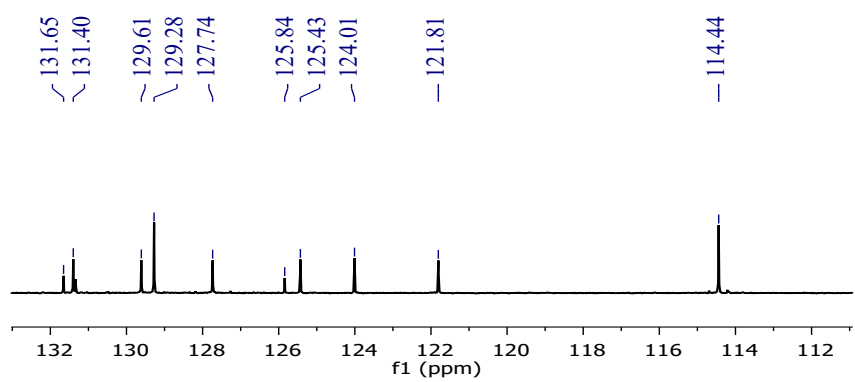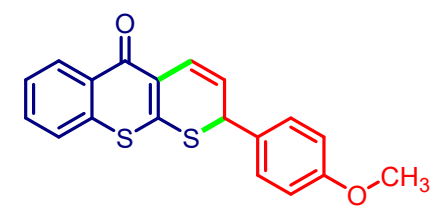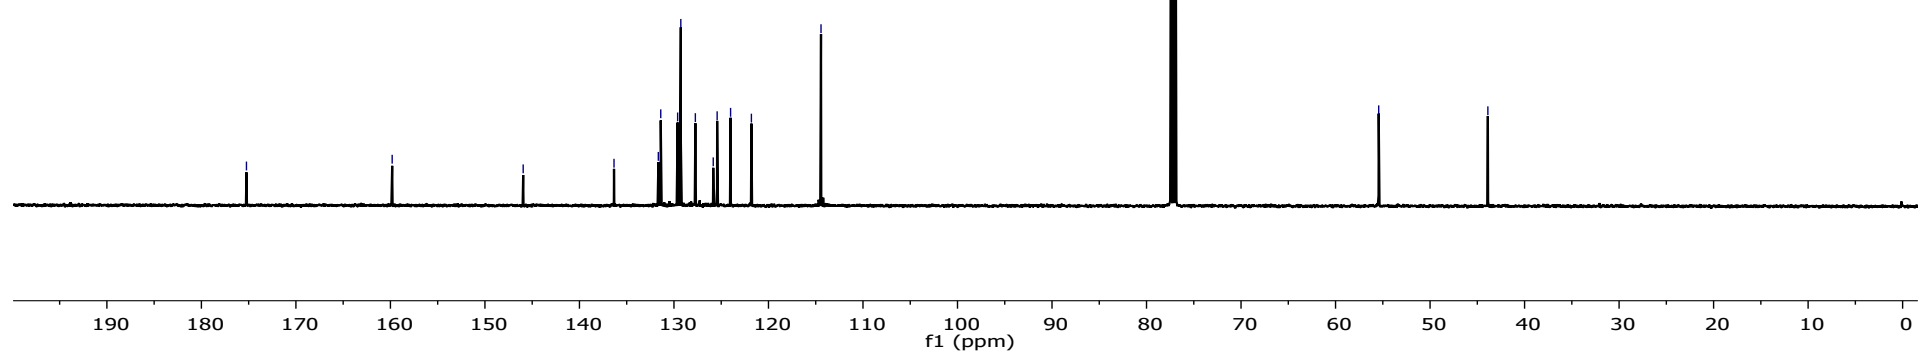

HRMS 3a

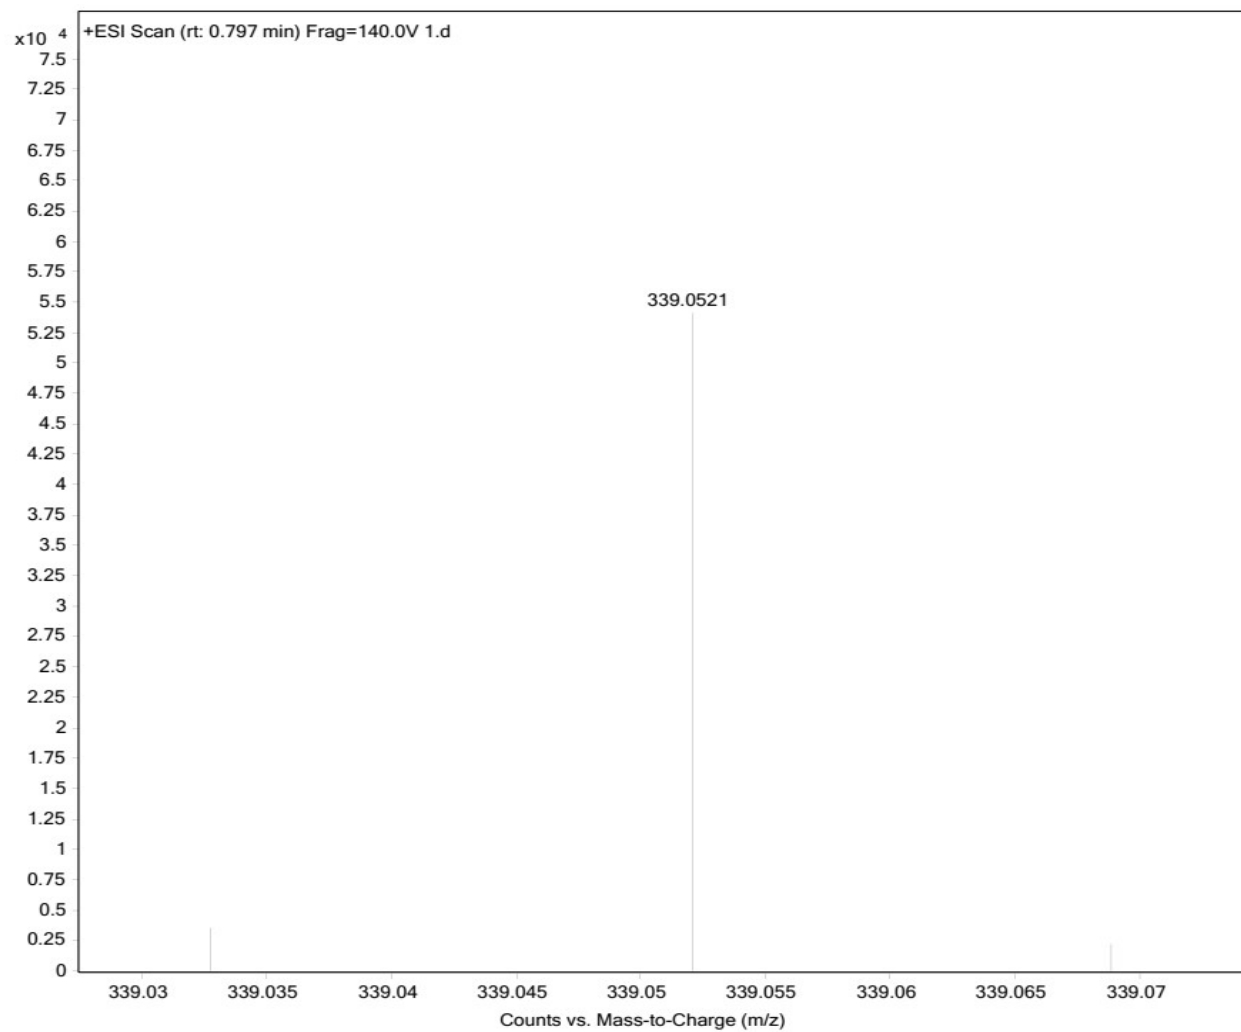

**$^1\text{H}$  NMR Compound (3b)**



ATK-AA-72-FH-3-01  
 ATK-AA-72-FH-3-01

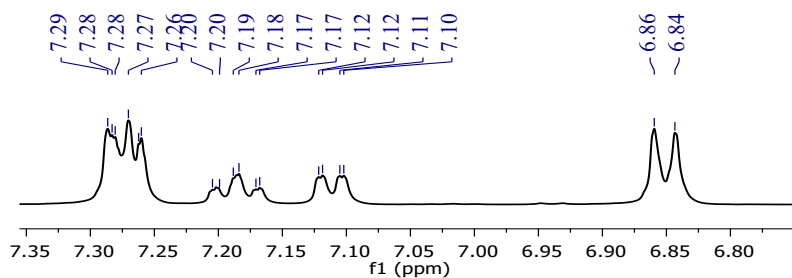

— 3.78

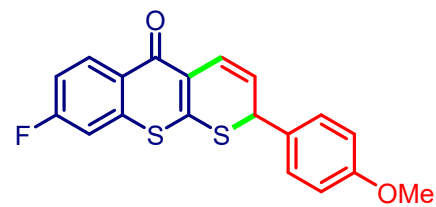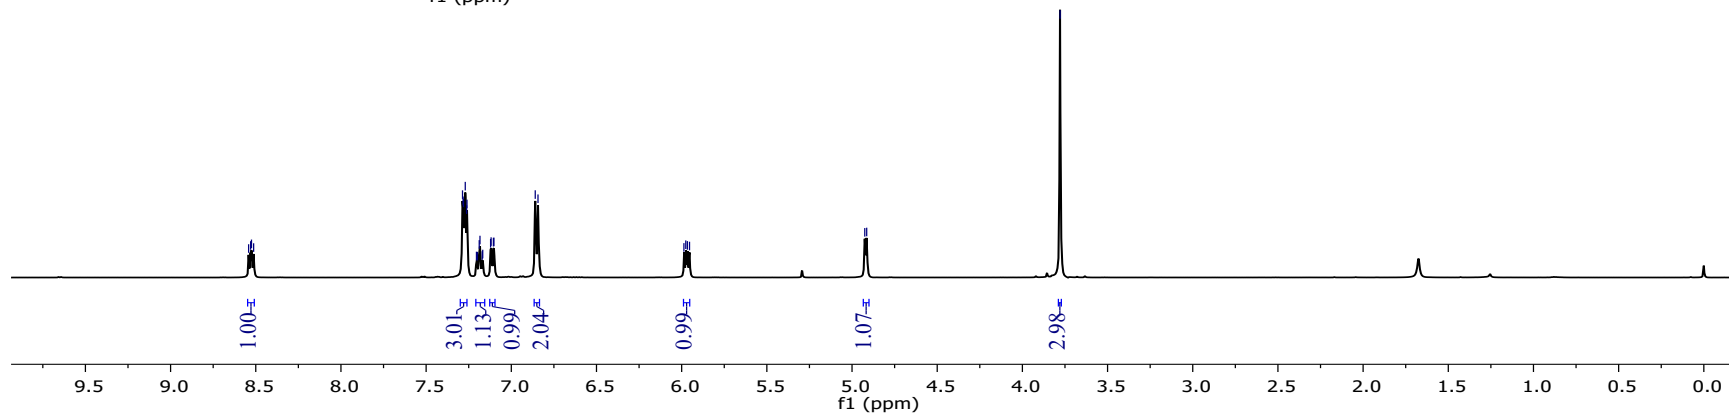

**<sup>13</sup>C NMR Compound (3b)**

ATK-AA-22-13C.1.fid  
ATK-AA-22-13C

174.36  
164.99  
162.96  
159.87  
145.40  
138.39  
138.31  
132.71  
132.64  
131.46  
129.28  
127.97  
127.96  
125.83  
123.85  
121.99  
116.30  
116.12  
114.47  
111.54  
111.35  
77.41  
77.16  
76.91  
55.43  
43.91

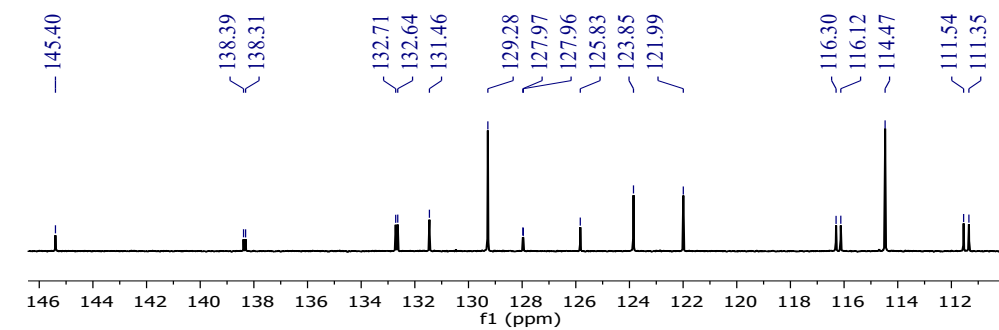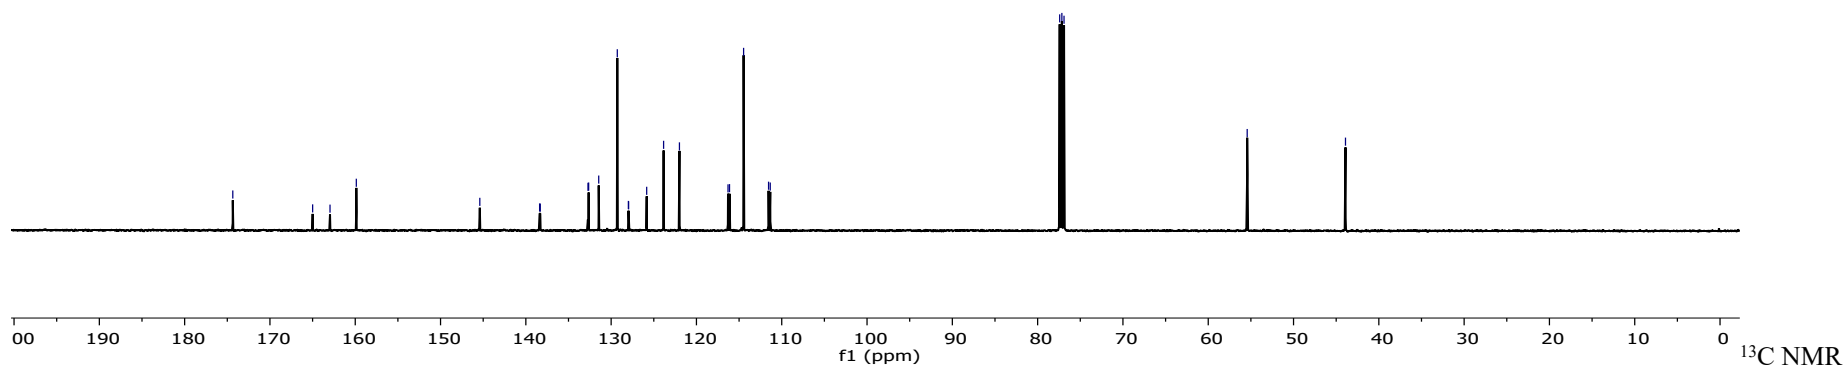

HRMS of compound 3b

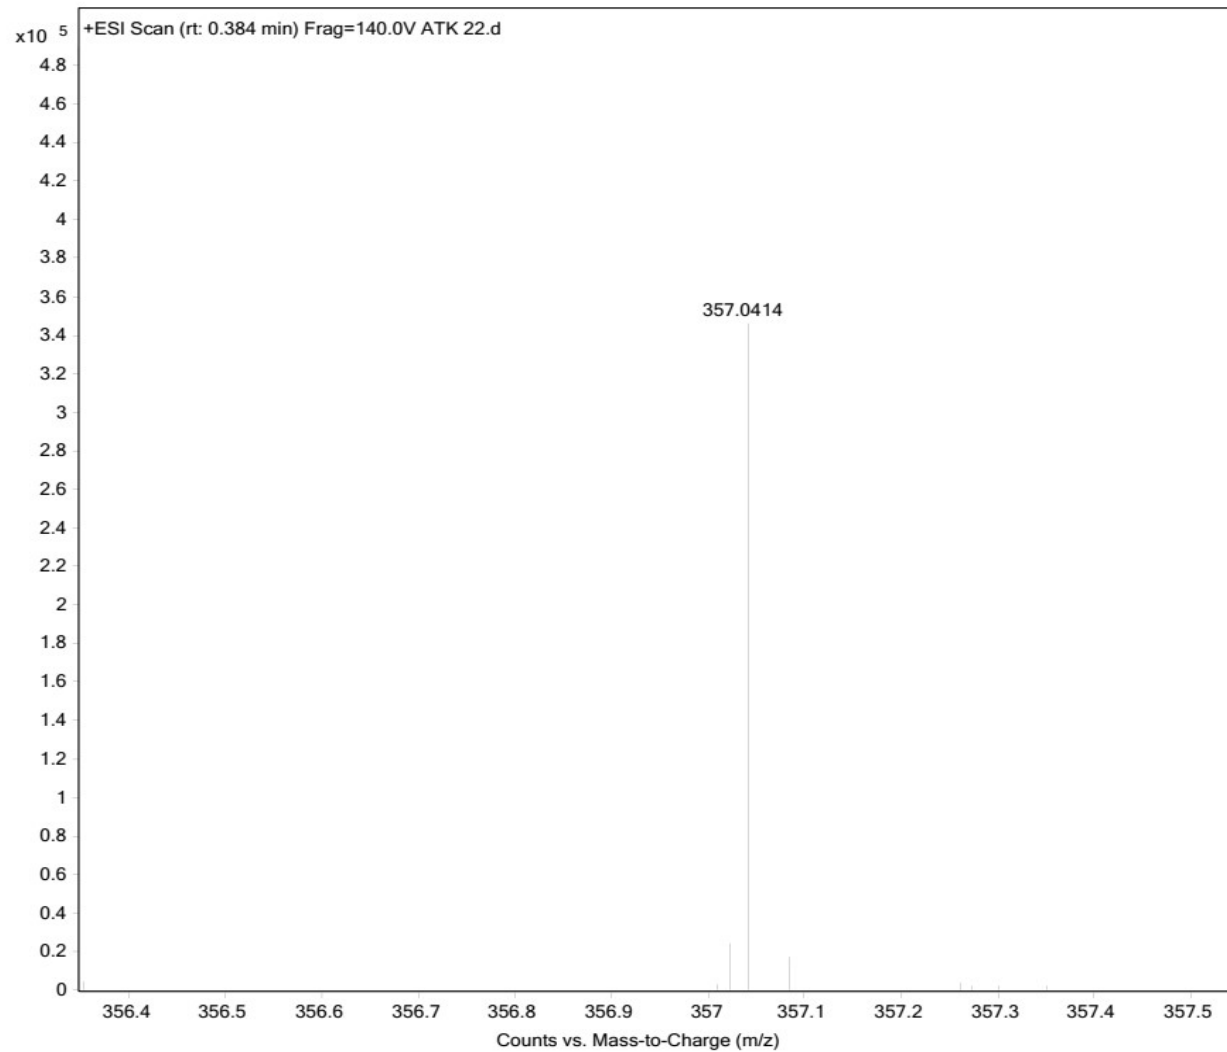

# <sup>1</sup>H NMR Compound (3c)

ATK-AA-12-P2A12-1H.1.fid — ATK-AA-12-P2A12-1H

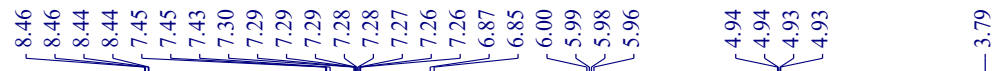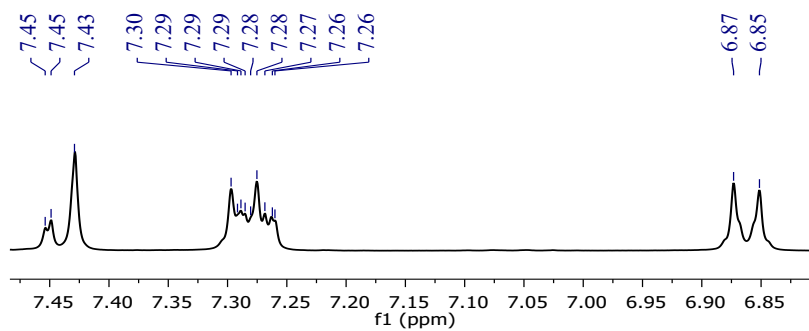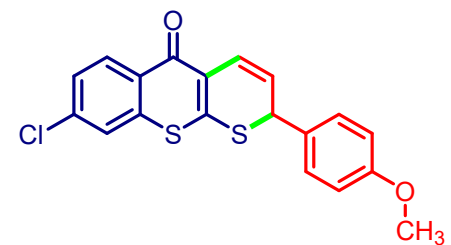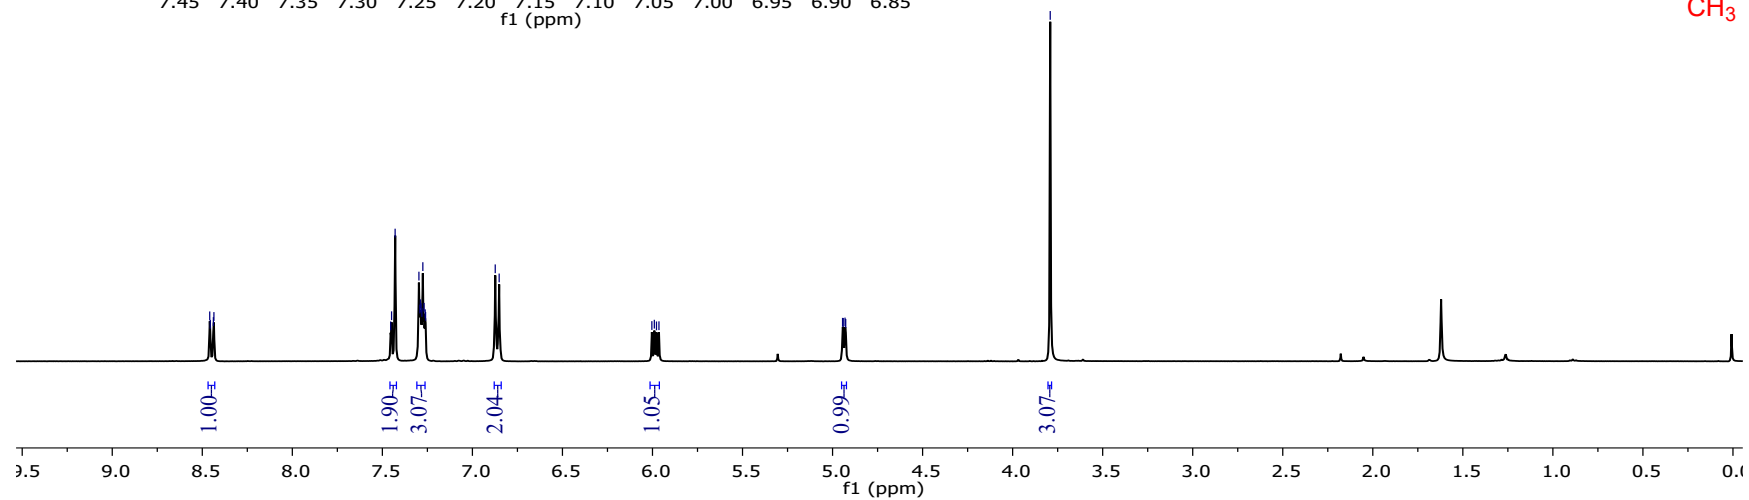

# <sup>13</sup>C NMR Compound (3c)

ATK-AA-I2-P2A12-13C.1.fid  
ATK-AA-I2-P2A12-13C

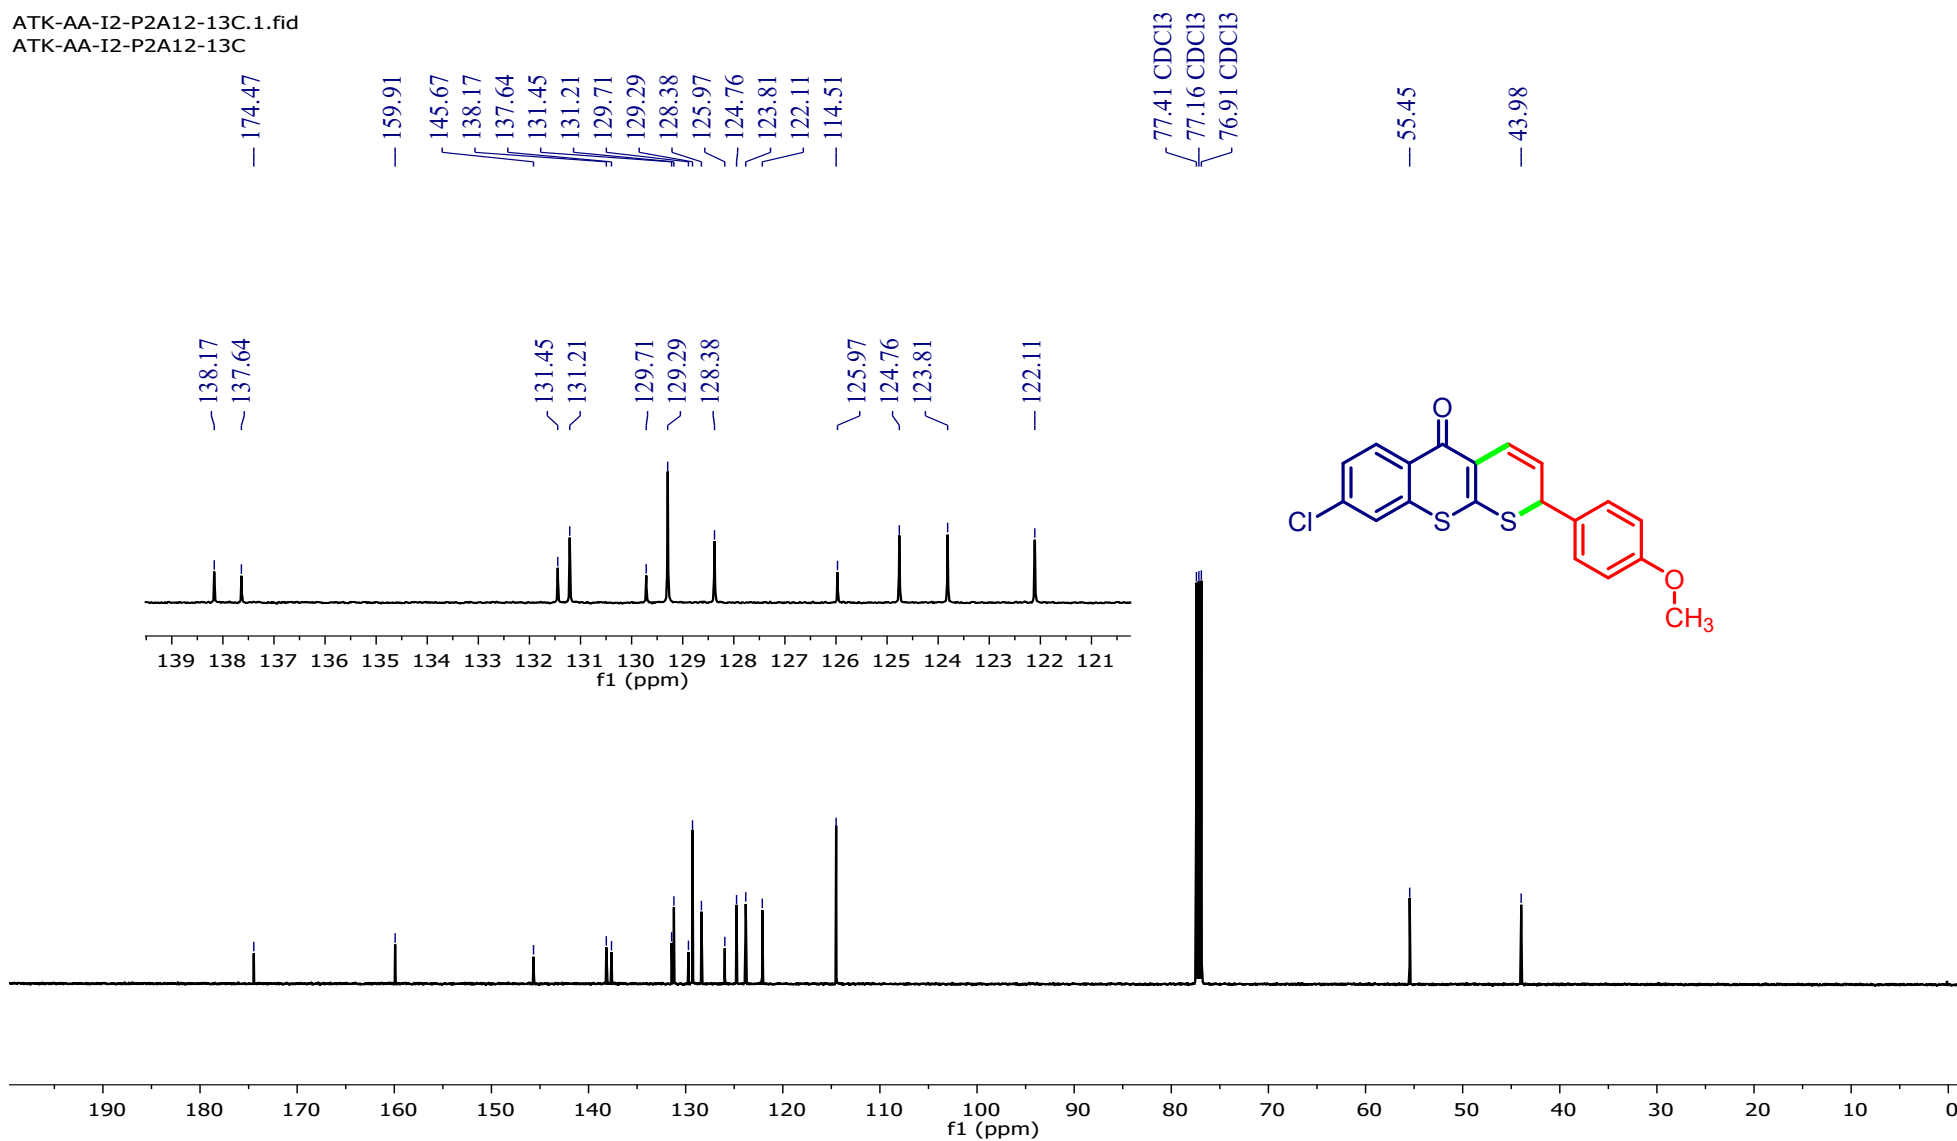

HRMS compound (3c)

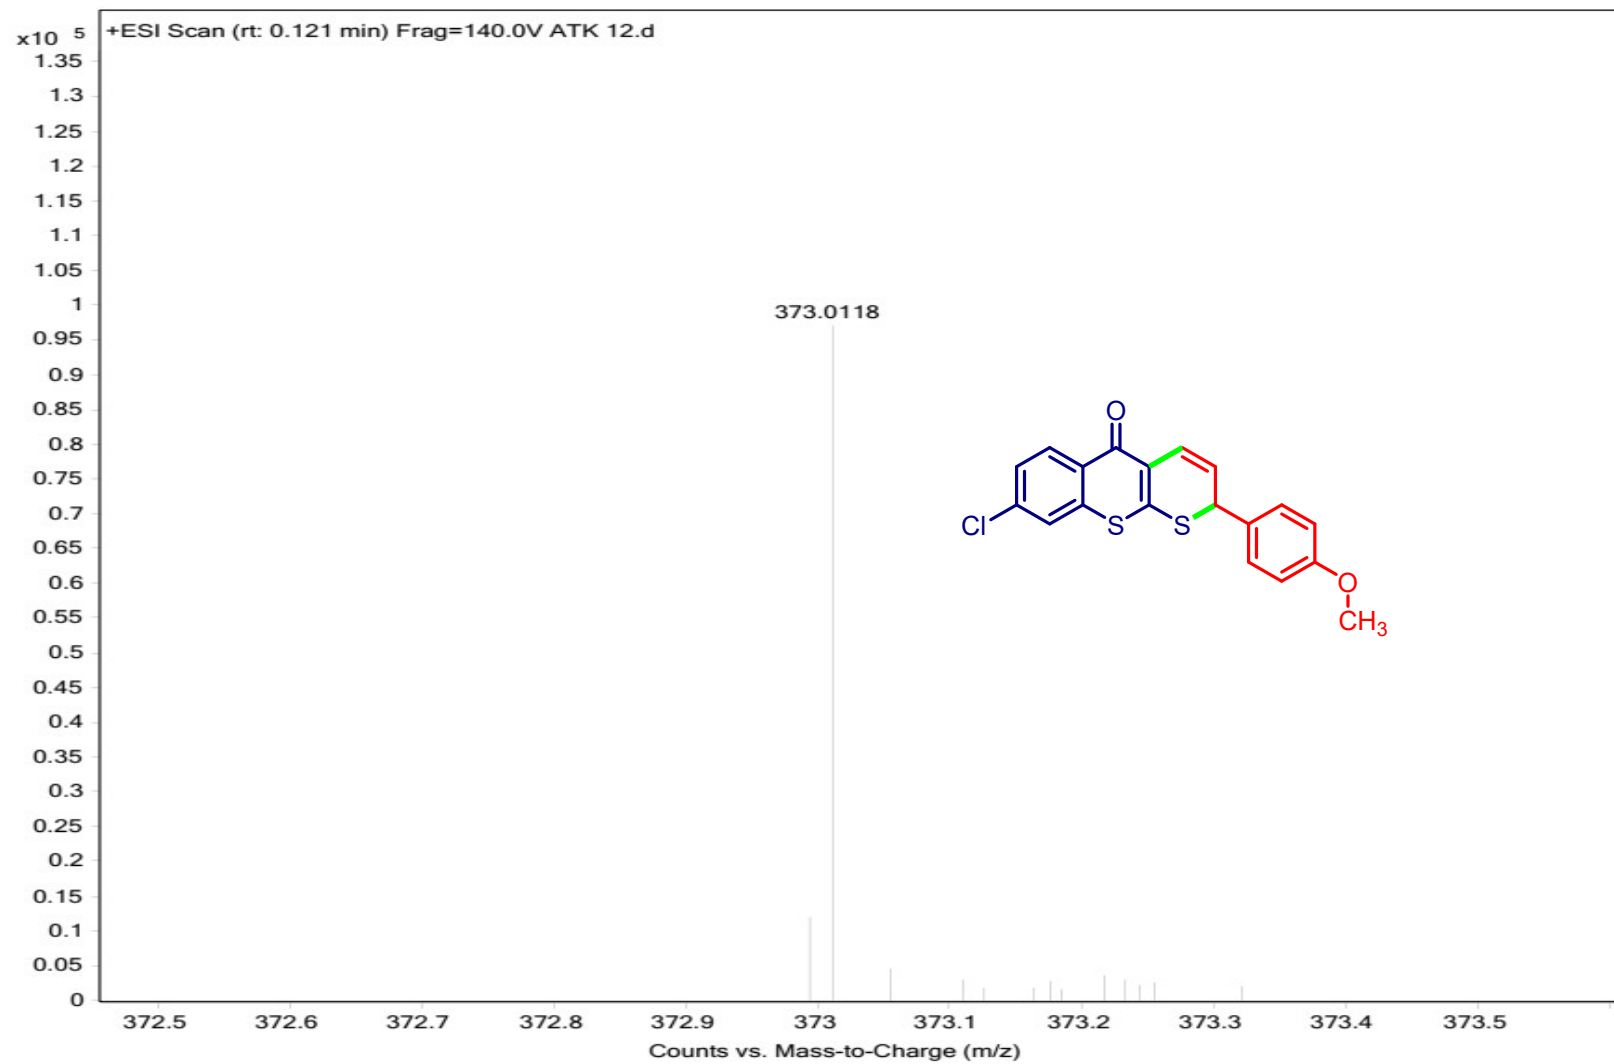

### <sup>1</sup>H NMR of compound (3d)

MPO-AA-31-1H.5.fid  
MPO-AA-31-1H

8.78  
7.73  
7.71  
7.53  
7.52  
7.28  
7.28  
7.26  
6.85  
6.84  
6.00  
5.99  
5.98  
5.97  
4.95  
4.93  
3.77

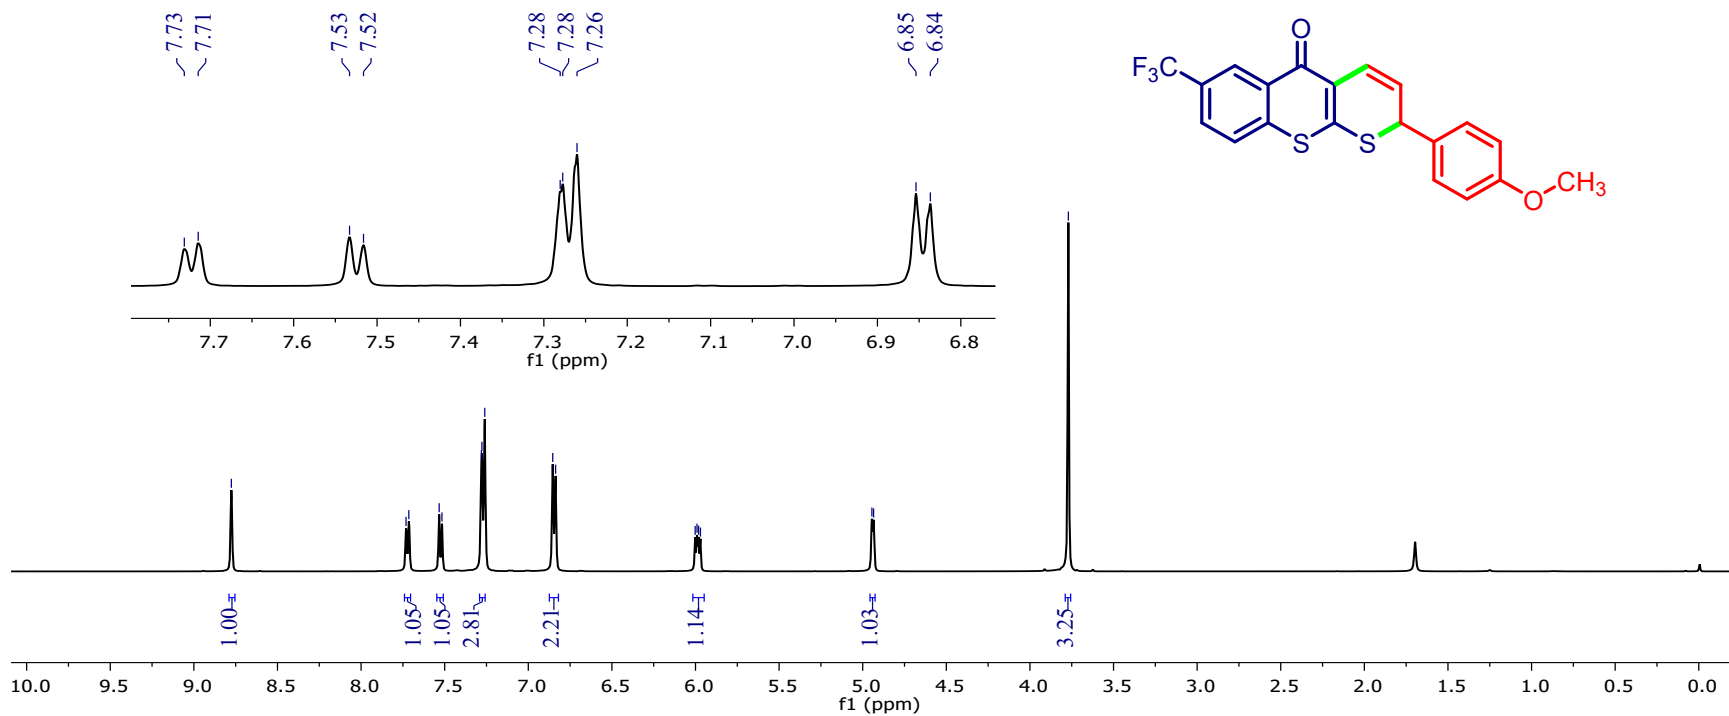

(500 MHz, DMSO-*d*<sub>6</sub>) δ 8.78 (s, 1H), 7.72 (d, *J* = 8.3 Hz, 1H), 7.52 (d, *J* = 8.4 Hz, 1H), 7.29 – 7.26 (m, 3H), 6.85 (d, *J* = 8.6 Hz, 2H), 5.99 (dd, *J* = 10.2, 5.5 Hz, 1H), 4.94 (d, *J* = 5.1 Hz, 1H), 3.77 (s, 3H).

### <sup>13</sup>C NMR of compound (3d)

MPO-AA-31-13C.1.fid  
MPO-AA-31-13C

174.13  
159.92  
146.19  
139.88  
131.35  
131.28  
130.39  
130.12  
129.86  
129.59  
129.27  
129.27  
127.38  
127.35  
127.32  
127.30  
127.04  
127.00  
126.97  
126.94  
126.87  
126.30  
126.01  
124.70  
123.67  
122.53  
122.35  
120.37  
114.50  
77.41  
77.16  
76.91  
55.42  
43.99

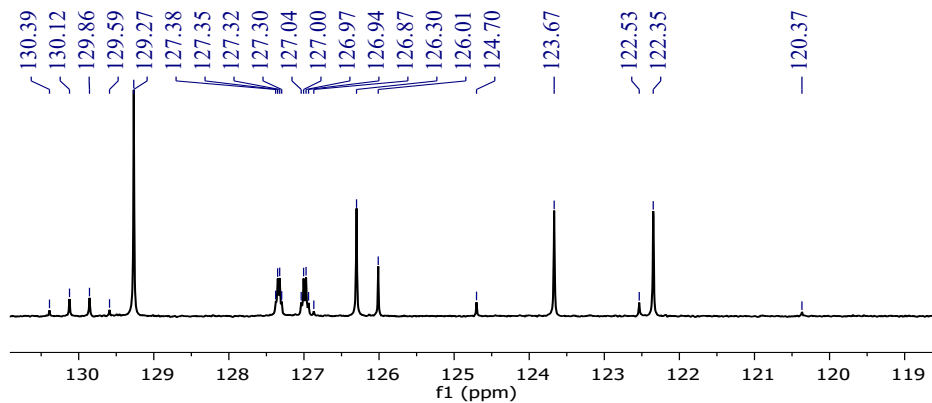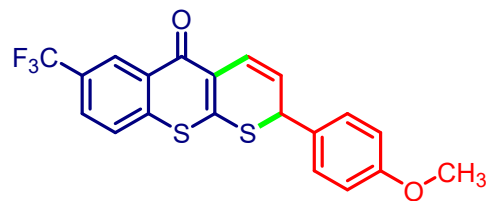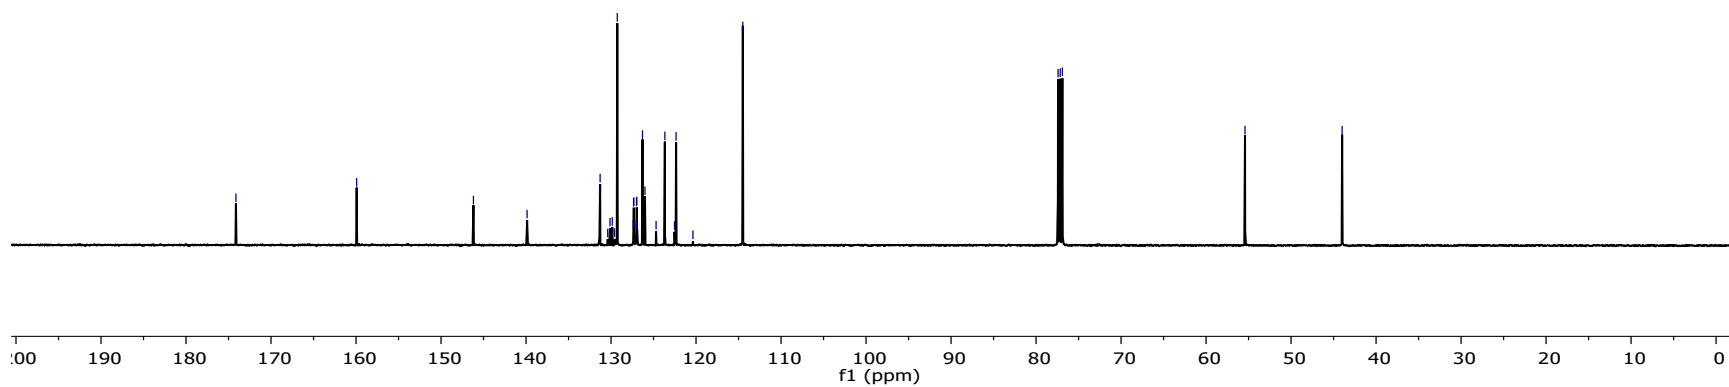



# Hrms 3d

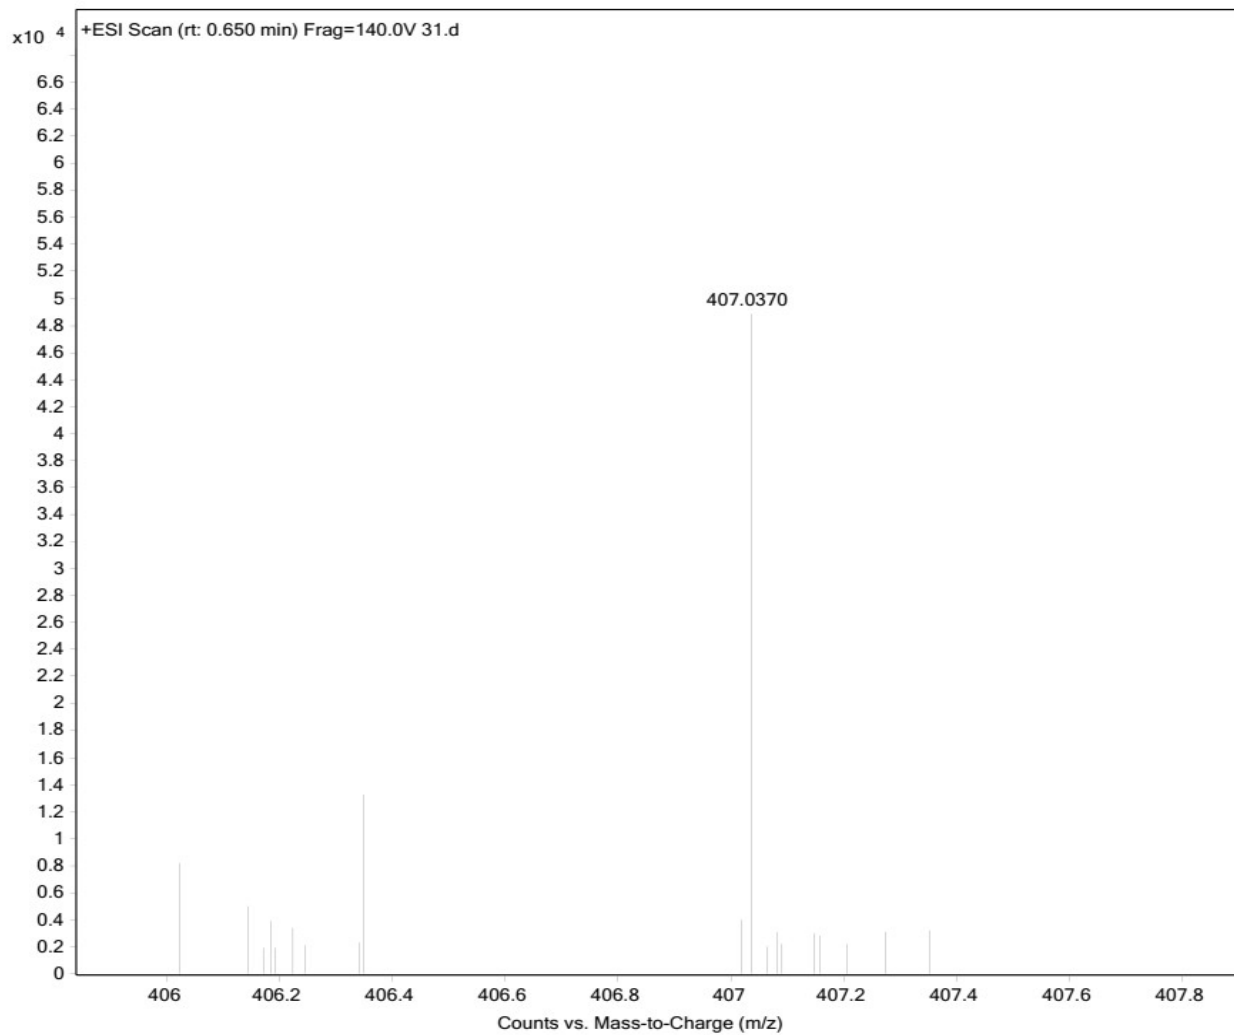

**<sup>1</sup>H NMR Compound (3e)**

ATK-AA-3-P2-A3-1H-101d  
 ATK-AA-3-P2-A3-1H

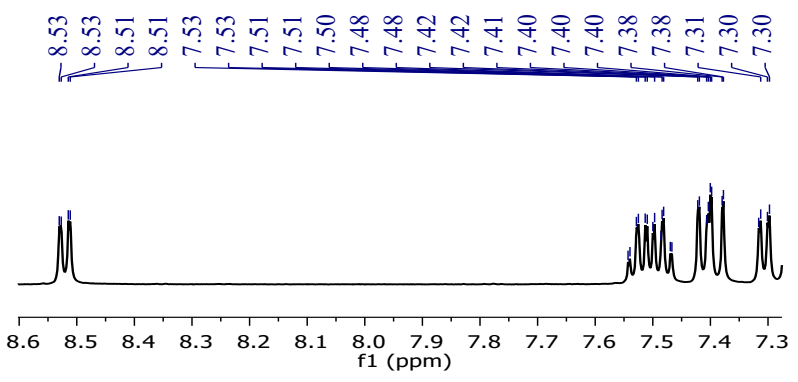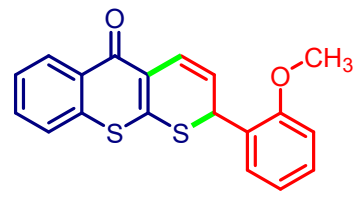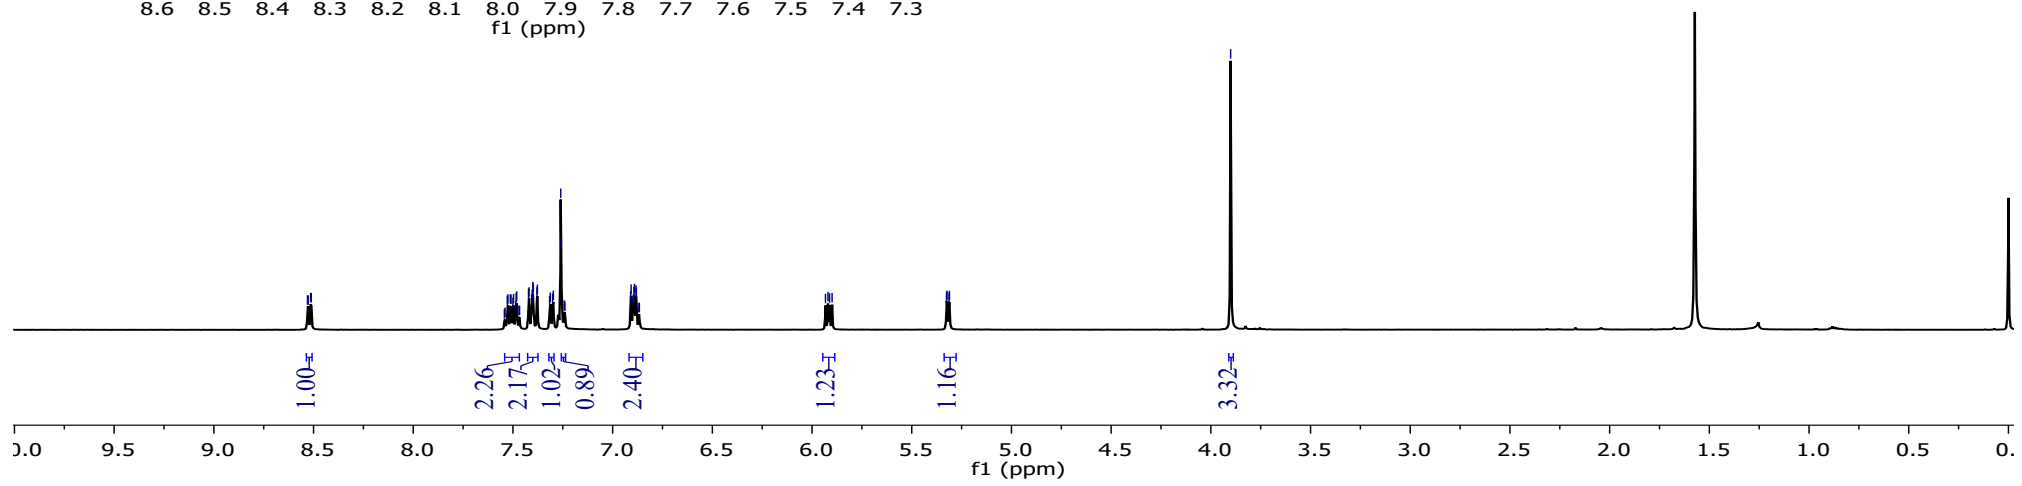

# <sup>13</sup>C NMR Compound (3e)

ATK-AA-3-P2-A3-13C.3.fid  
ATK-AA-3-P2-A3-13C

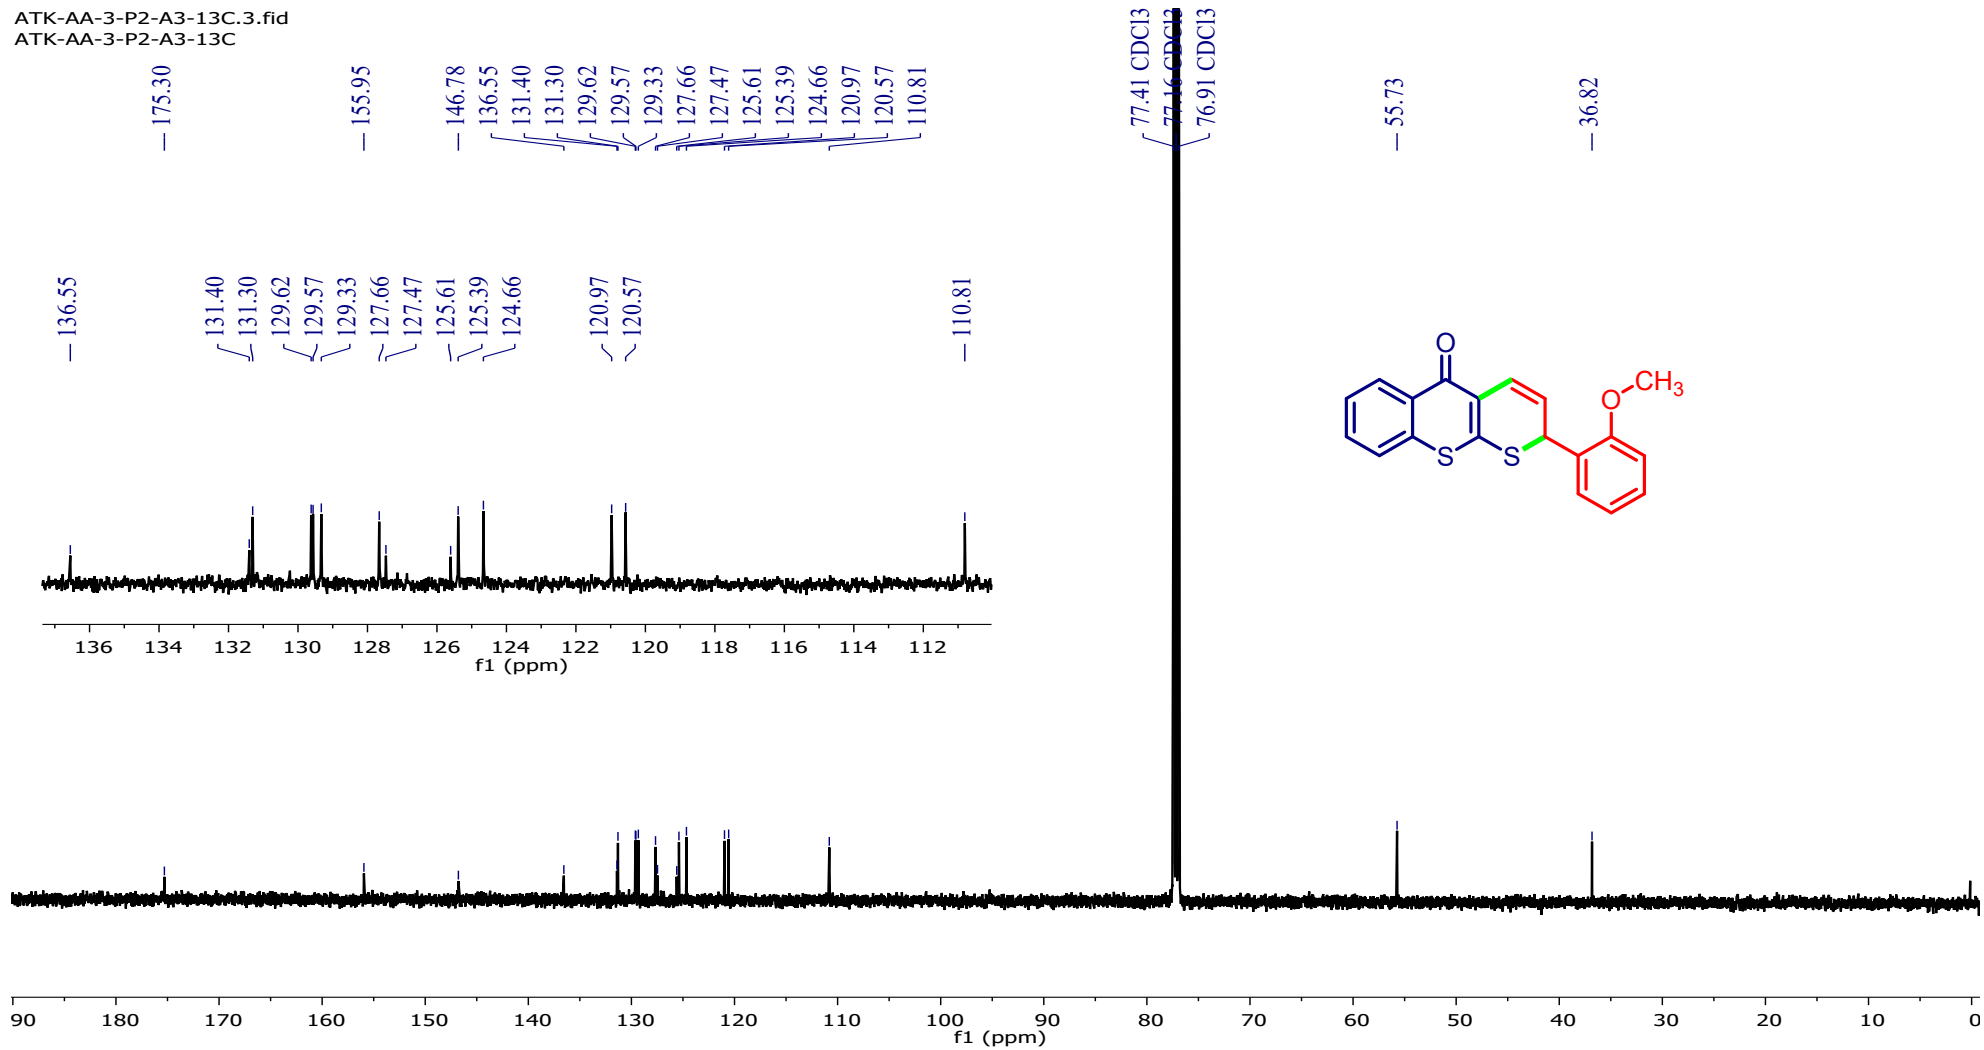

### HRMS (3e)

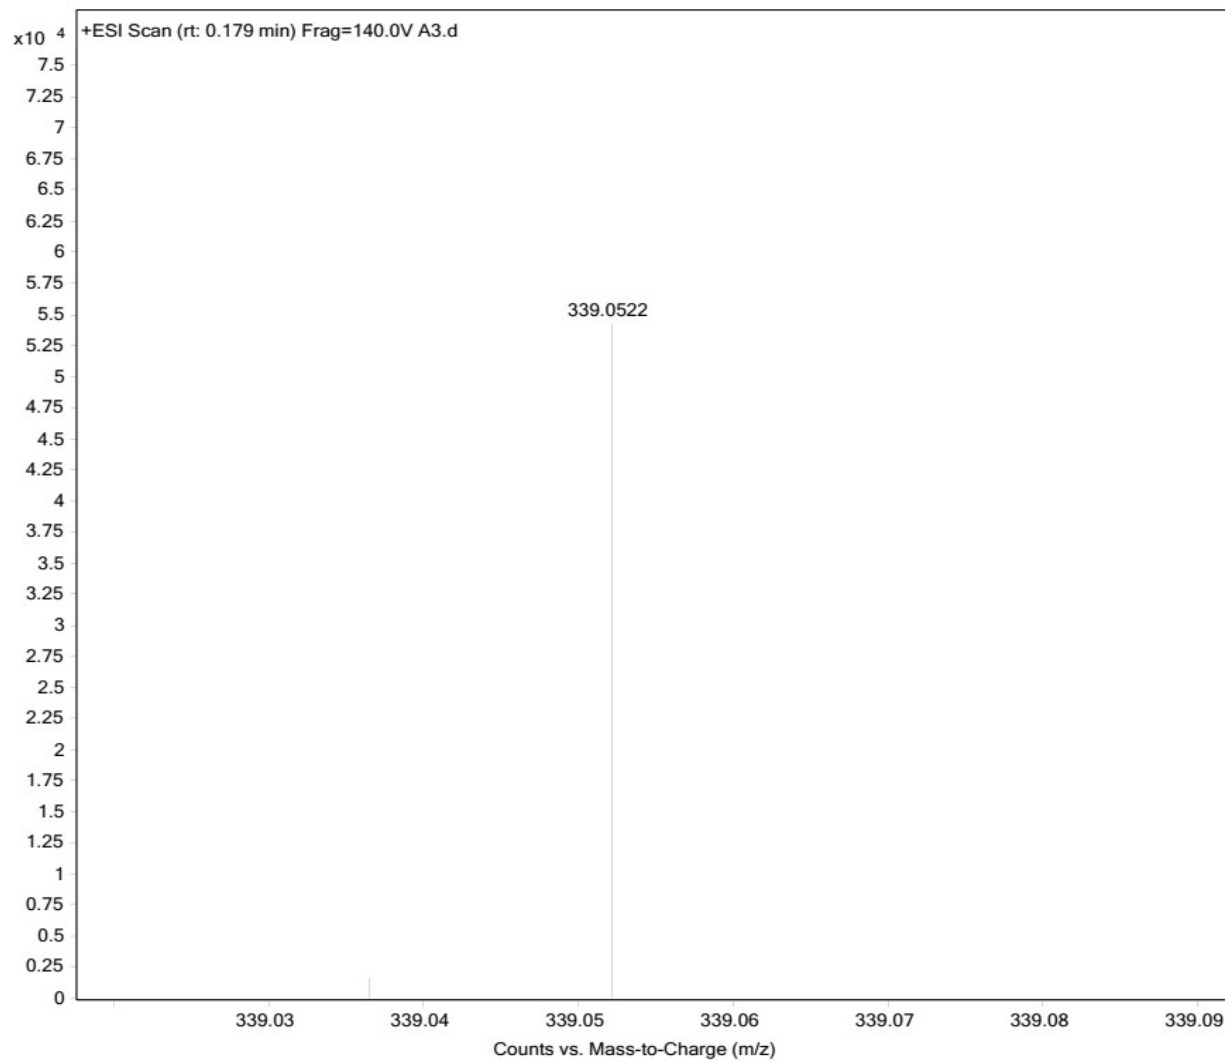

# <sup>1</sup>H NMR Compound (3f)

ATK-AA-23-1H.5.fid  
ATK-AA-23-1H

8.56  
8.55  
8.54  
8.53  
7.39  
7.37  
7.31  
7.30  
7.28  
7.26  
7.21  
7.21  
7.21  
7.19  
7.19  
7.18  
7.17  
7.12  
7.11  
7.10  
7.10  
6.92  
6.92  
6.91  
6.90  
6.88  
3.91

7.39  
7.37  
7.31  
7.30  
7.28  
7.26  
7.21  
7.21  
7.19  
7.19  
7.18  
7.17  
7.12  
7.11  
7.10  
7.10  
6.92  
6.92  
6.91  
6.90  
6.88

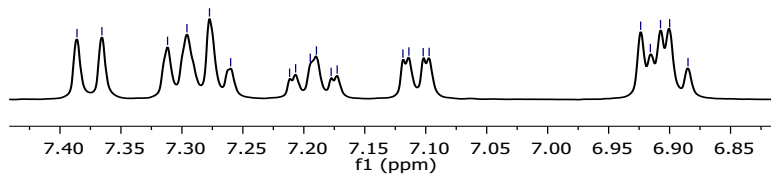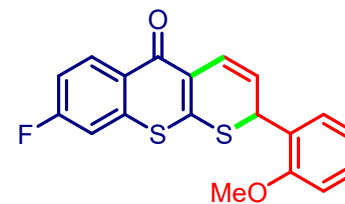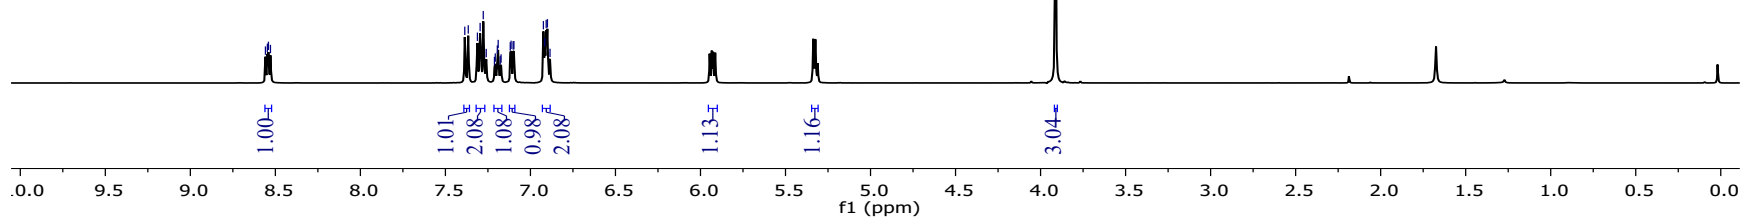

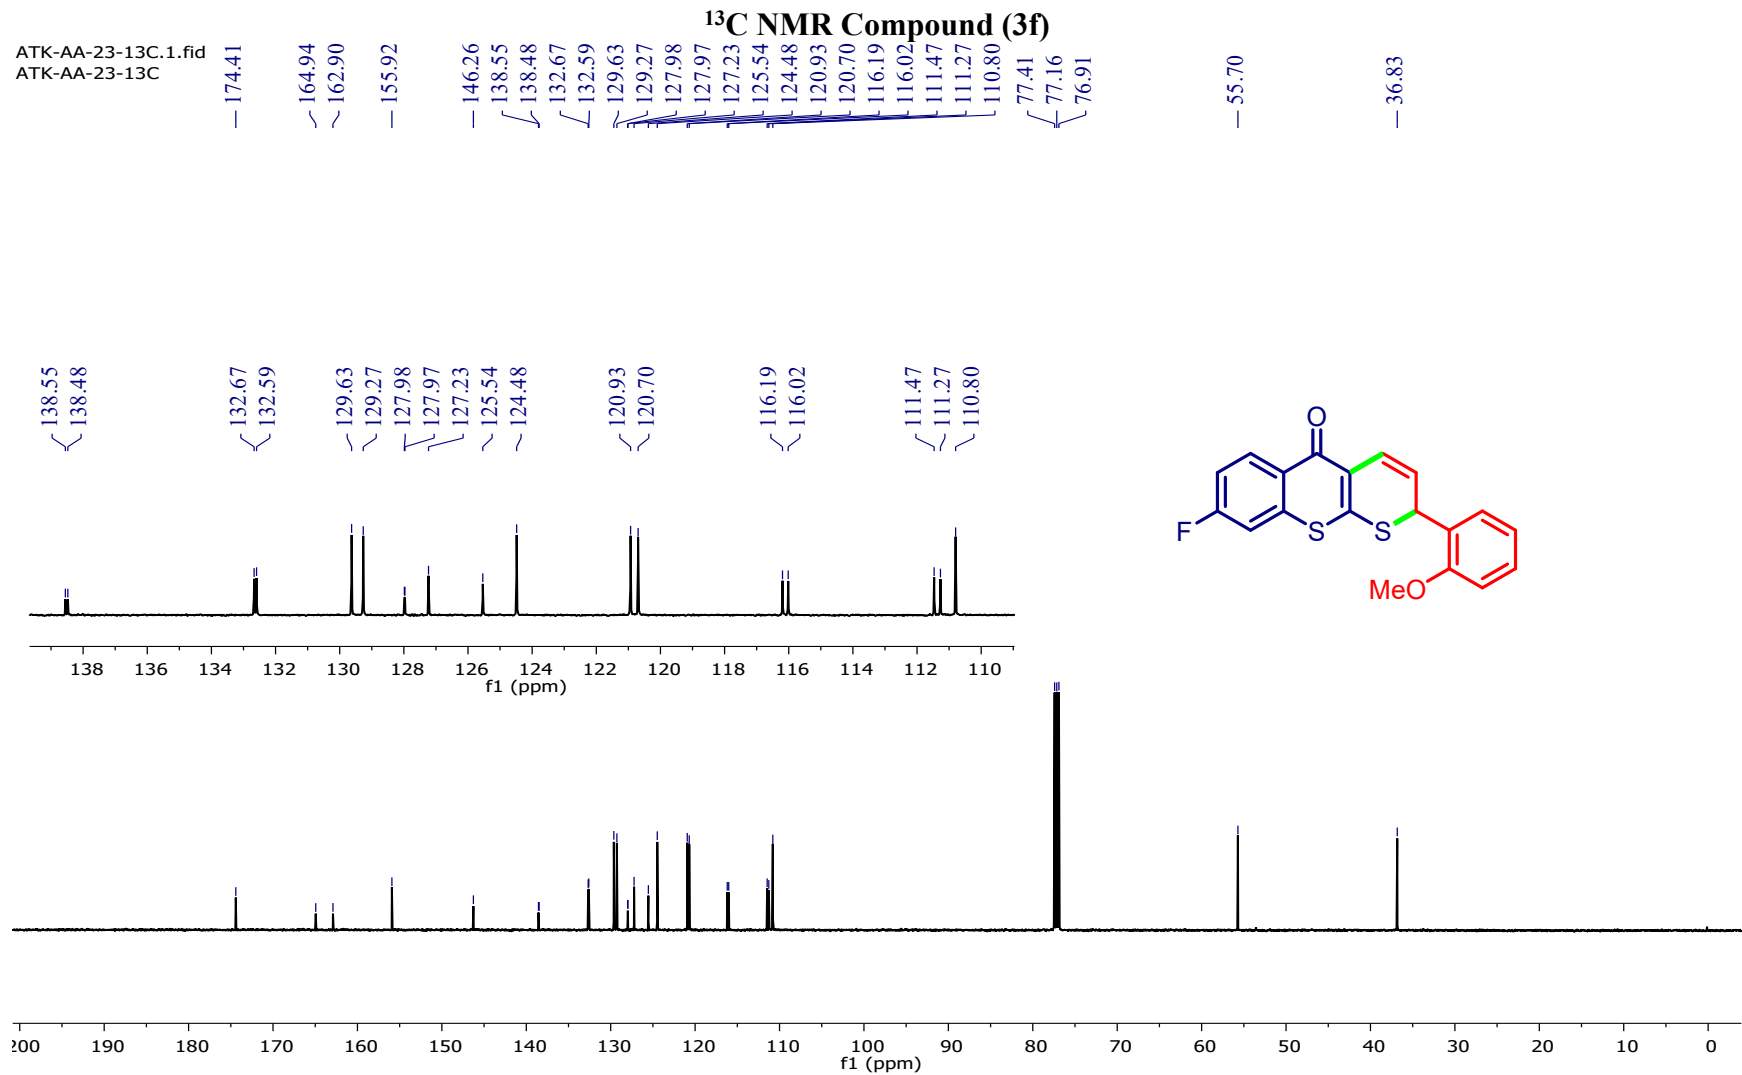

# HRMS 3f

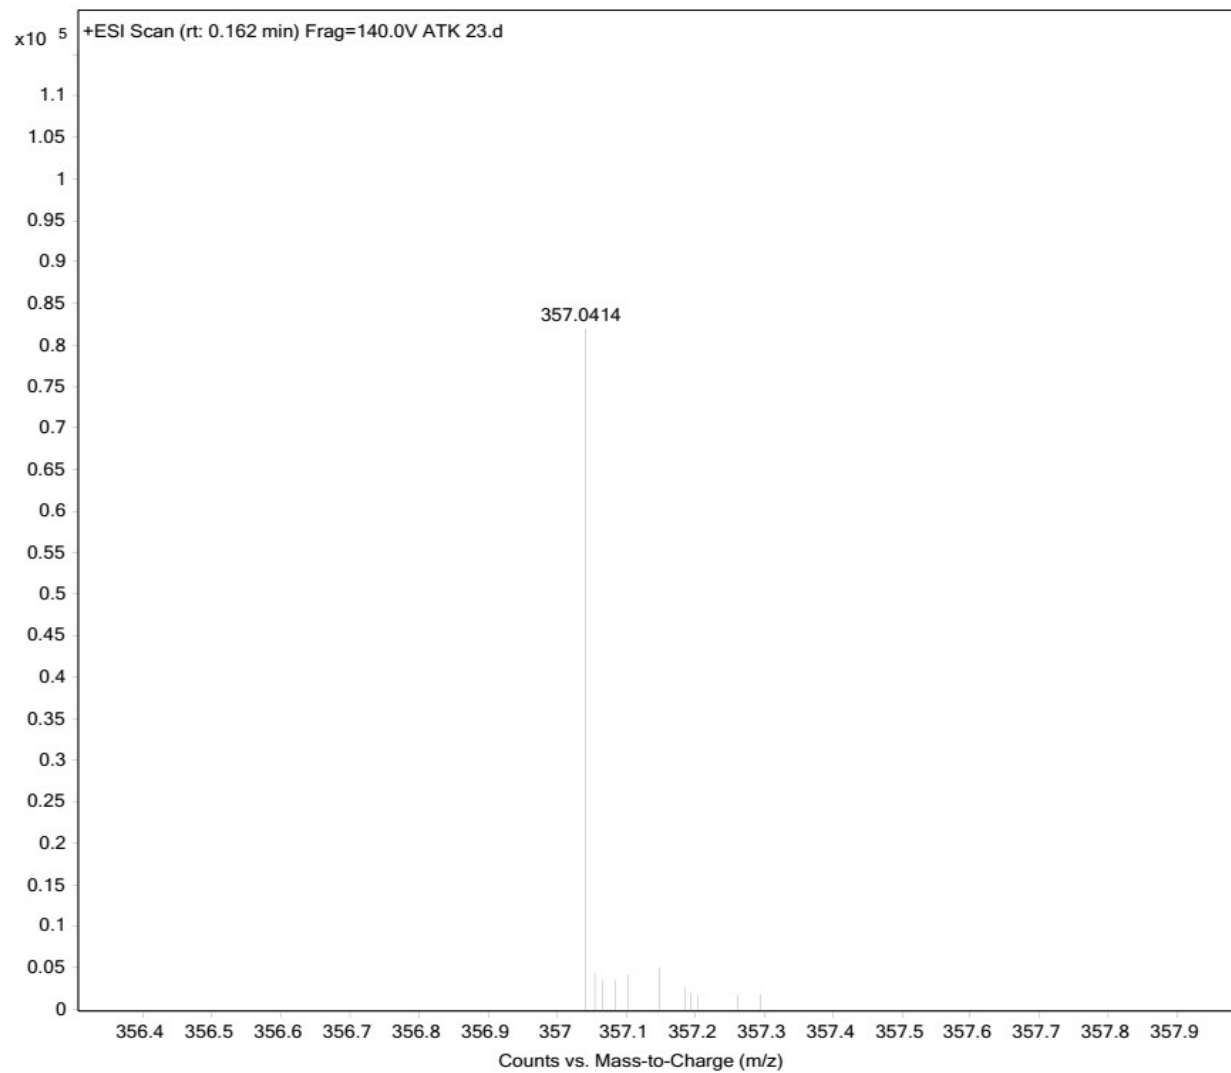



# <sup>1</sup>H NMR Compound (3g)

ATK-AA-11-P11-1H.1.fid — ATK-AA-11-P11-1H

8.45  
8.43  
7.44  
7.43  
7.41  
7.41  
7.41  
7.37  
7.36  
7.35  
7.34  
7.30  
7.29  
7.28  
7.28  
7.26  
7.26  
6.91  
6.90  
6.89  
6.89  
6.87  
5.94  
5.92  
5.92  
5.90  
5.33  
5.32  
— 3.90

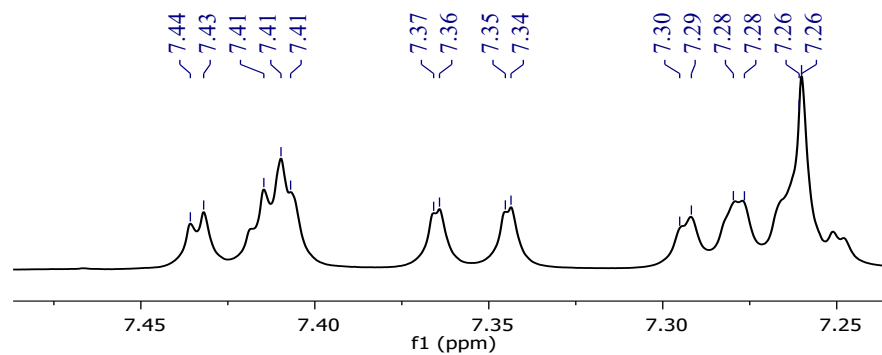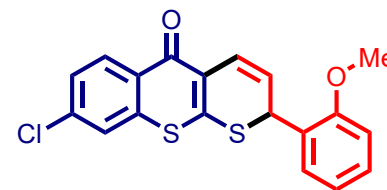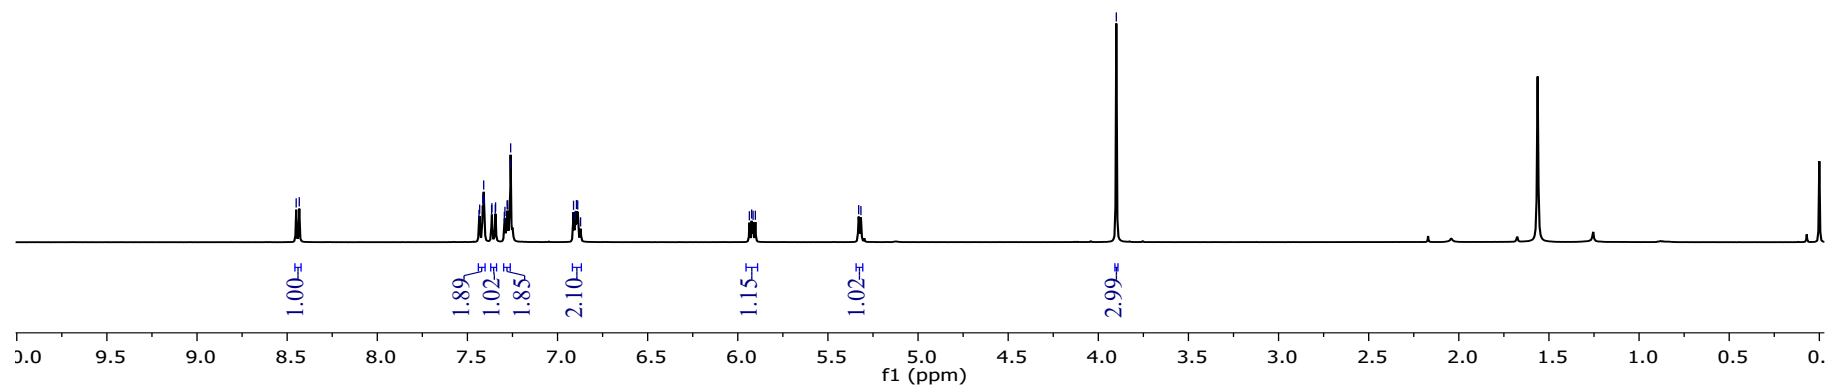

**$^{13}\text{C}$  NMR Compound (3g)**

ATK-AA-11-P11-13C.3.fid  
ATK-AA-11-P11-13C

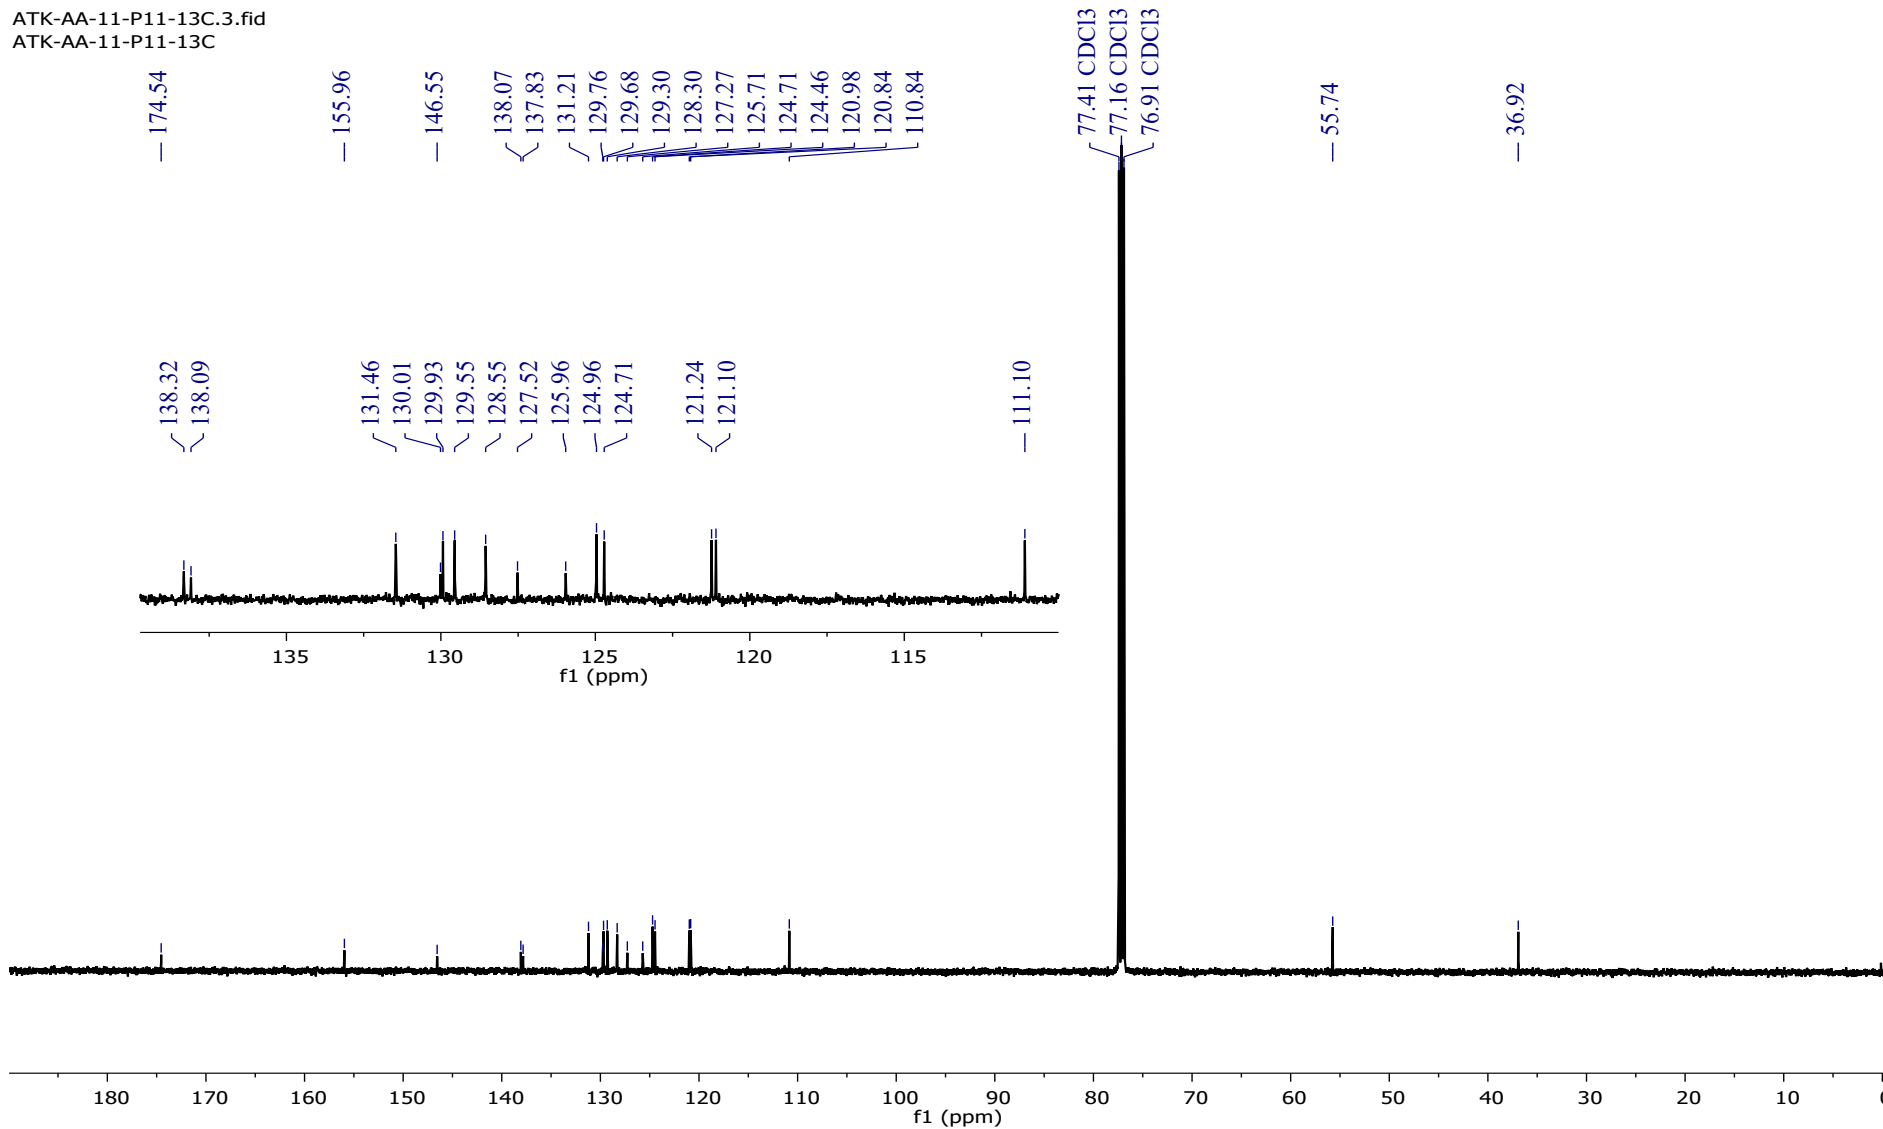

HRMS compound (3g)

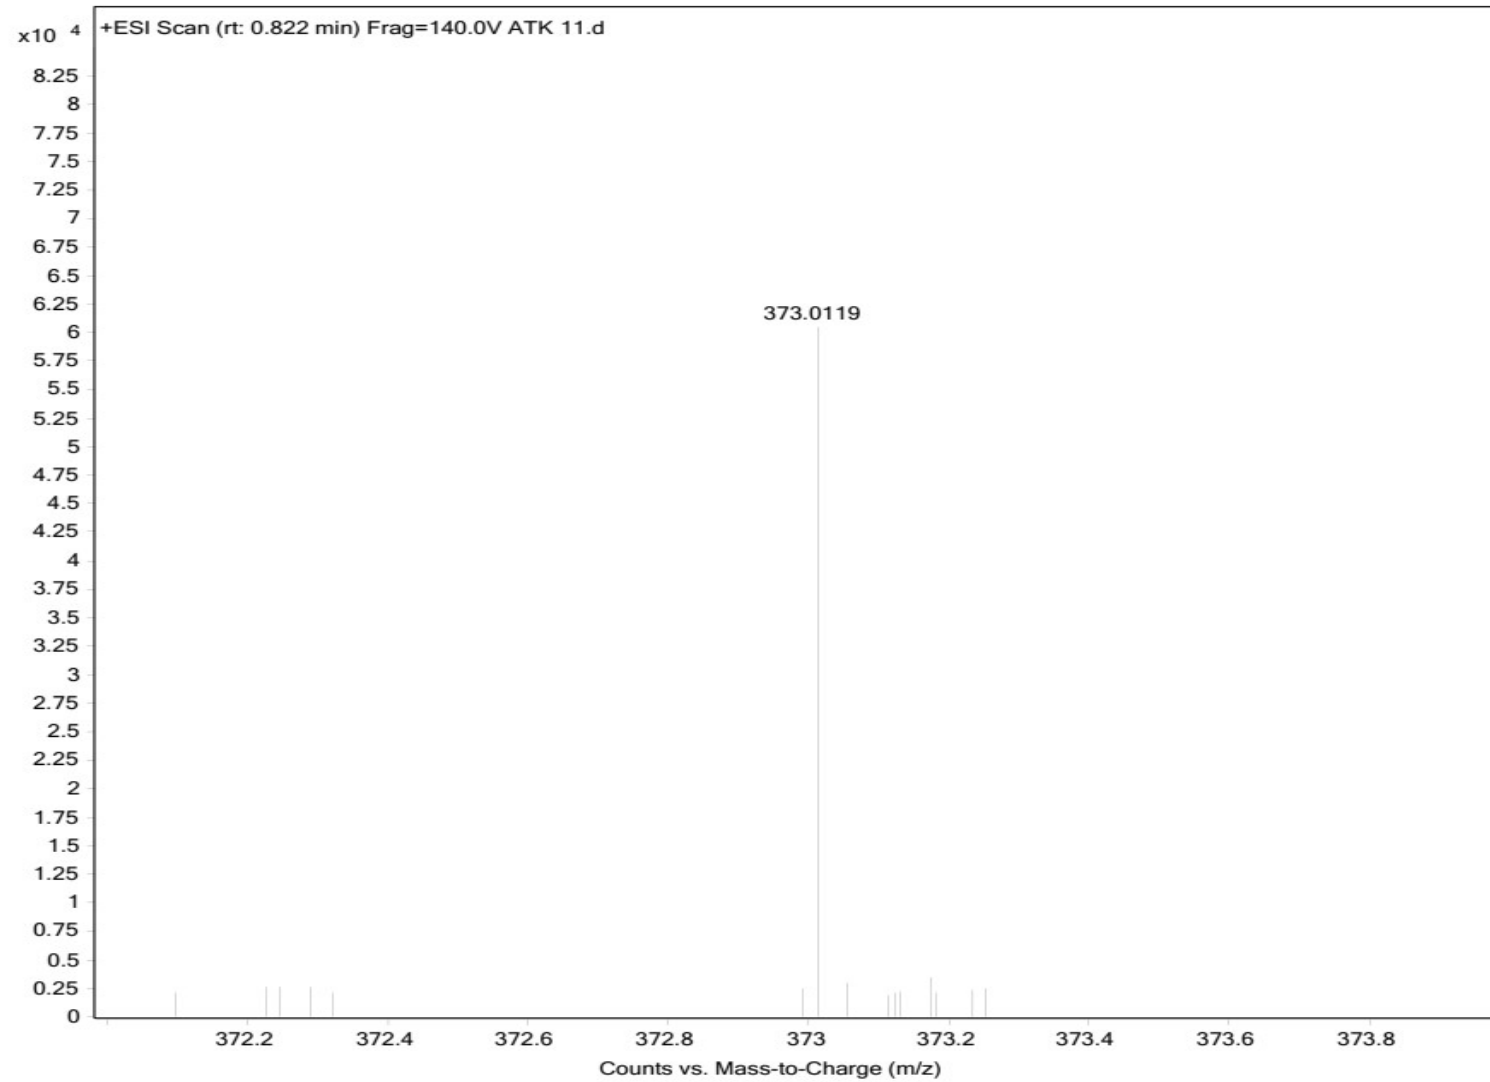

**<sup>1</sup>H NMR of compound (3h)**

ATK-AA-17-1H.4.fid — ATK-AA-17-1H

8.45  
8.43  
7.44  
7.43  
7.42  
7.41  
7.41  
7.41  
7.37  
7.34  
7.34  
7.29  
7.28  
7.28  
7.27  
7.26  
7.25  
6.91  
6.90  
6.90  
6.89  
6.87  
6.87  
5.94  
5.92  
5.92  
5.90  
5.33  
5.32

— 3.90

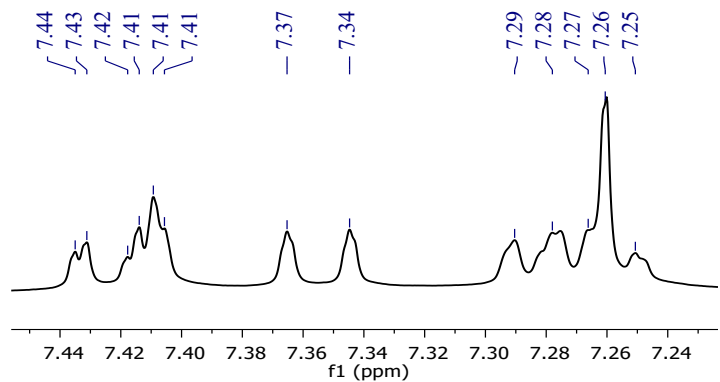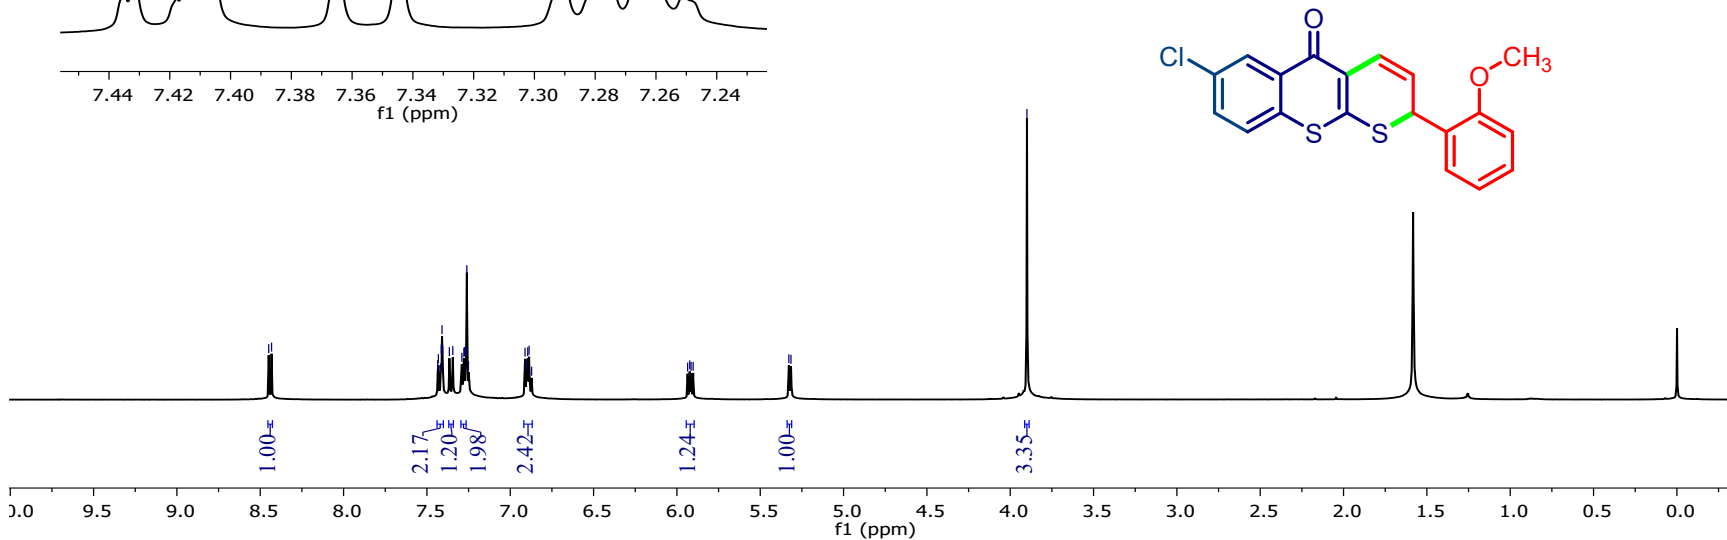

### <sup>13</sup>C NMR Compound (3h)

ATK-AA-17-1339\_5.fid  
ATK-AA-17-1339

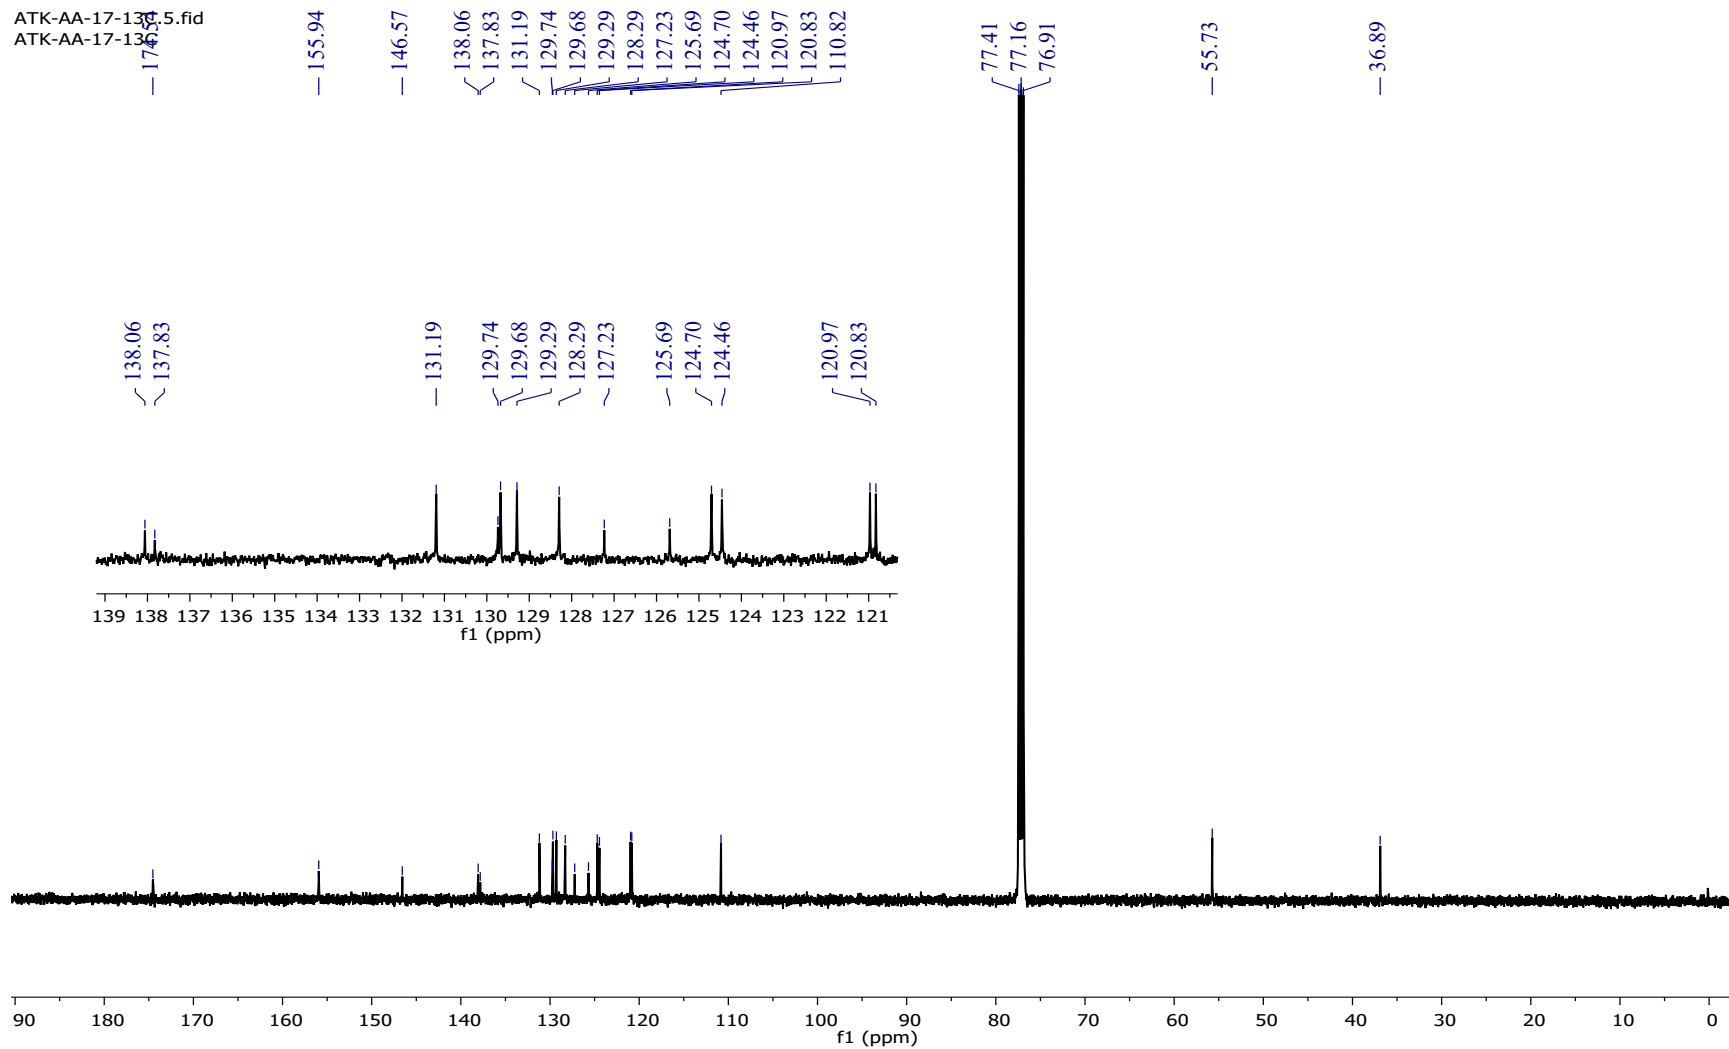

### HRMS of compound (3h)

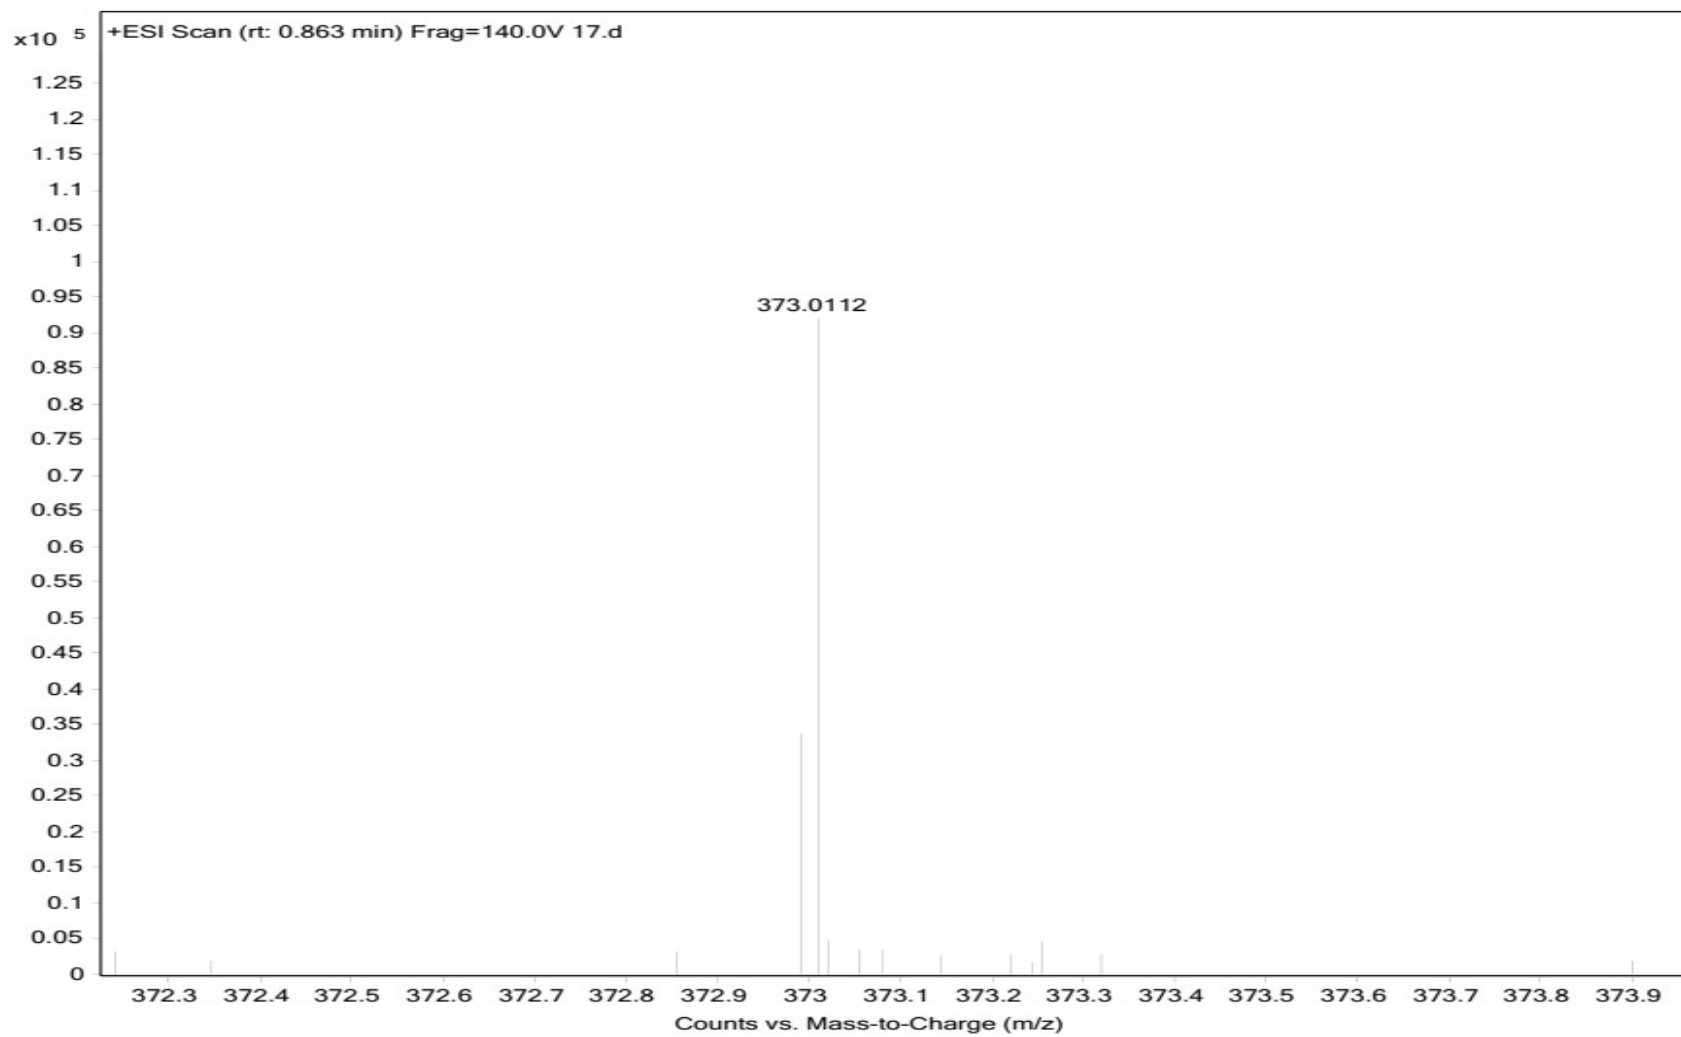

### <sup>1</sup>H NMR of compound (3i)

ATK-AA-127-1H.1.fid  
ATK-AA-127-1H

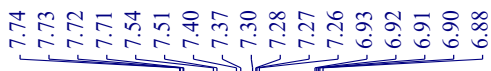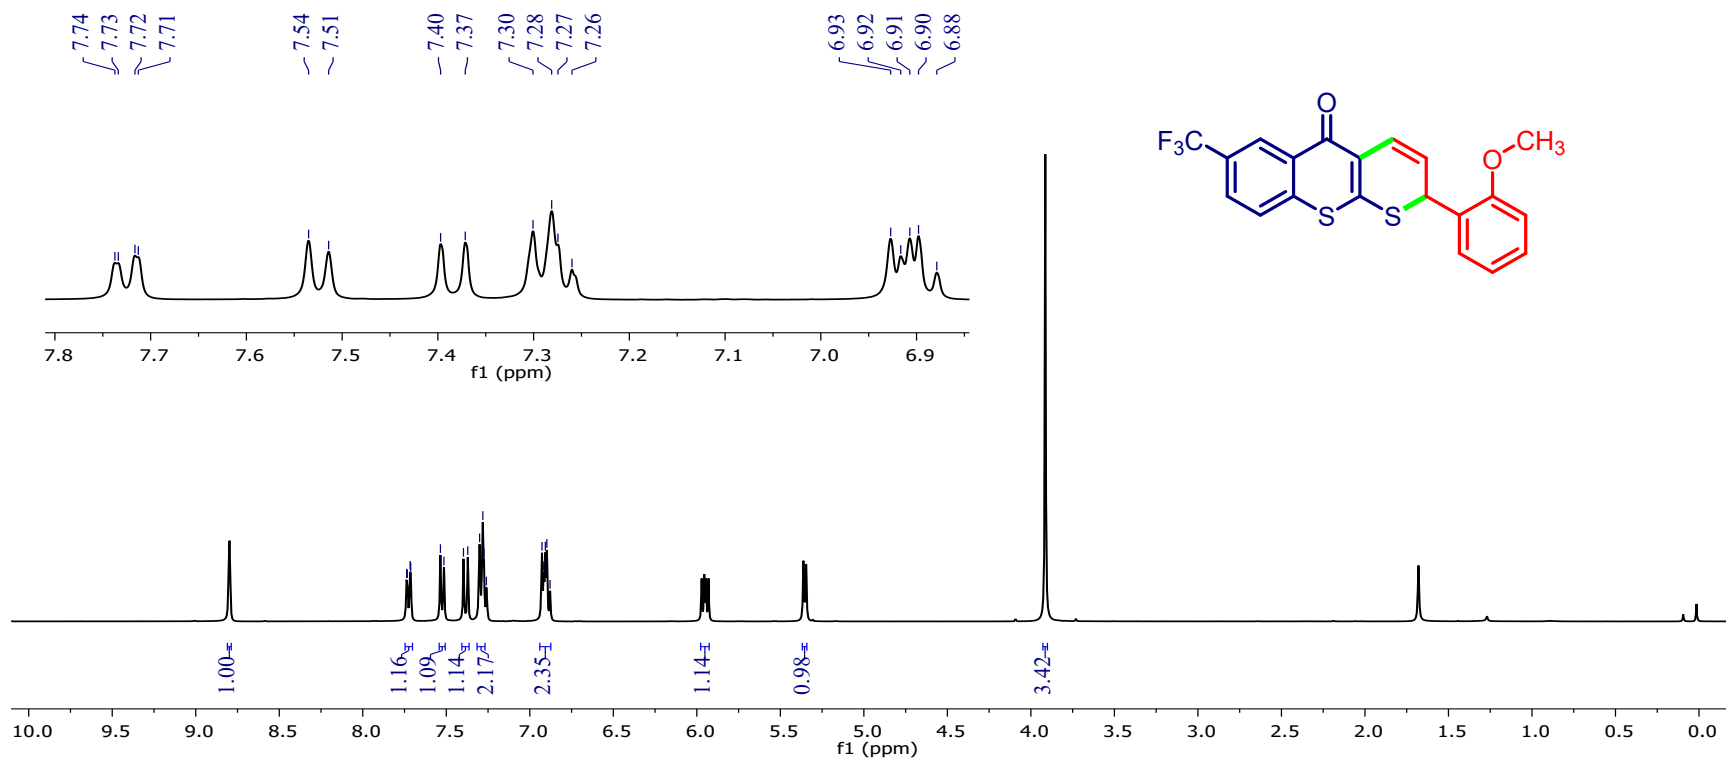

(400 MHz, Chloroform-*d*)  $\delta$  8.81 – 8.79 (m, 1H), 7.75 – 7.70 (m, 1H), 7.52 (d,  $J = 8.4$  Hz, 1H), 7.38 (d,  $J = 10.3$  Hz, 1H), 7.32 – 7.27 (m, 2H), 6.94 – 6.87 (m, 2H), 5.95 (dd,  $J = 10.3, 6.3$  Hz, 1H), 5.35 (d,  $J = 6.2$  Hz, 1H), 3.91 (s, 3H).



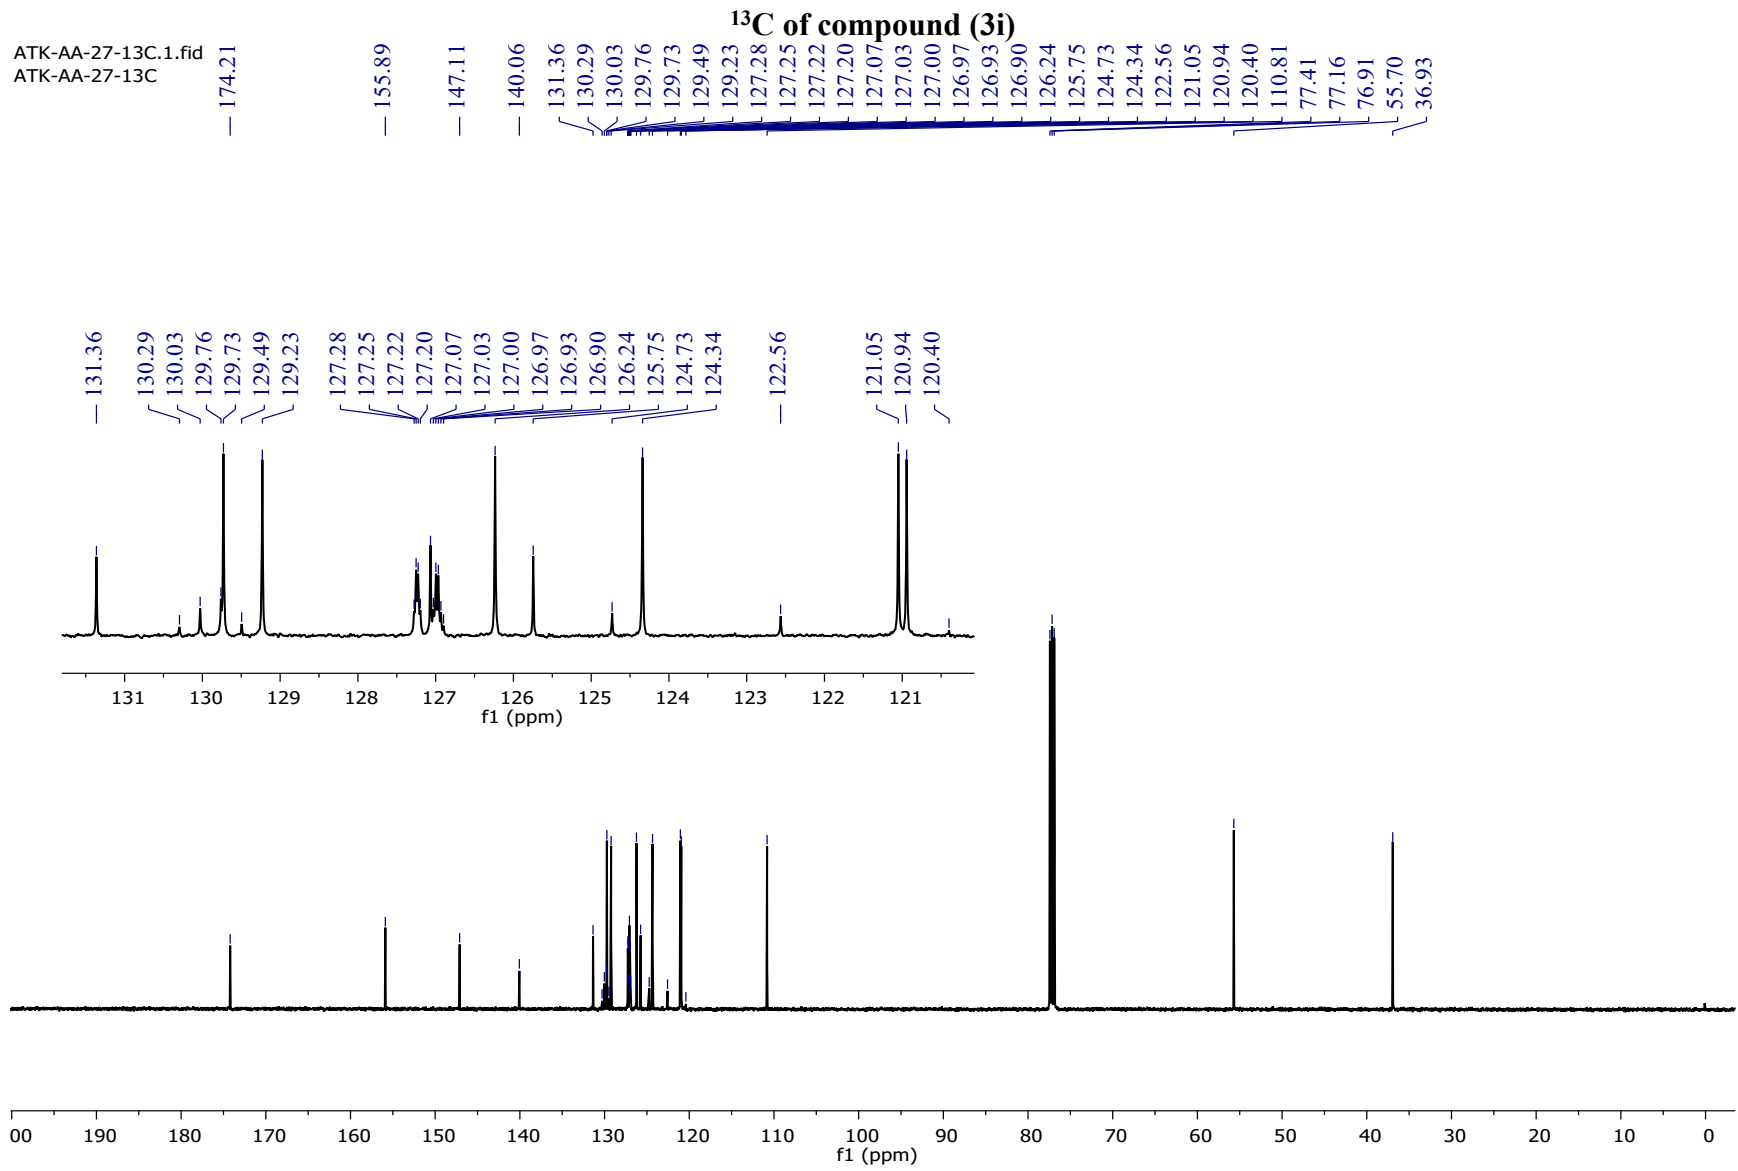

# HRMS 3i

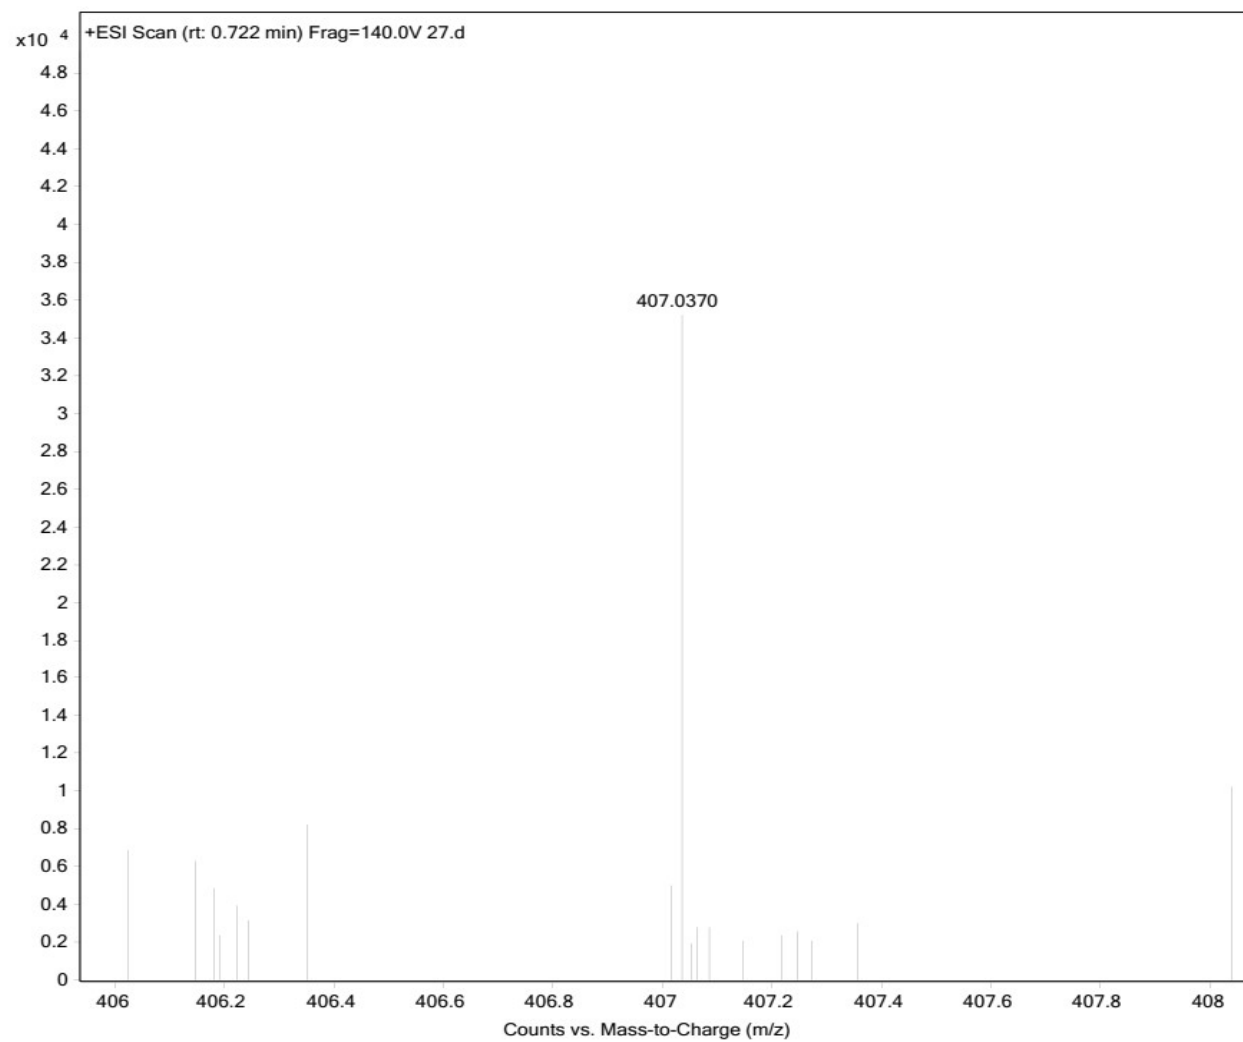

# <sup>1</sup>H NMR Compound (3j)

ATK-AA-8-1H.3.fid — ATK-AA-8-1H

8.44  
8.42  
7.44  
7.43  
7.42  
7.41  
7.37  
7.36  
7.34  
7.32  
7.32  
7.32  
7.30  
7.29  
7.29  
7.27  
7.27  
7.26  
6.01  
6.00  
5.99  
5.98  
4.96  
4.95

7.44  
7.43  
7.42  
7.41  
7.37  
7.36  
7.34  
7.32  
7.32  
7.32  
7.30  
7.29  
7.29  
7.27  
7.27  
7.26

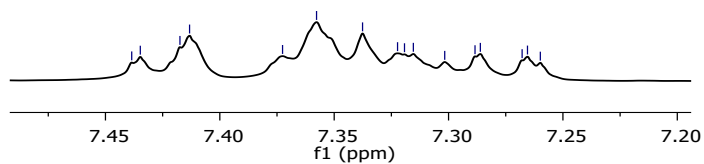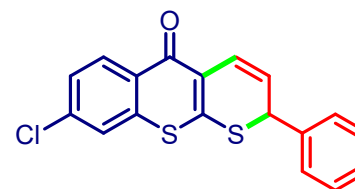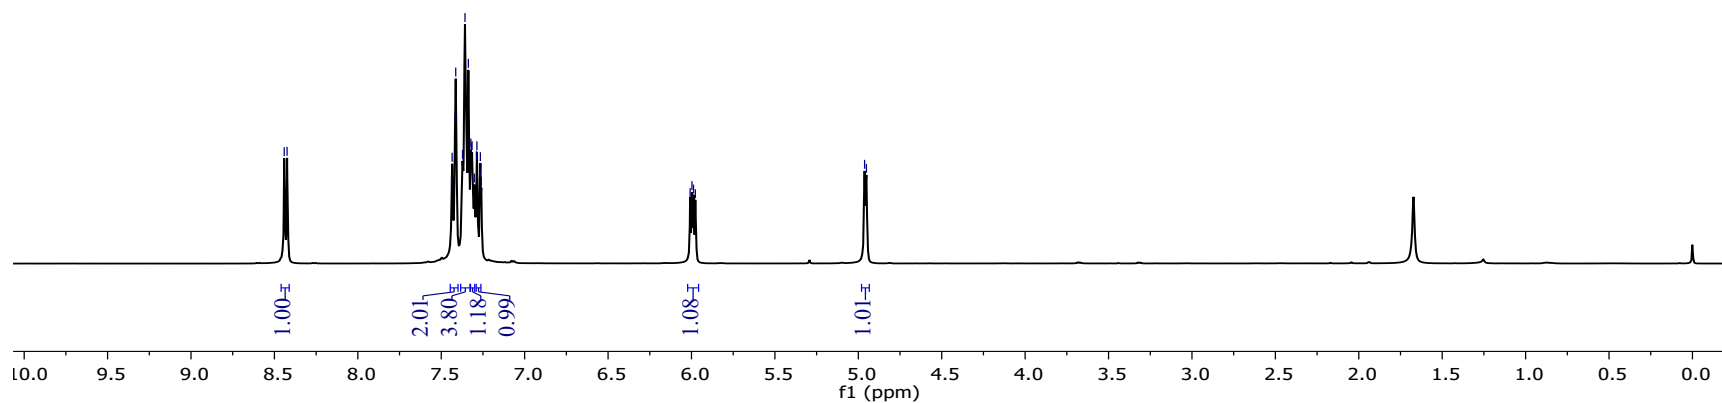

### <sup>13</sup>C NMR Compound (a3j)

ATK-AA-8-13C.1.fid  
ATK-AA-8-13C

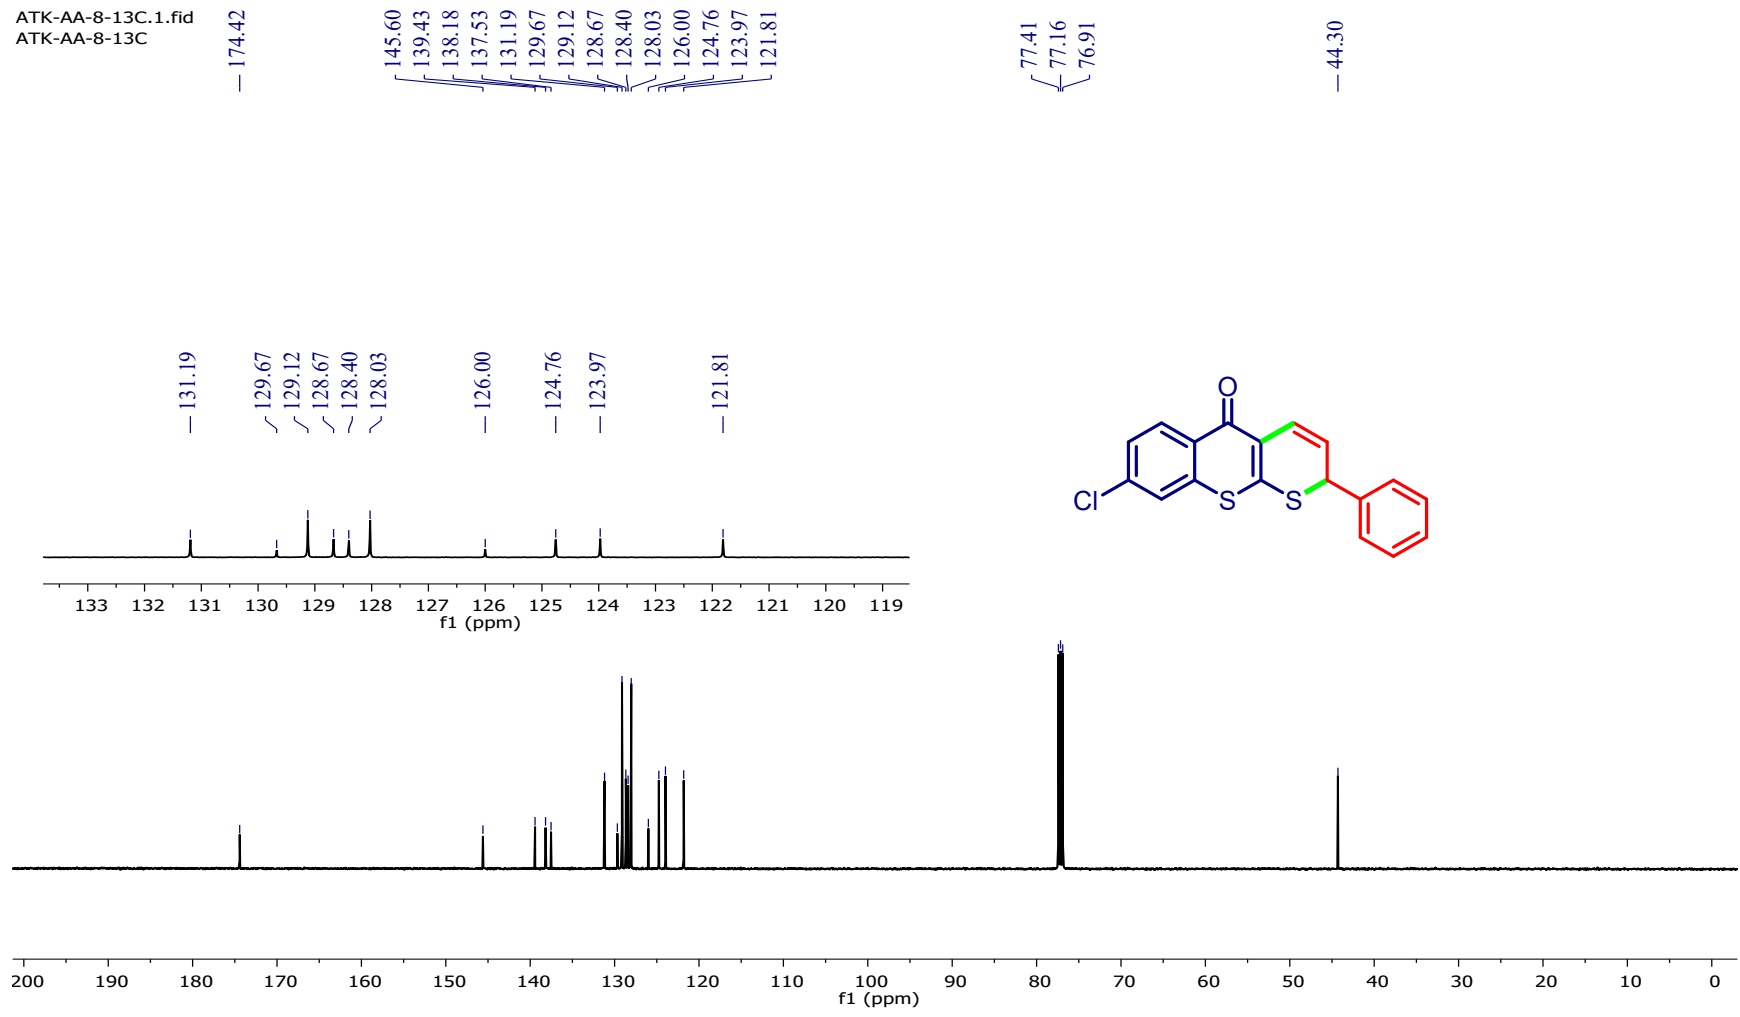

# HRMS of 3j

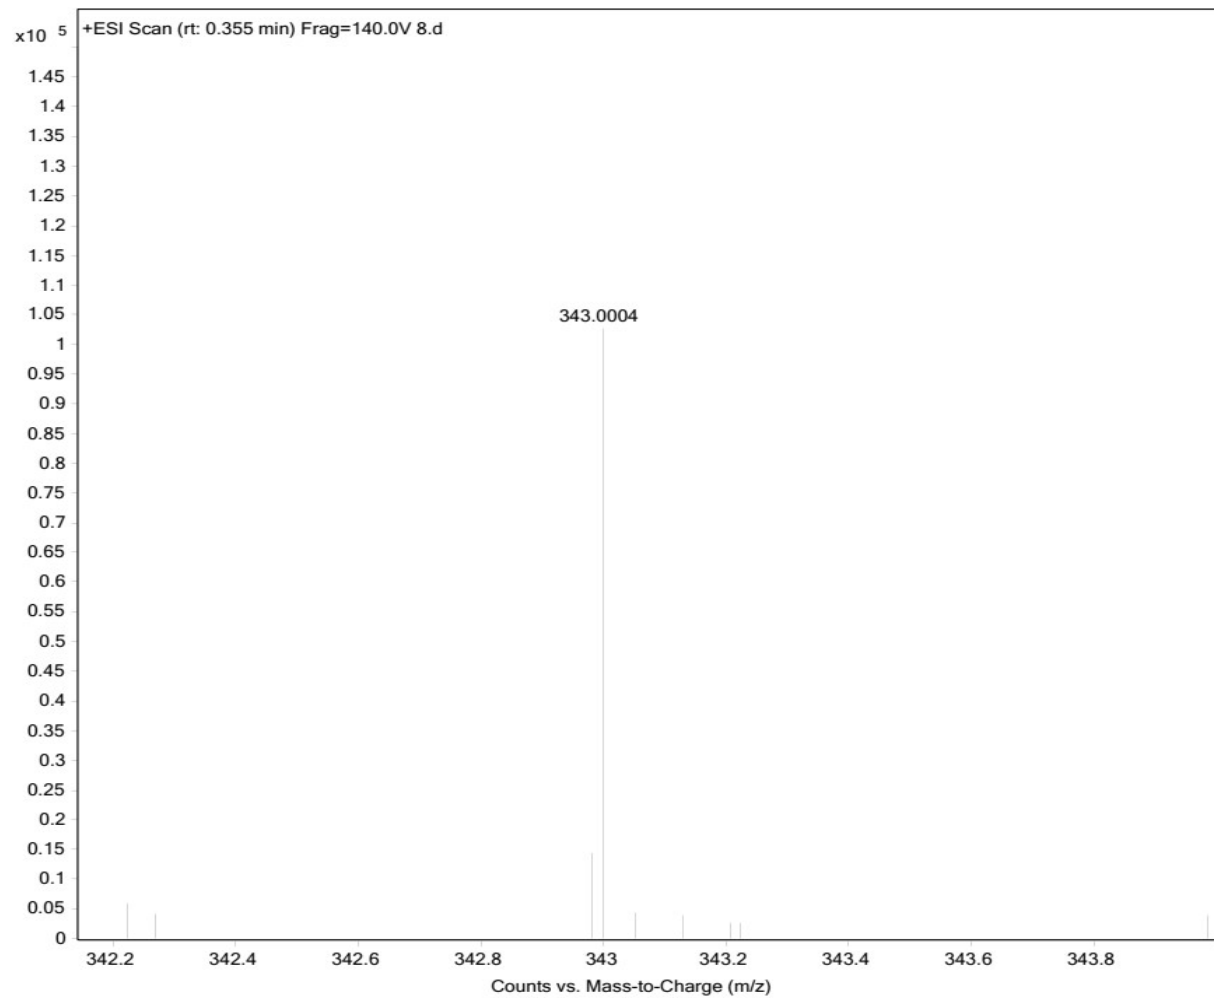

**<sup>1</sup>H NMR Compound (3k)**

ATK-AA-13-P2A13  
ATK-AA-13-P2A13

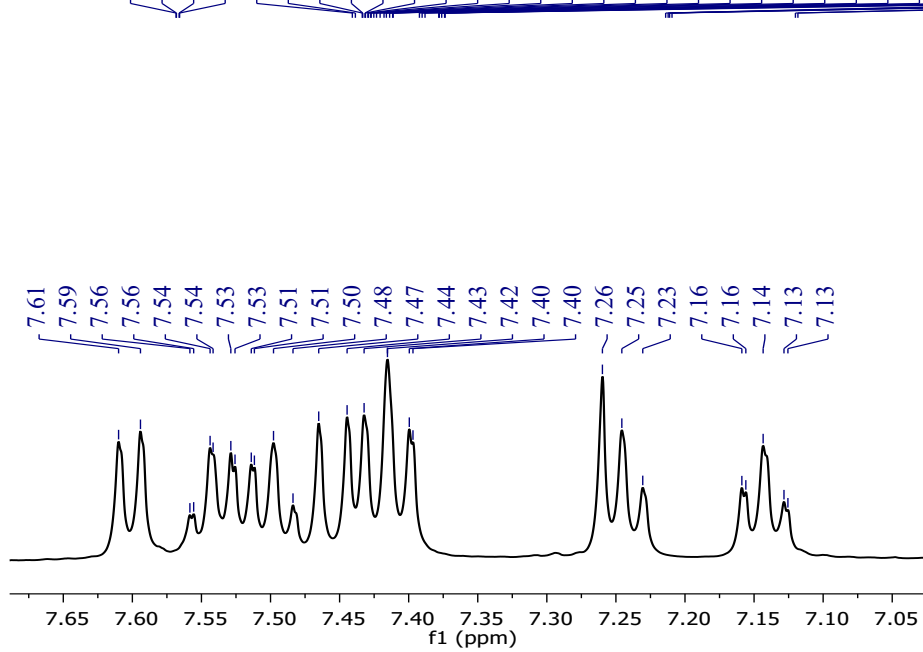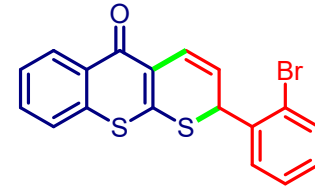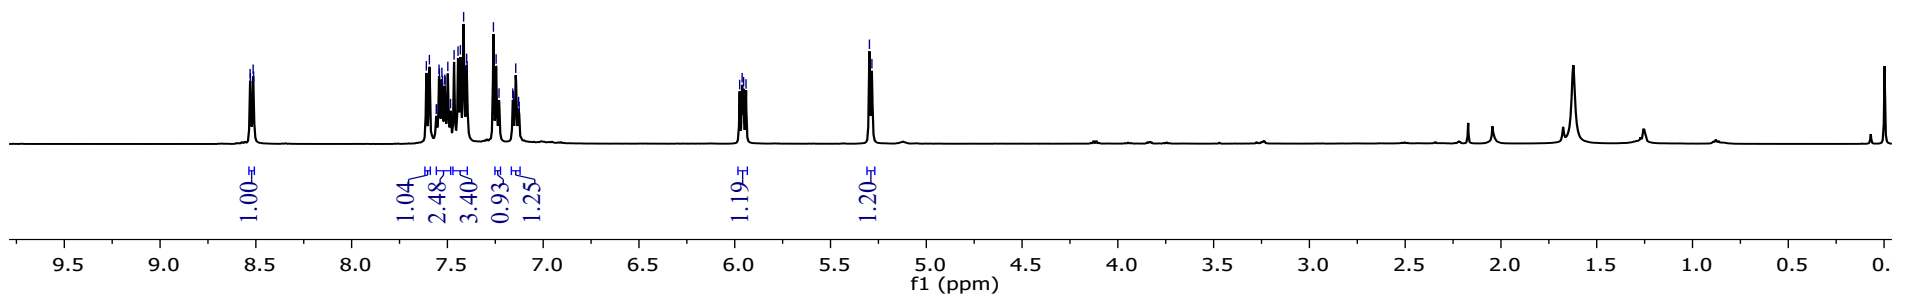

**<sup>1</sup>H NMR Compound (3k)**



ATK-AA-13-P2A13-13C.3.fid  
ATK-AA-13-P2A13-13C

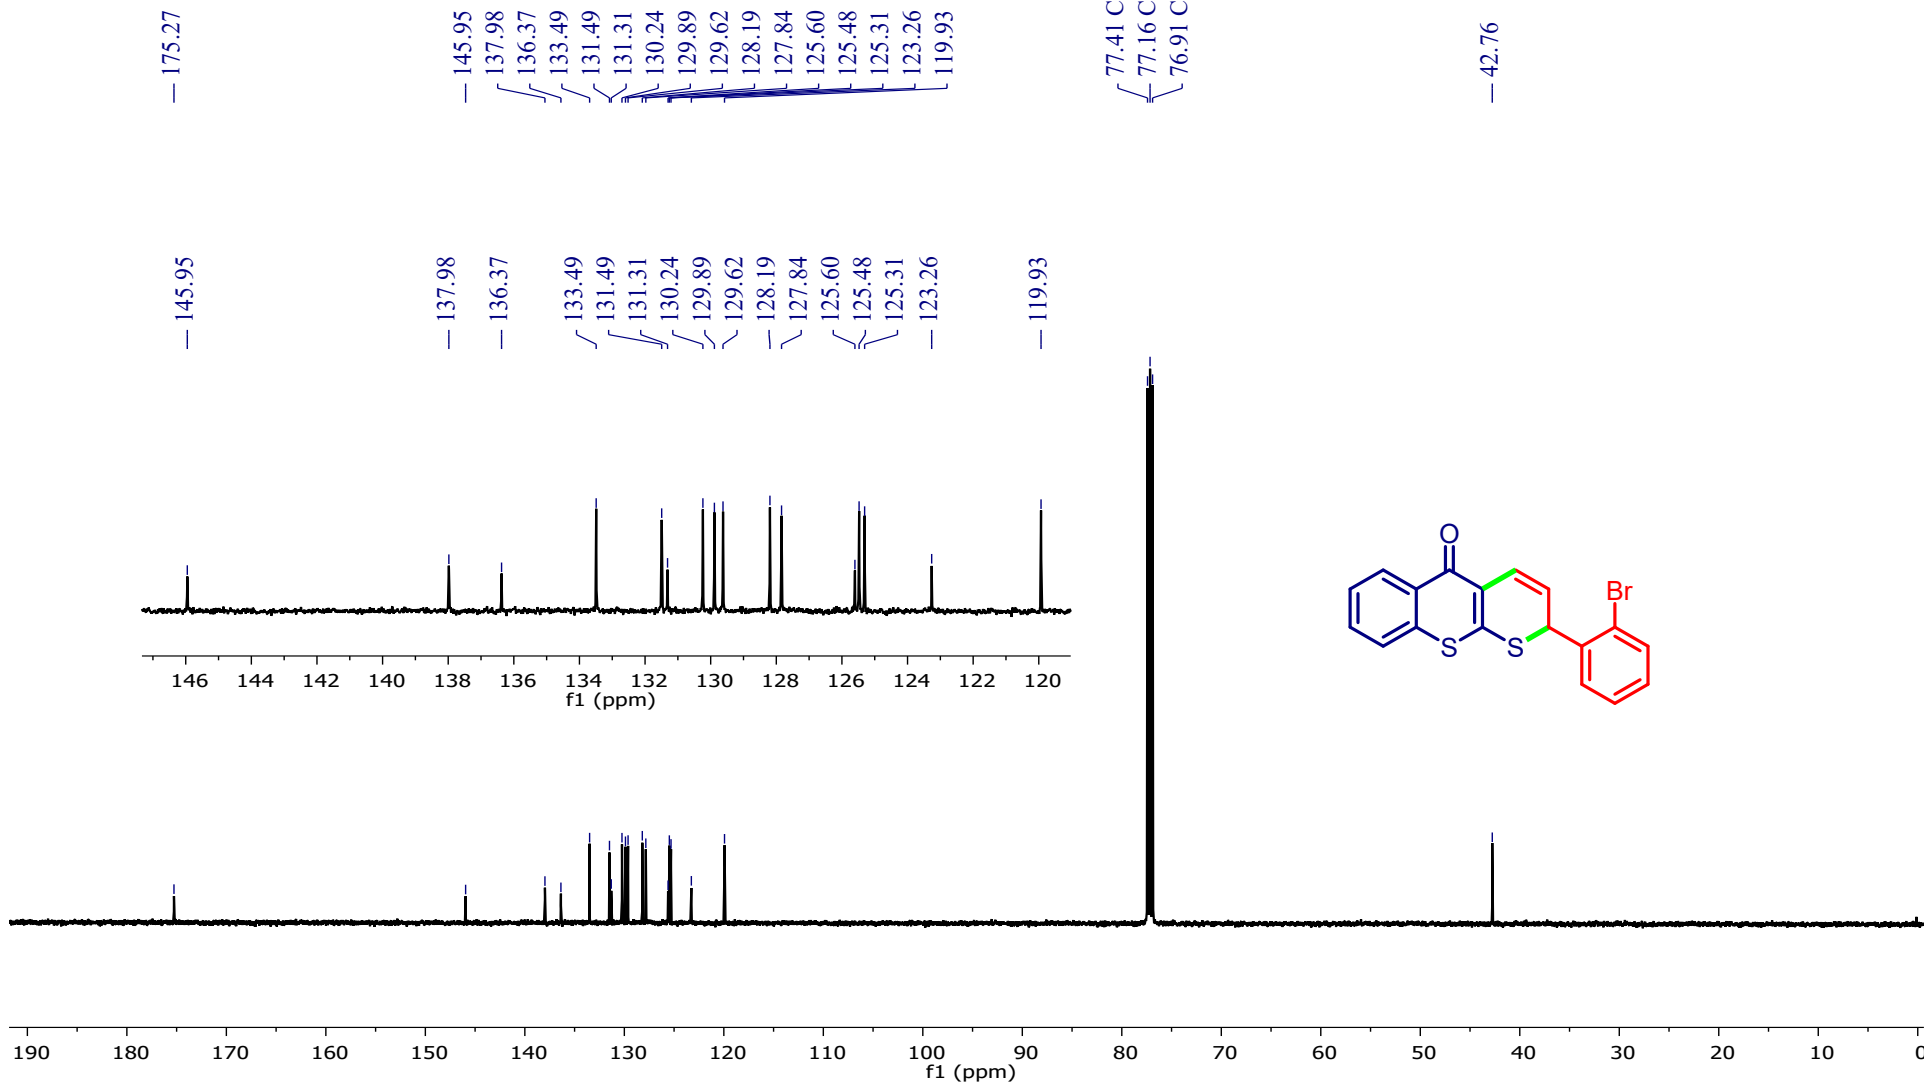

### HRMS Compound (3k)

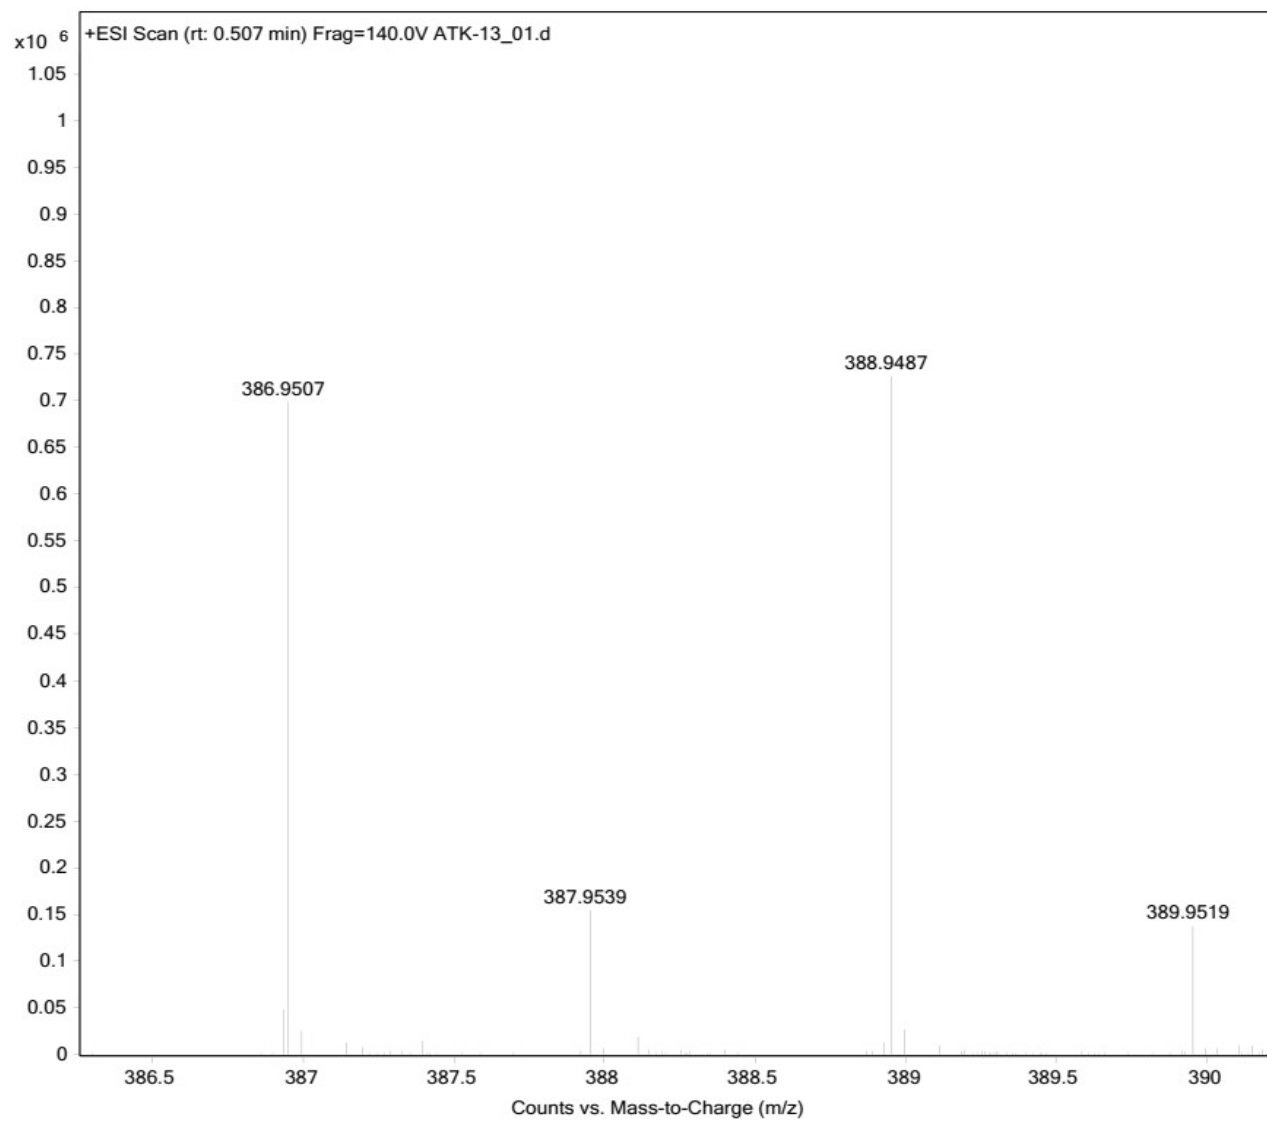

# <sup>1</sup>H NMR Compound (3l)

ATK-AA-24-1H.1.fid  
ATK-AA-24-1H

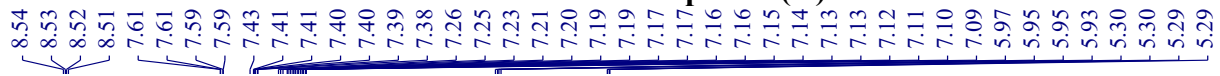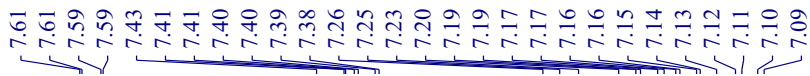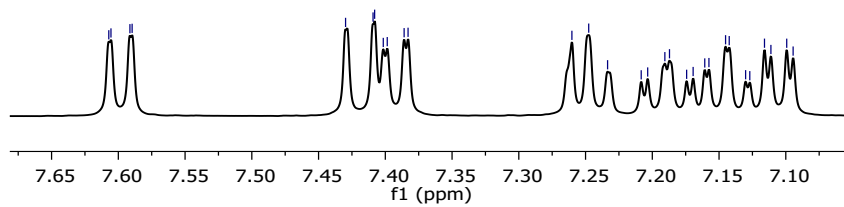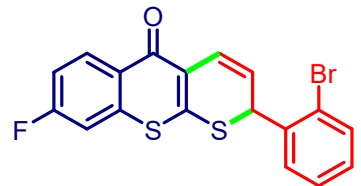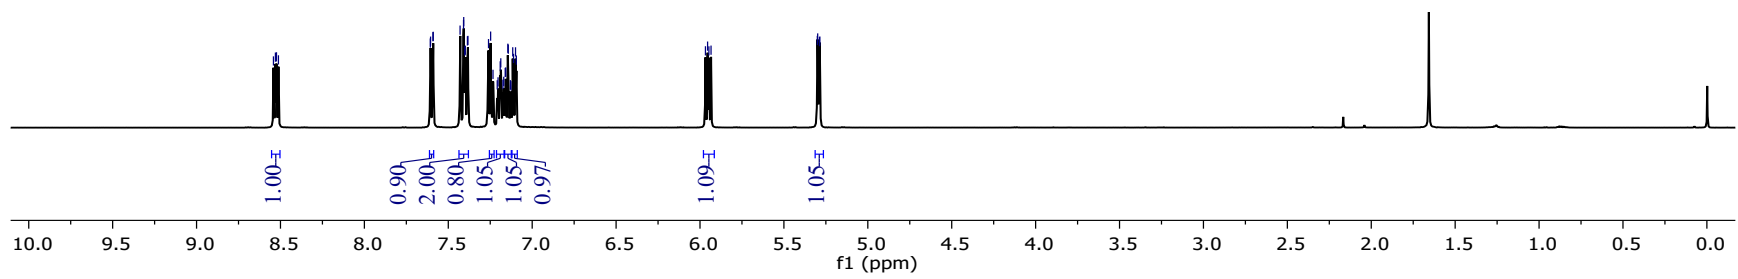

ATK-AA-24-13C.5.fid  
ATK-AA-24-13C

### <sup>13</sup>C NMR Compound (3l)

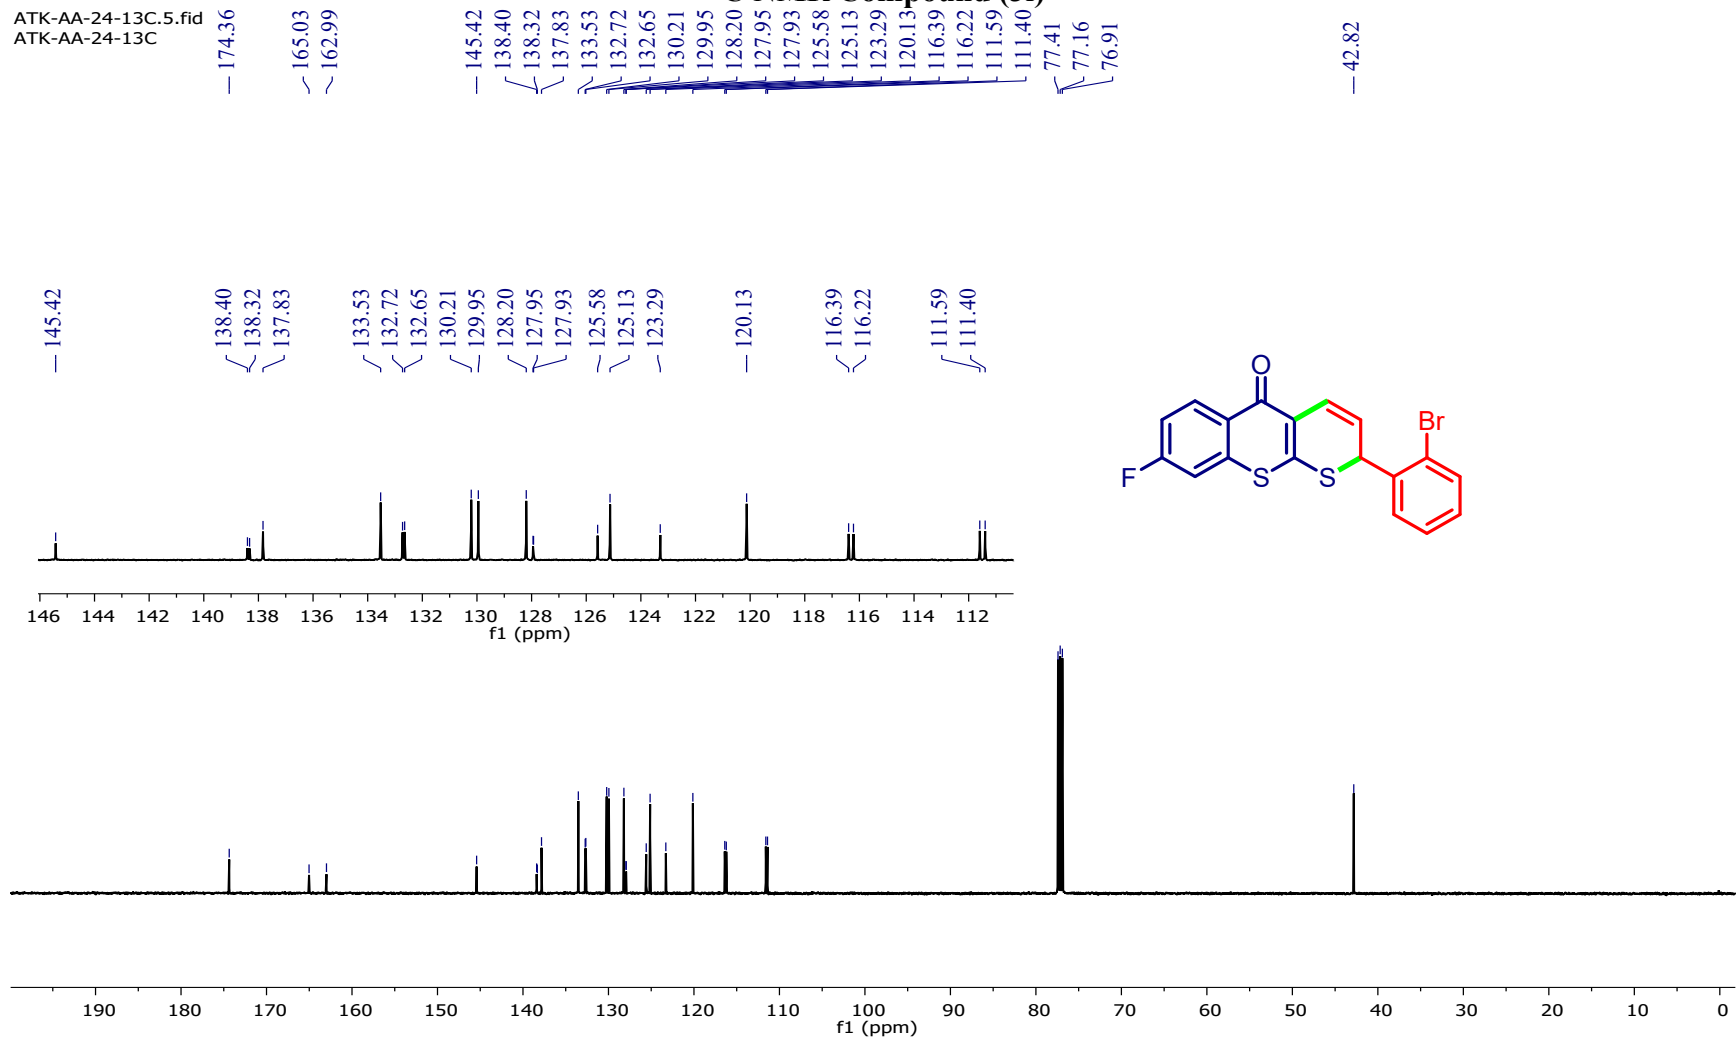

# HRMS (31)

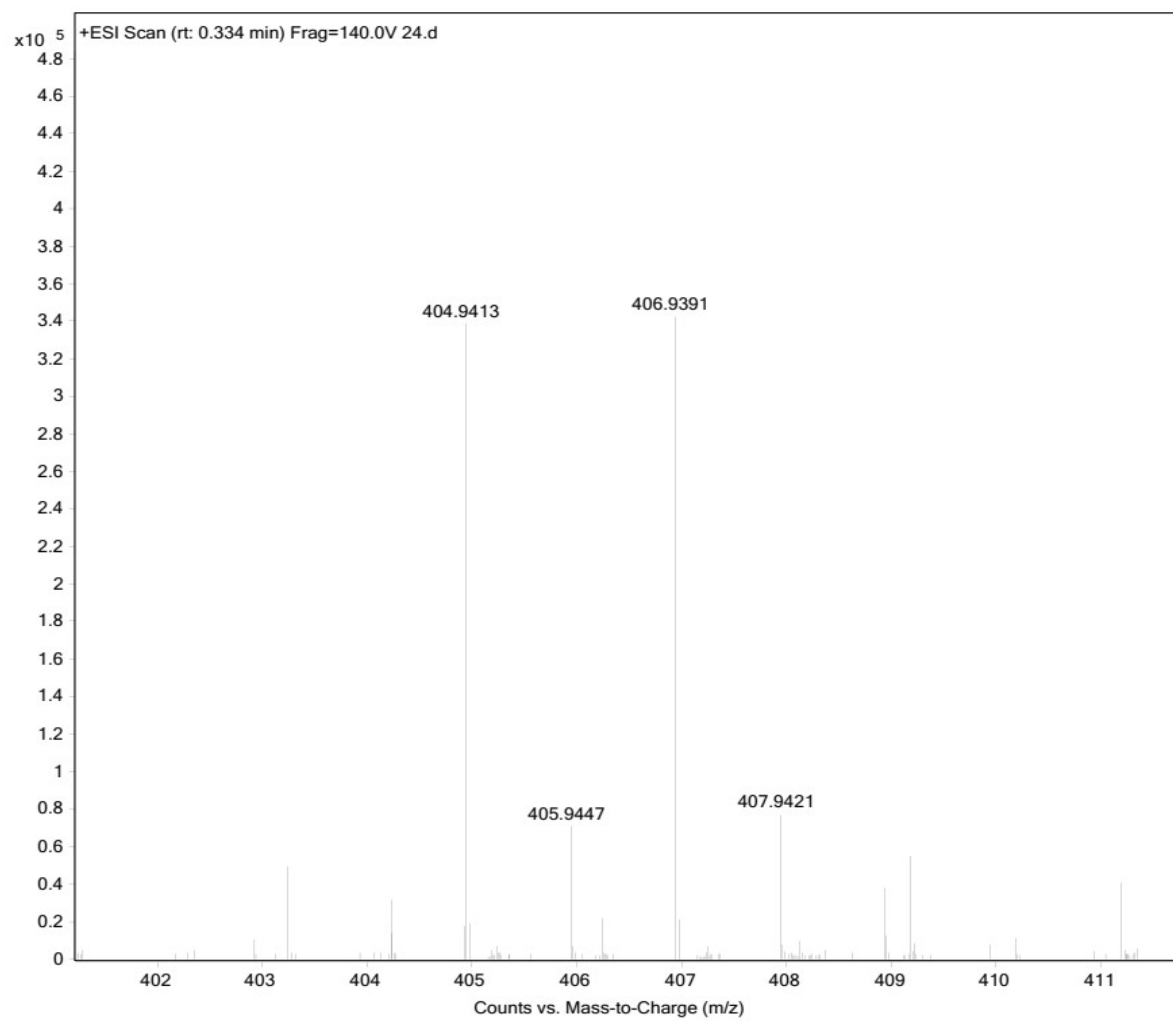

# <sup>1</sup>H NMR of compound (3m)

MPO-AA-30-11-15-110  
MPO-AA-30-11-15-110  
7.77  
7.76  
7.75  
7.75  
7.64  
7.62  
7.57  
7.55  
7.47  
7.45  
7.42  
7.41  
7.40  
7.40  
7.29  
7.28  
7.26  
7.26  
7.19  
7.17  
7.16  
6.02  
6.01  
6.00  
5.99  
5.35  
5.34

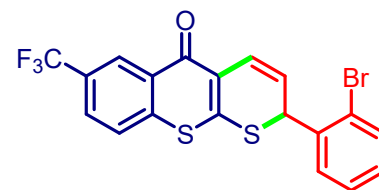

7.77  
7.76  
7.75  
7.75  
7.64  
7.62  
7.57  
7.55  
7.47  
7.45  
7.42  
7.41  
7.40  
7.40  
7.29  
7.28  
7.26  
7.26  
7.19  
7.17  
7.16

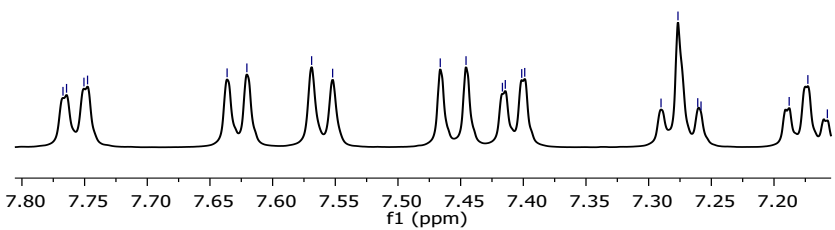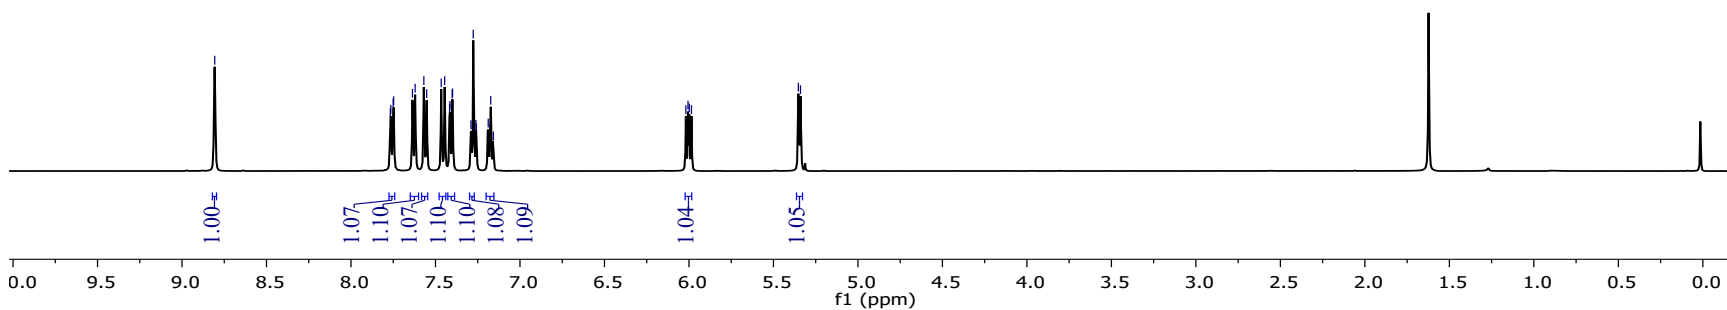

# <sup>13</sup>C of compound (3m)

MPO-AA-30-13C.1.fid  
MPO-AA-30-13C

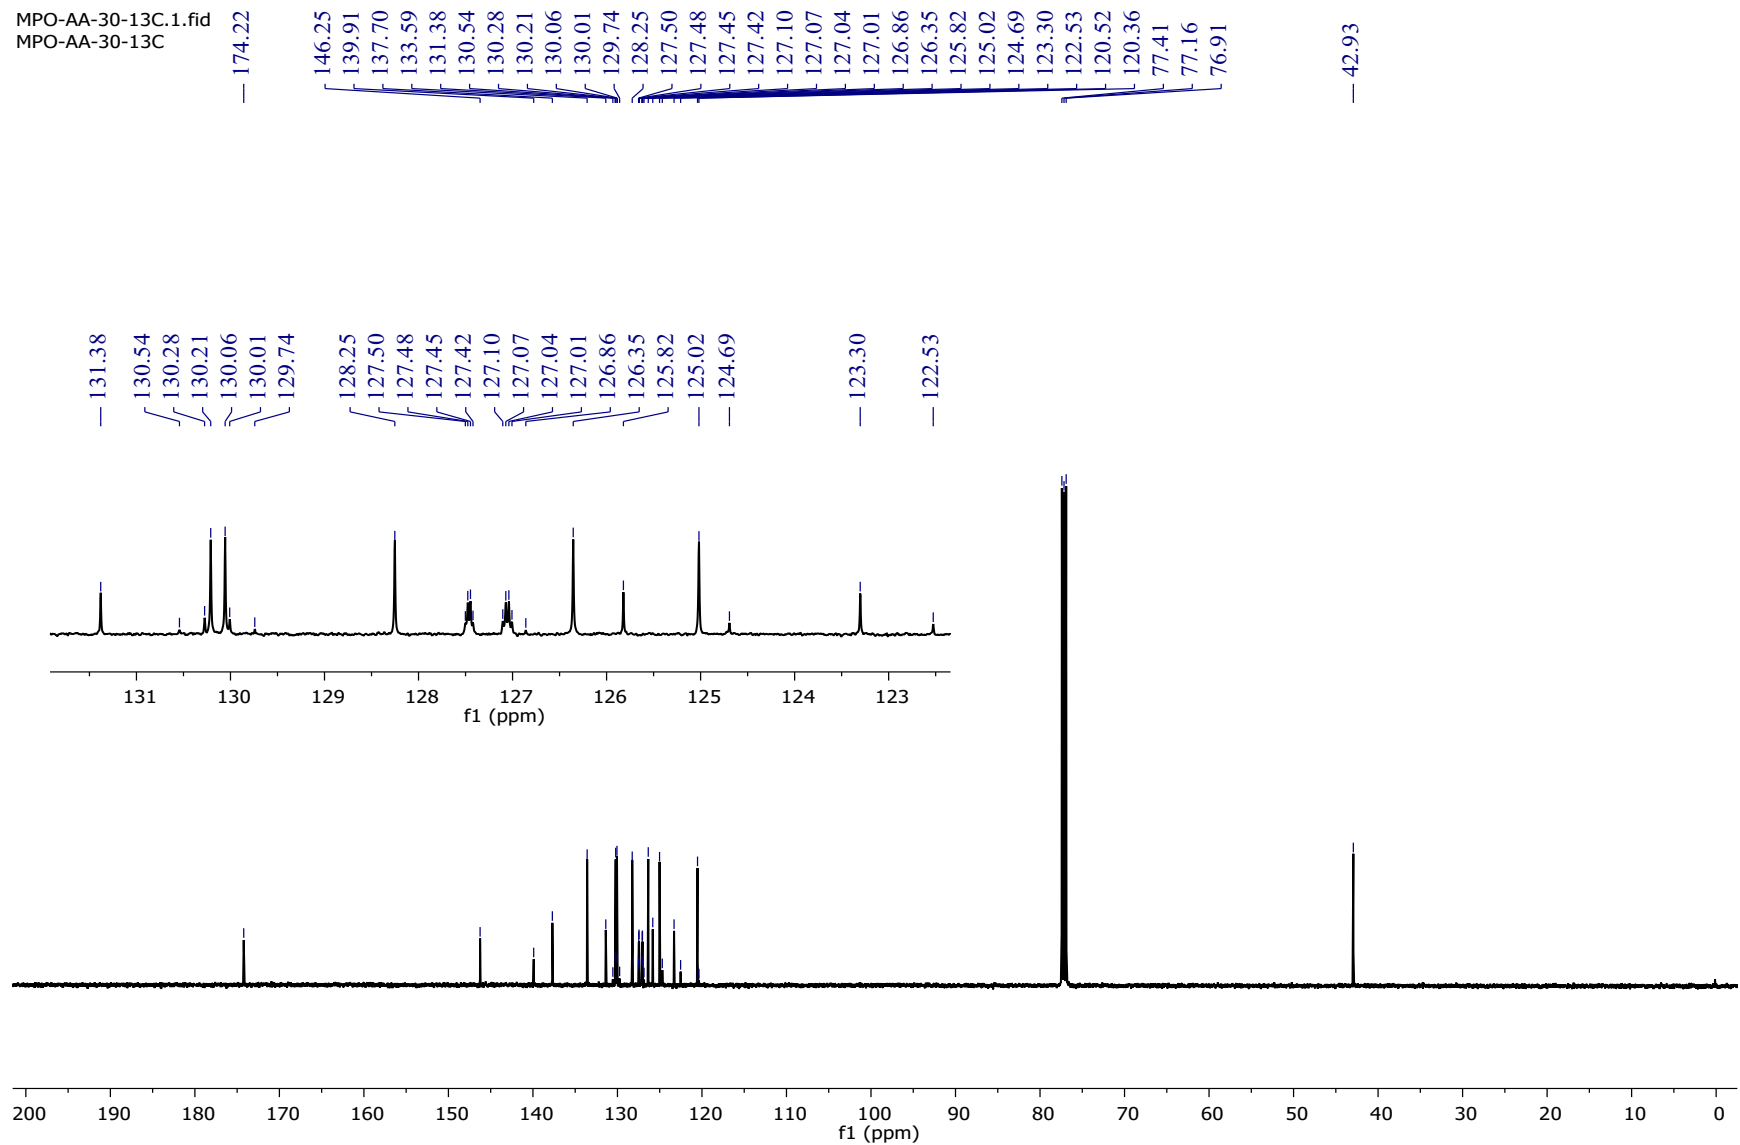

# HRMS of 3m

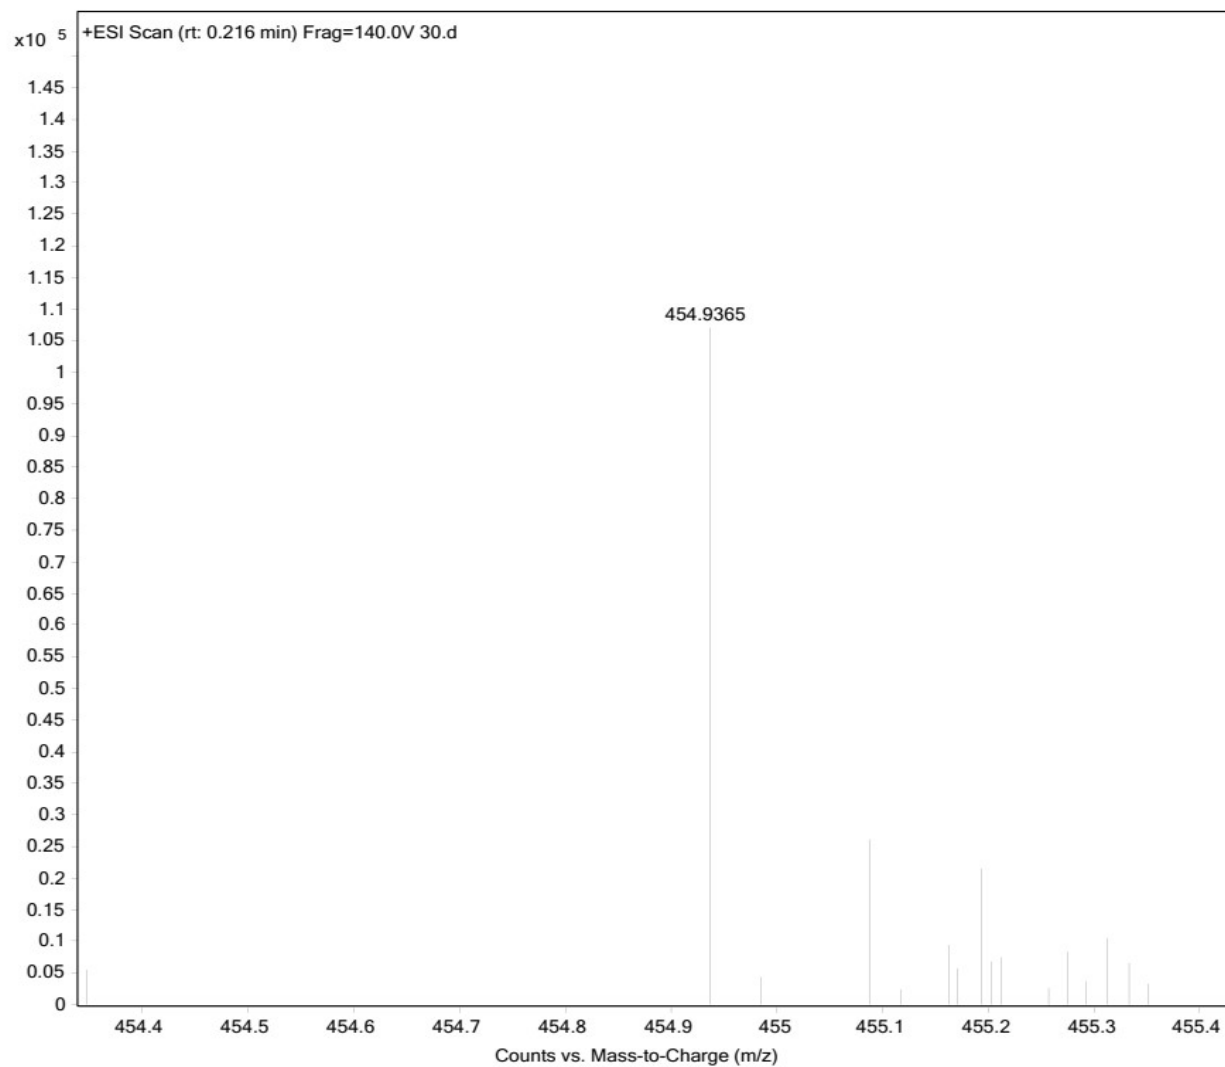



# <sup>1</sup>H NMR Compound (n)

ATK-AA-18-1H.1.fid  
ATK-AA-18-1H

8.45  
8.43  
7.62  
7.61  
7.60  
7.60  
7.45  
7.45  
7.43  
7.43  
7.42  
7.42  
7.41  
7.40  
7.40  
7.39  
7.38  
7.27  
7.27  
7.26  
7.17  
7.17  
7.16  
7.15  
7.14  
7.14  
5.98  
5.96  
5.95  
5.31  
5.30

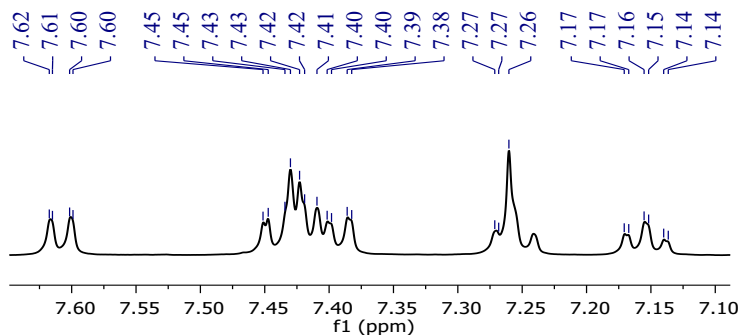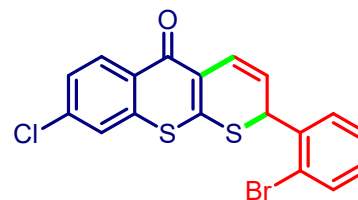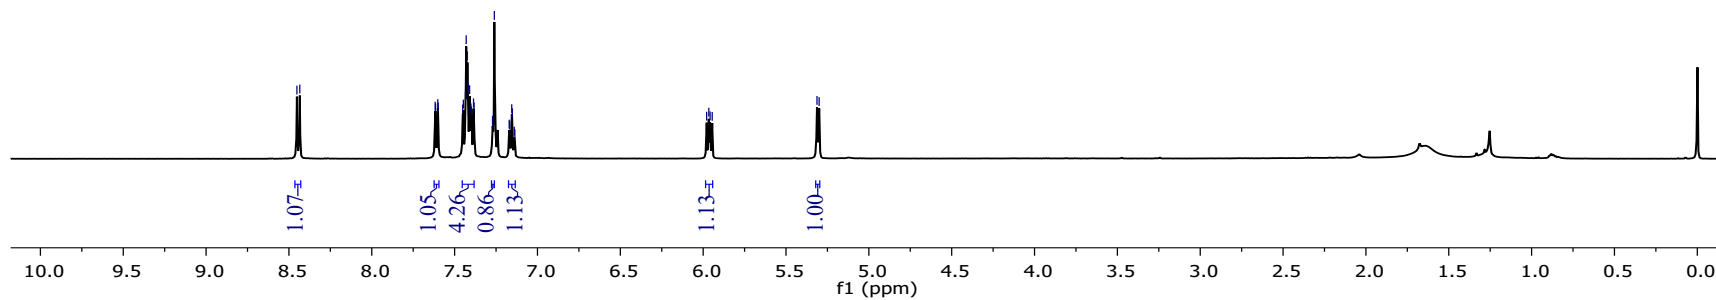

### <sup>13</sup>C NMR Compound (3n)

ATK-AA-18-13C.1.fid  
ATK-AA-18-13C

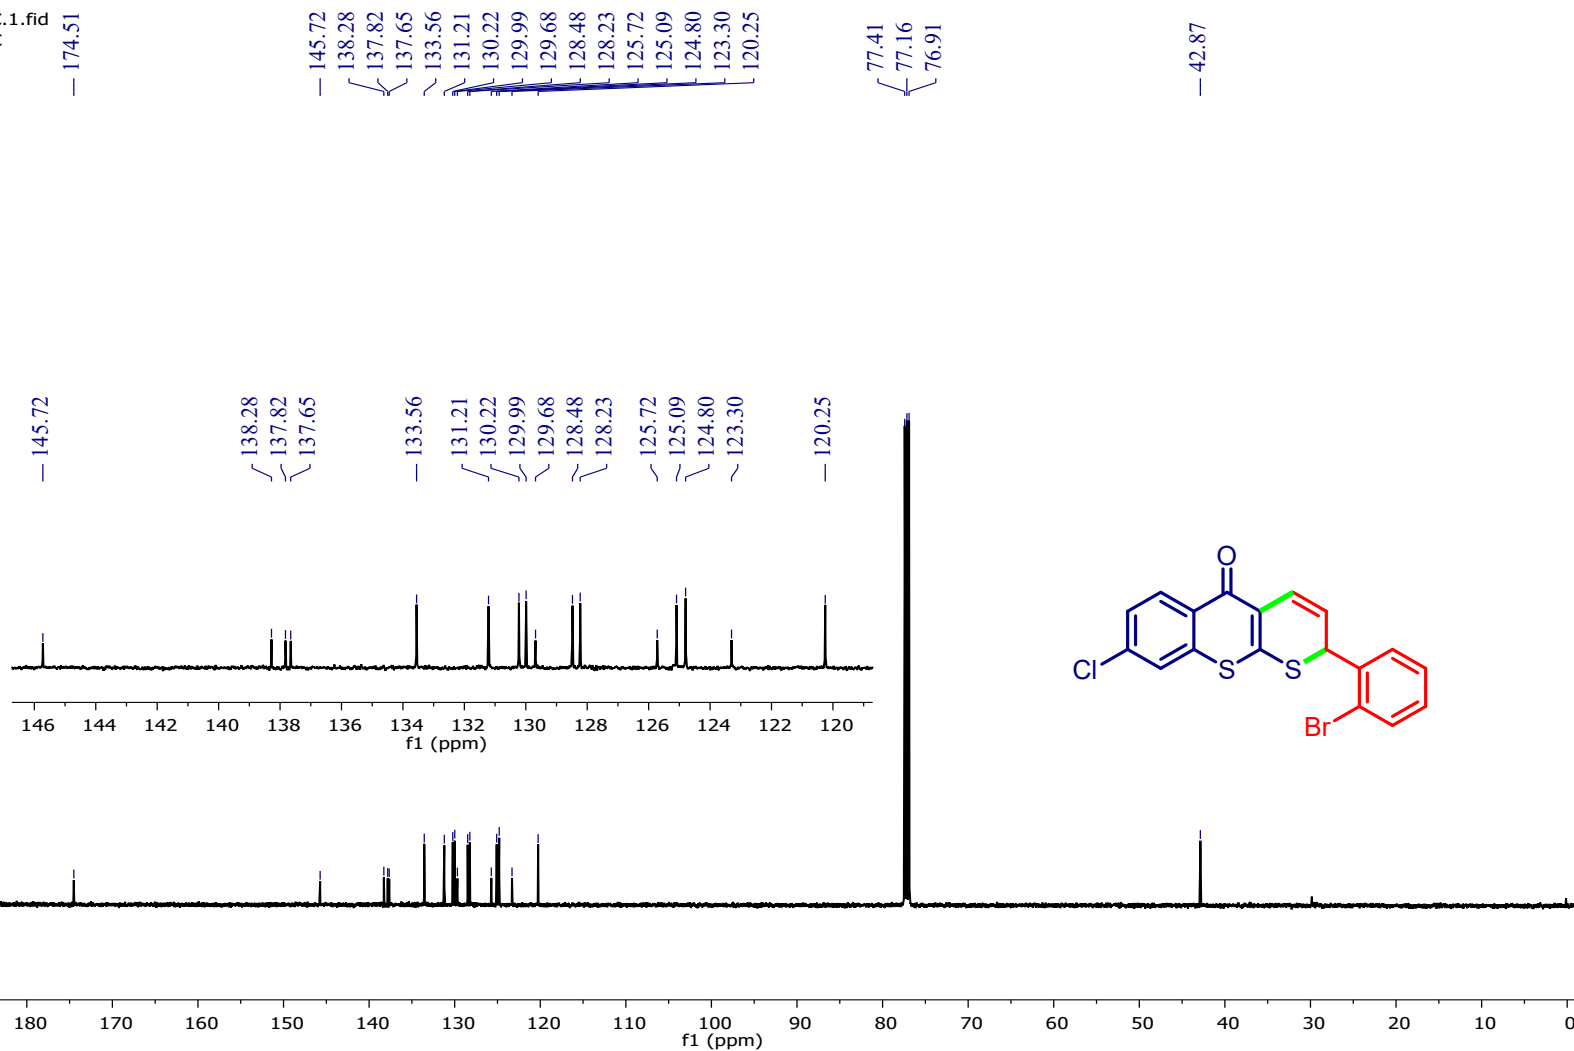

(125 MHz, Chloroform-*d*)  $\delta$  174.5, 145.7, 138.2, 137.8, 137.6, 133.5, 131.2, 130.2, 129.9, 129.6, 128.4, 128.2, 125.7, 125.0, 124.8, 123.3, 120.2, 42.8.

### HRMS of 3n

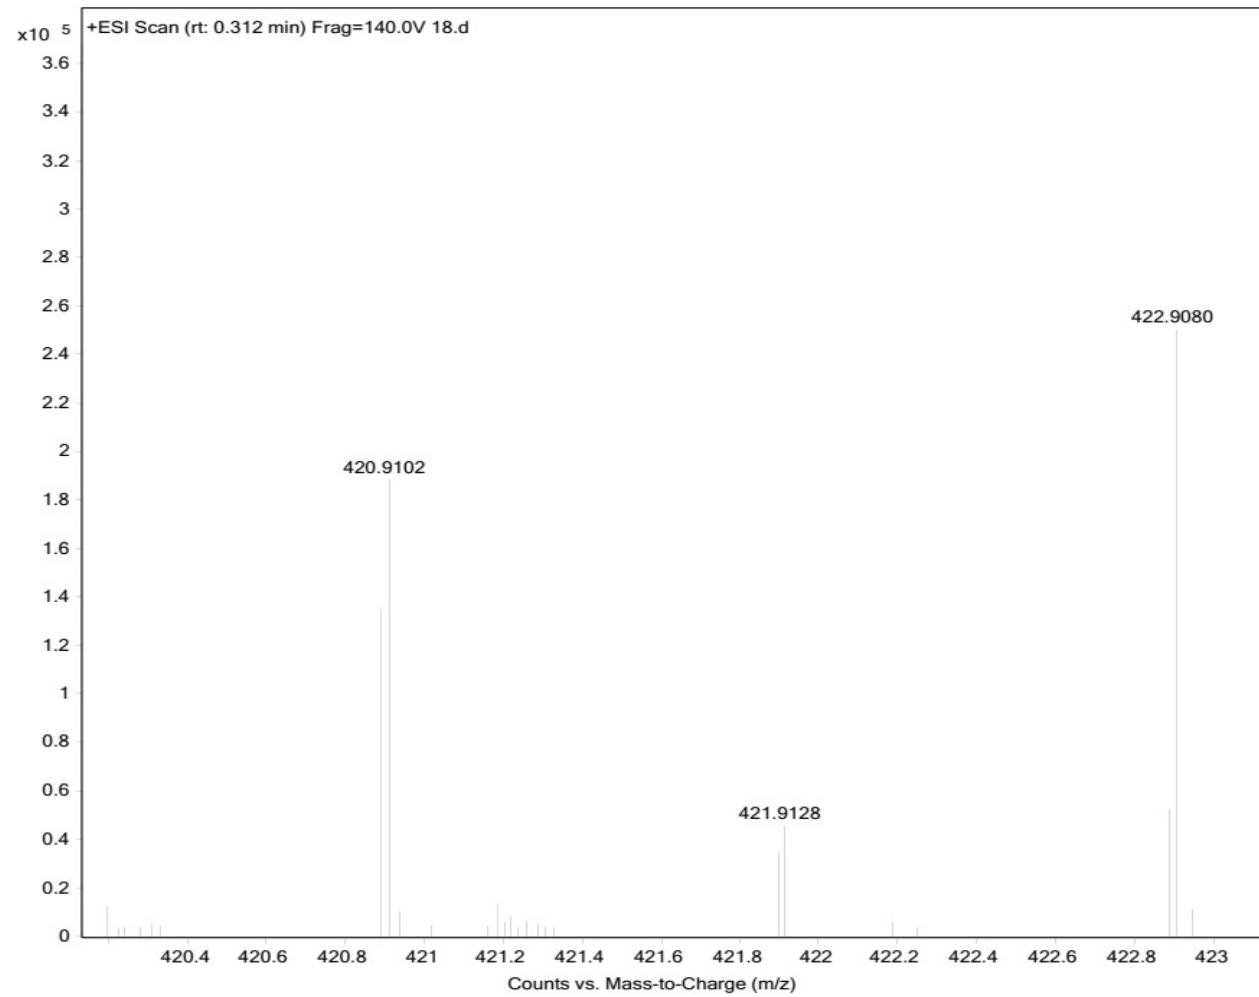

# <sup>1</sup>H NMR Compound (3o)

ATK-AA-25-1H.1.fid — ATK-AA-25-1H

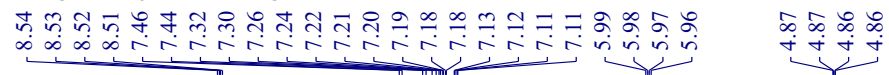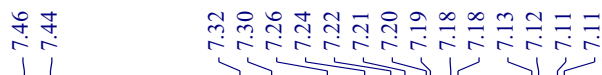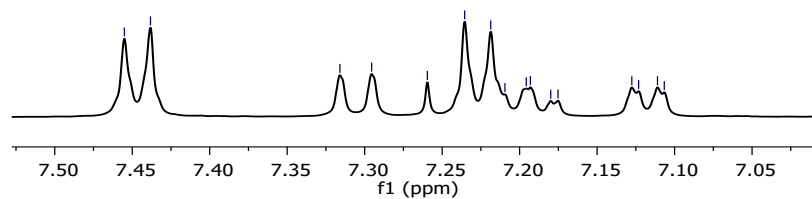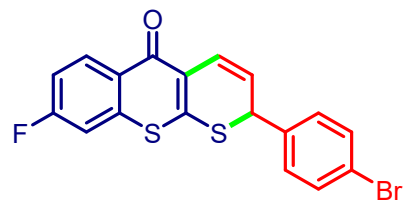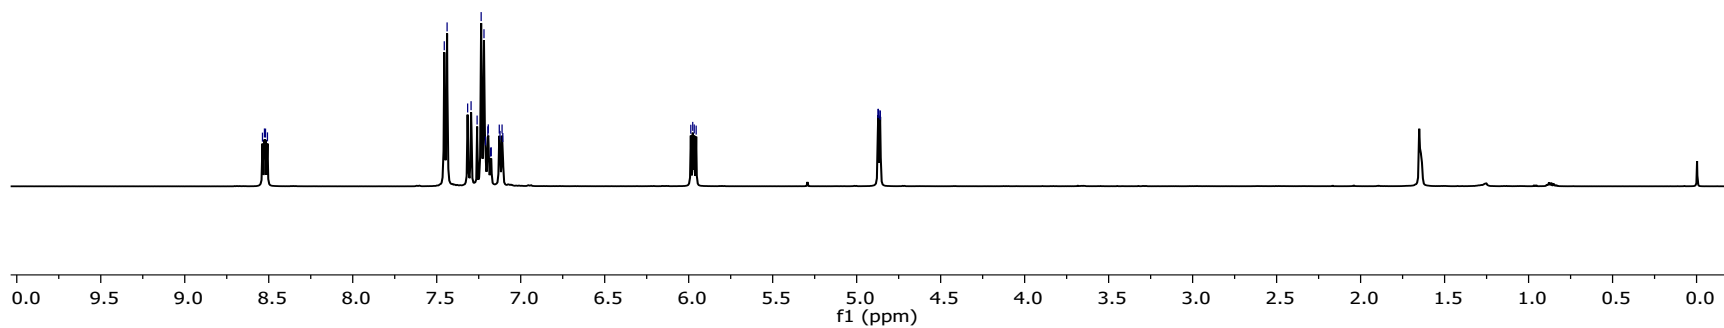

**<sup>13</sup>C NMR Compound (3o)**

ATK-AA-25-13C.5.fid  
ATK-AA-25-13C

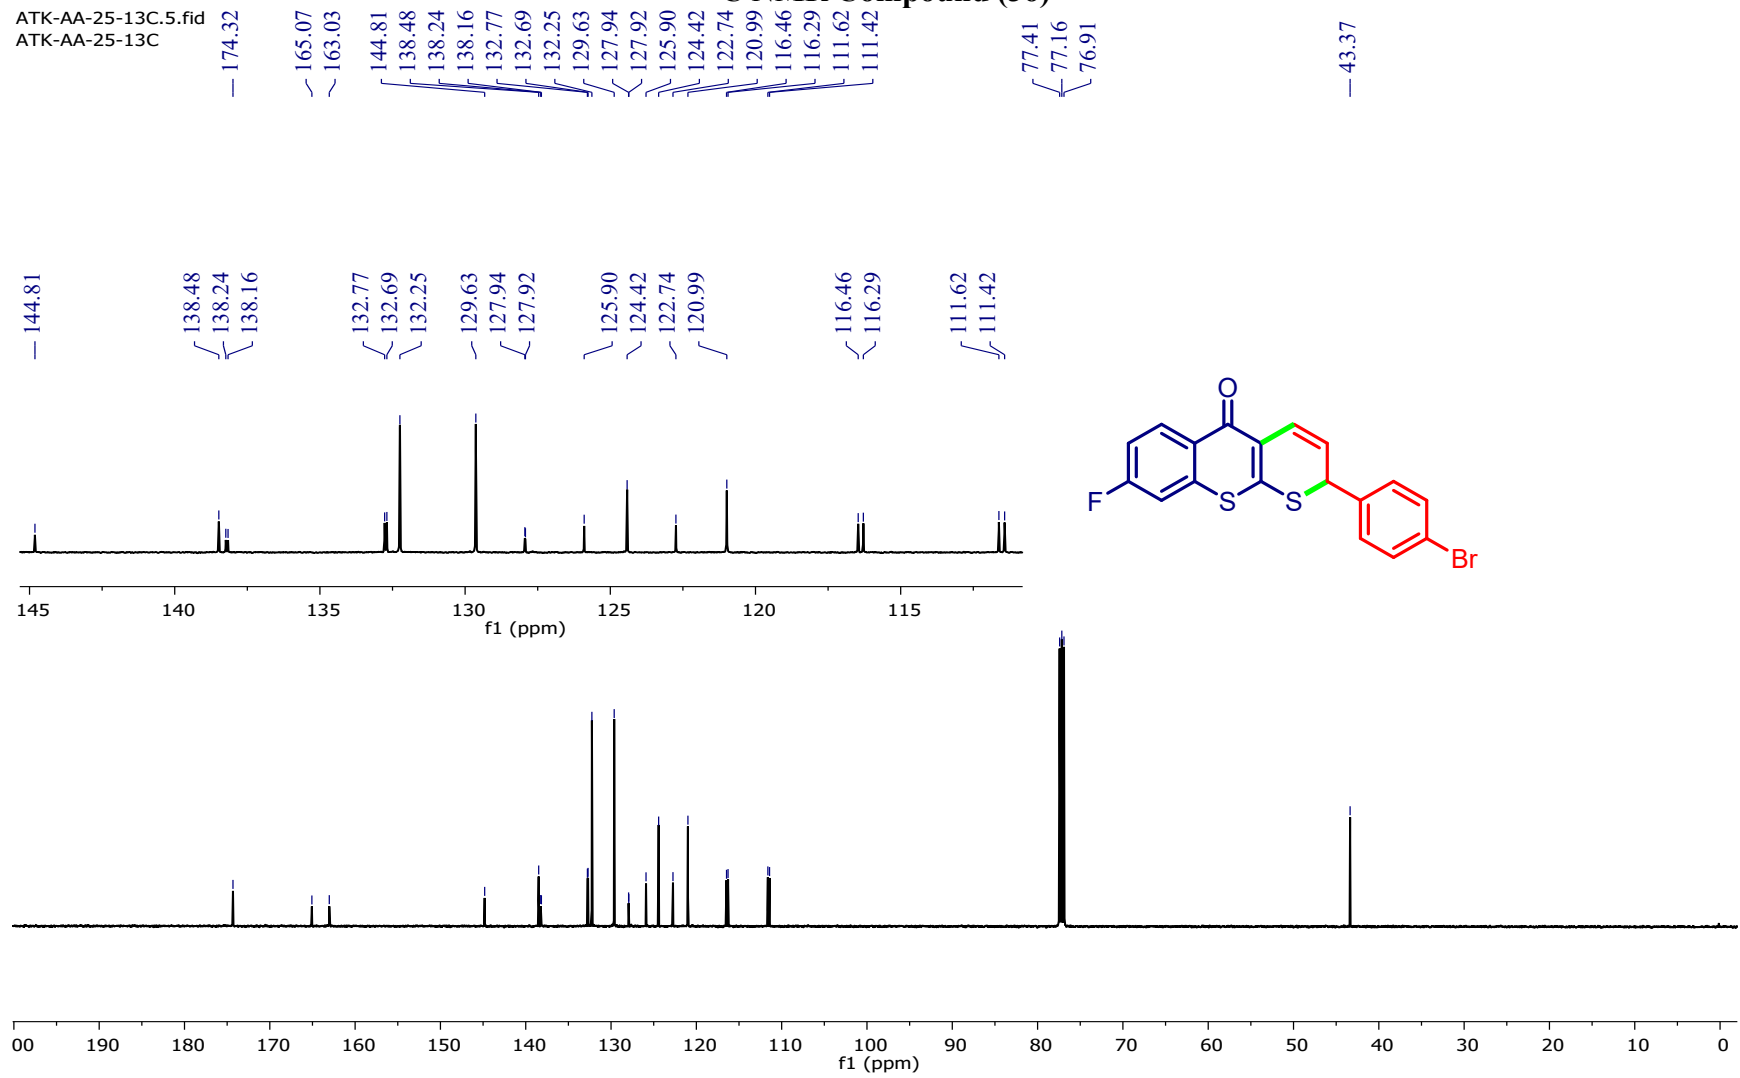

### HRMS 3o

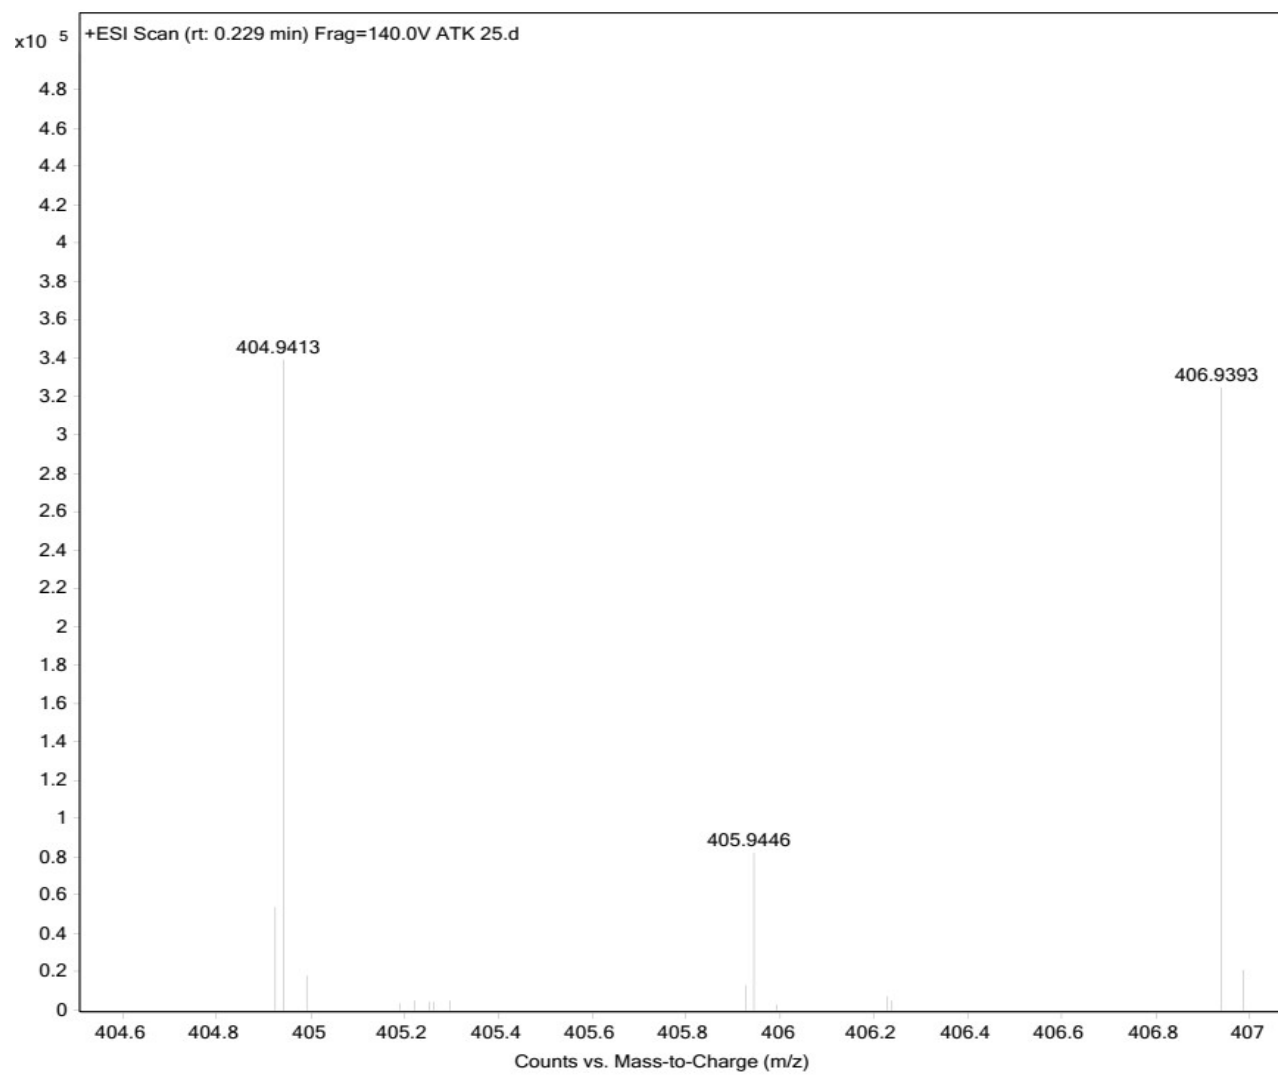

**$^1\text{H}$  NMR Compound (3p)**

ATK-AA-14-PA14-H 7.57  
ATK-AA-14-PA14-H 7.57  
ATK-AA-14-PA14-H 7.56  
ATK-AA-14-PA14-H 7.55  
ATK-AA-14-PA14-H 7.54  
ATK-AA-14-PA14-H 7.54  
ATK-AA-14-PA14-H 7.52  
ATK-AA-14-PA14-H 7.52  
ATK-AA-14-PA14-H 7.50  
ATK-AA-14-PA14-H 7.50  
ATK-AA-14-PA14-H 7.49  
ATK-AA-14-PA14-H 7.49  
ATK-AA-14-PA14-H 7.46  
ATK-AA-14-PA14-H 7.45  
ATK-AA-14-PA14-H 7.45  
ATK-AA-14-PA14-H 7.44  
ATK-AA-14-PA14-H 7.43  
ATK-AA-14-PA14-H 7.43  
ATK-AA-14-PA14-H 7.35  
ATK-AA-14-PA14-H 7.35  
ATK-AA-14-PA14-H 7.33  
ATK-AA-14-PA14-H 7.33  
ATK-AA-14-PA14-H 7.26  
ATK-AA-14-PA14-H 7.25  
ATK-AA-14-PA14-H 7.23

7.57  
7.57  
7.56  
7.55  
7.54  
7.54  
7.52  
7.52  
7.50  
7.50  
7.49  
7.49  
7.46  
7.45  
7.45  
7.44  
7.43  
7.43  
7.35  
7.35  
7.33  
7.33  
7.26  
7.25  
7.23

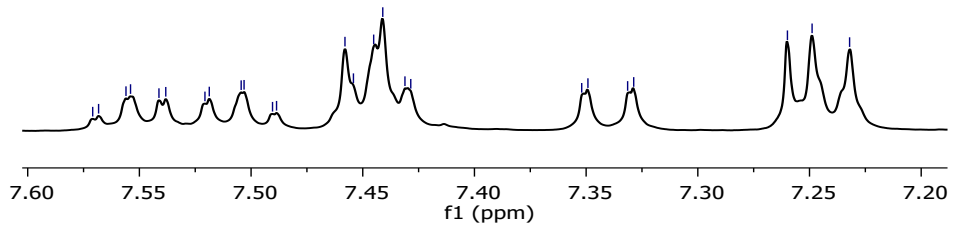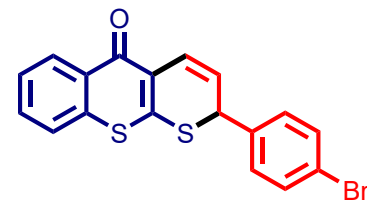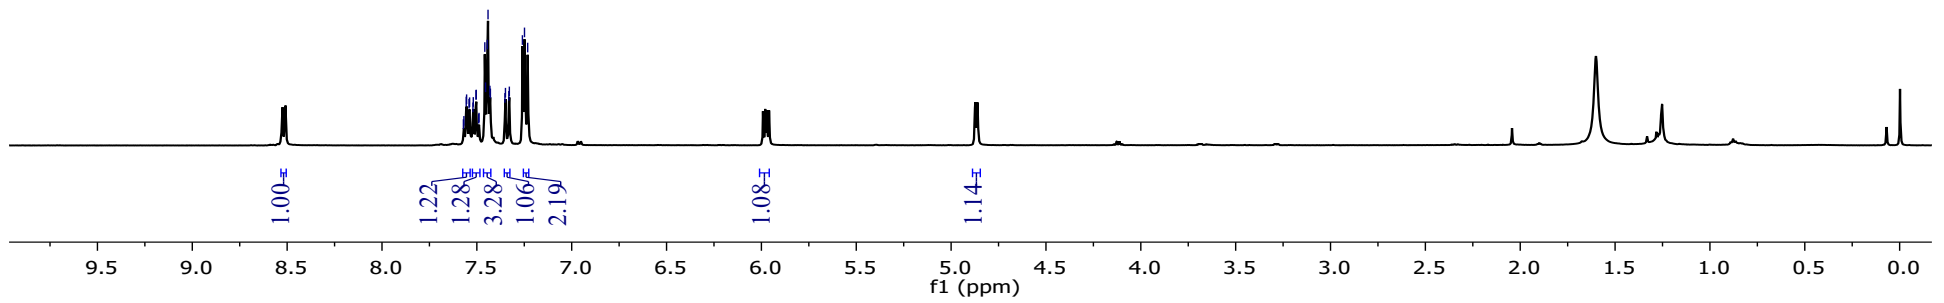



### <sup>13</sup>C NMR Compound (3p)

ATK-AA-14-13C.21.fid  
ATK-AA-14-13C

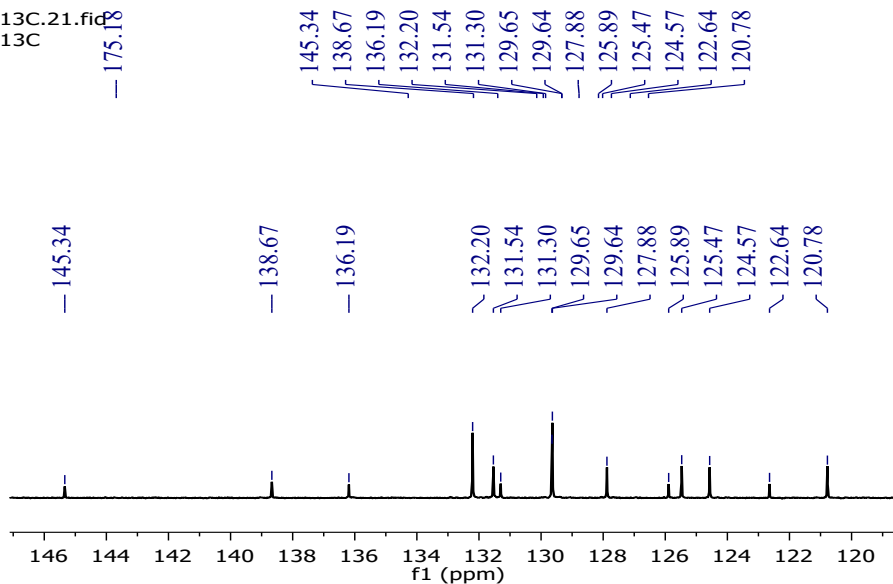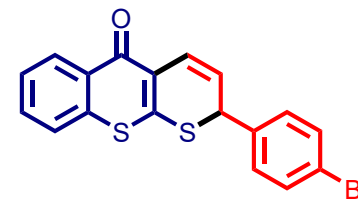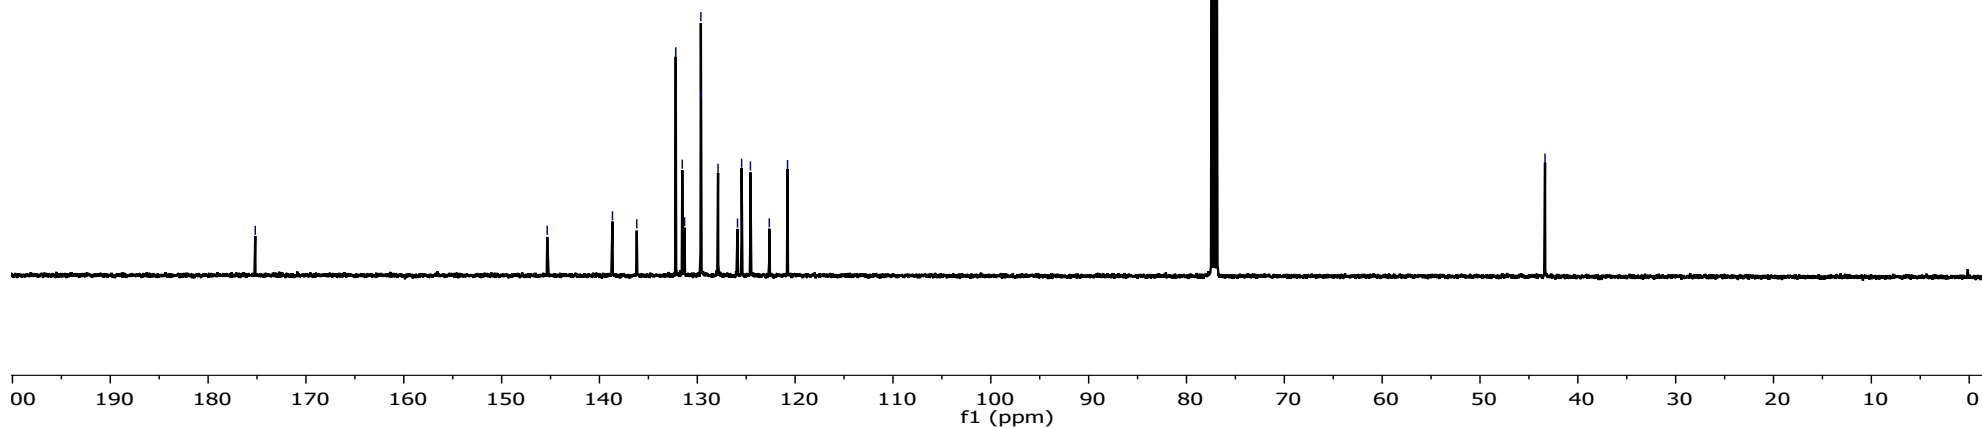

<sup>13</sup>C NMR (126 MHz, Chloroform-*d*) δ 175.1, 145.3, 138.6, 136.1, 132.2 (2C), 131.5, 131.3, 129.6, 129.6 (2C), 127.8, 125.8, 125.4, 124.5, 122.6, 120.7, 43.3.

# HRMS 3p

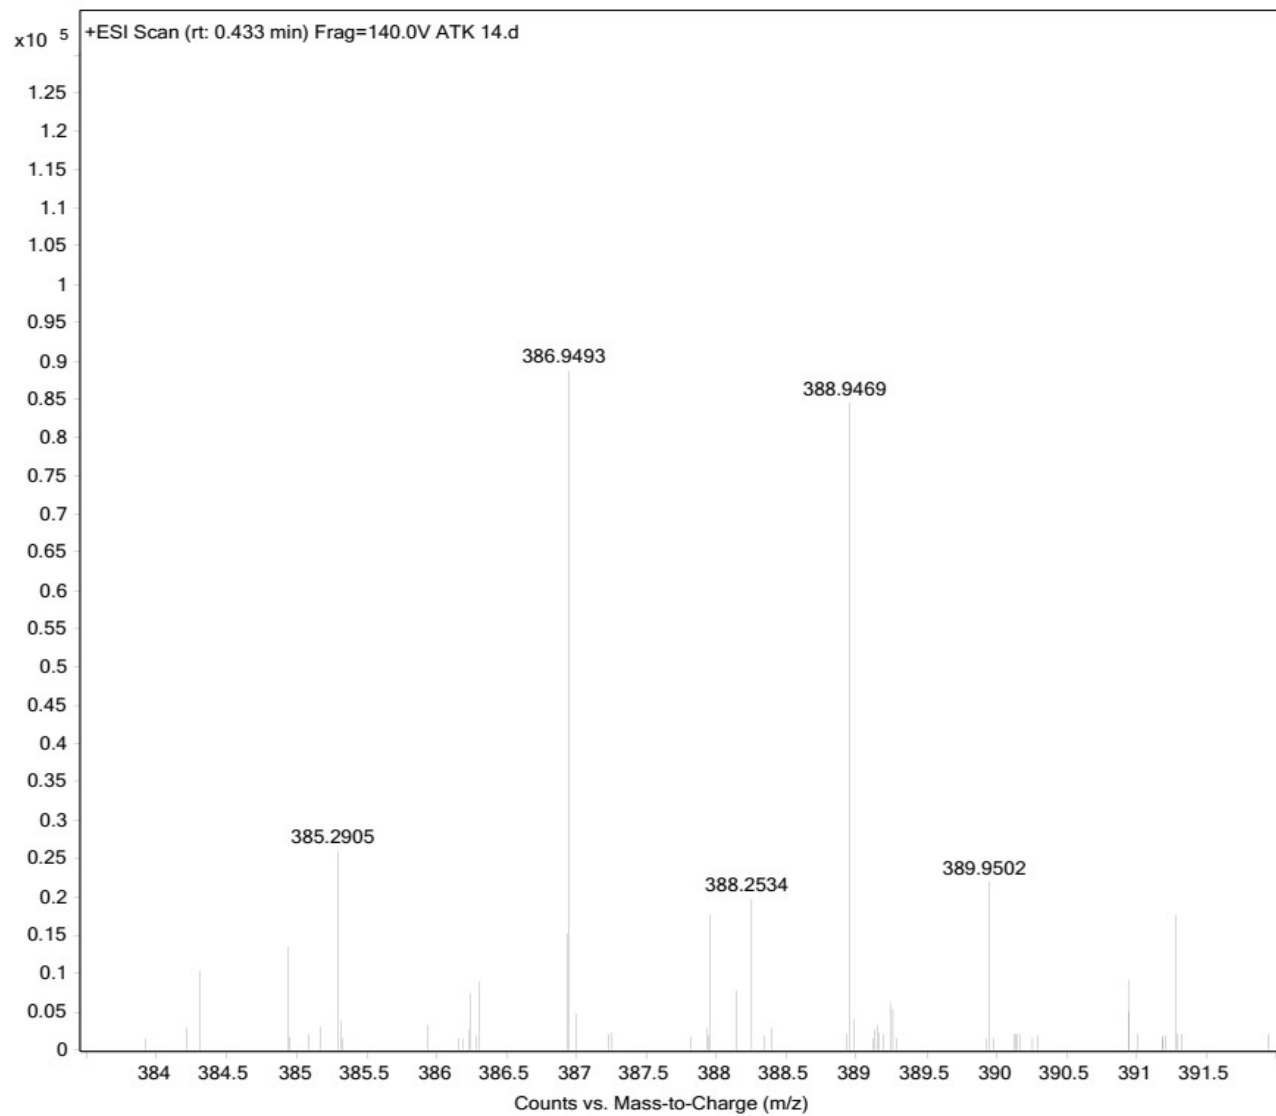

# <sup>1</sup>H NMR Compound (3q)

ATK-AA-19-4BR-1H  
ATK-AA-19-4BR-1H

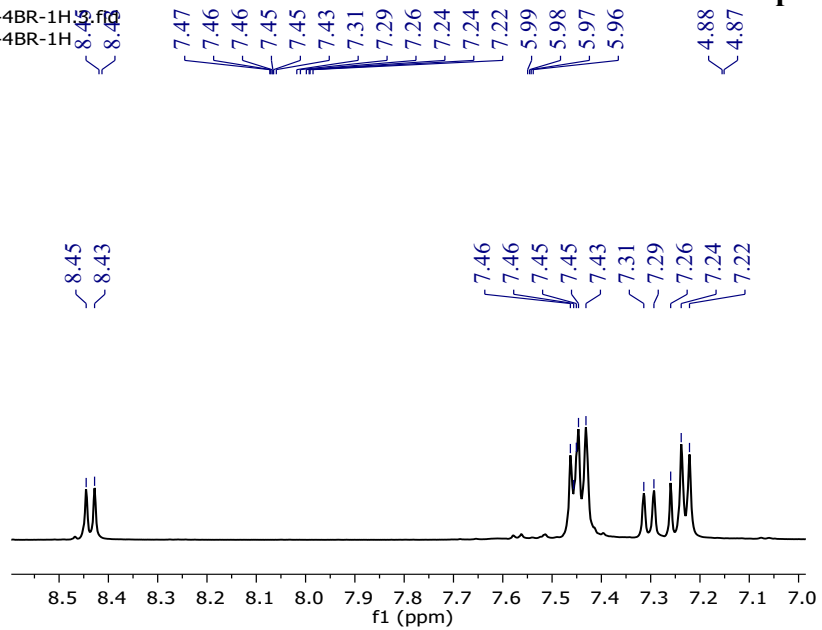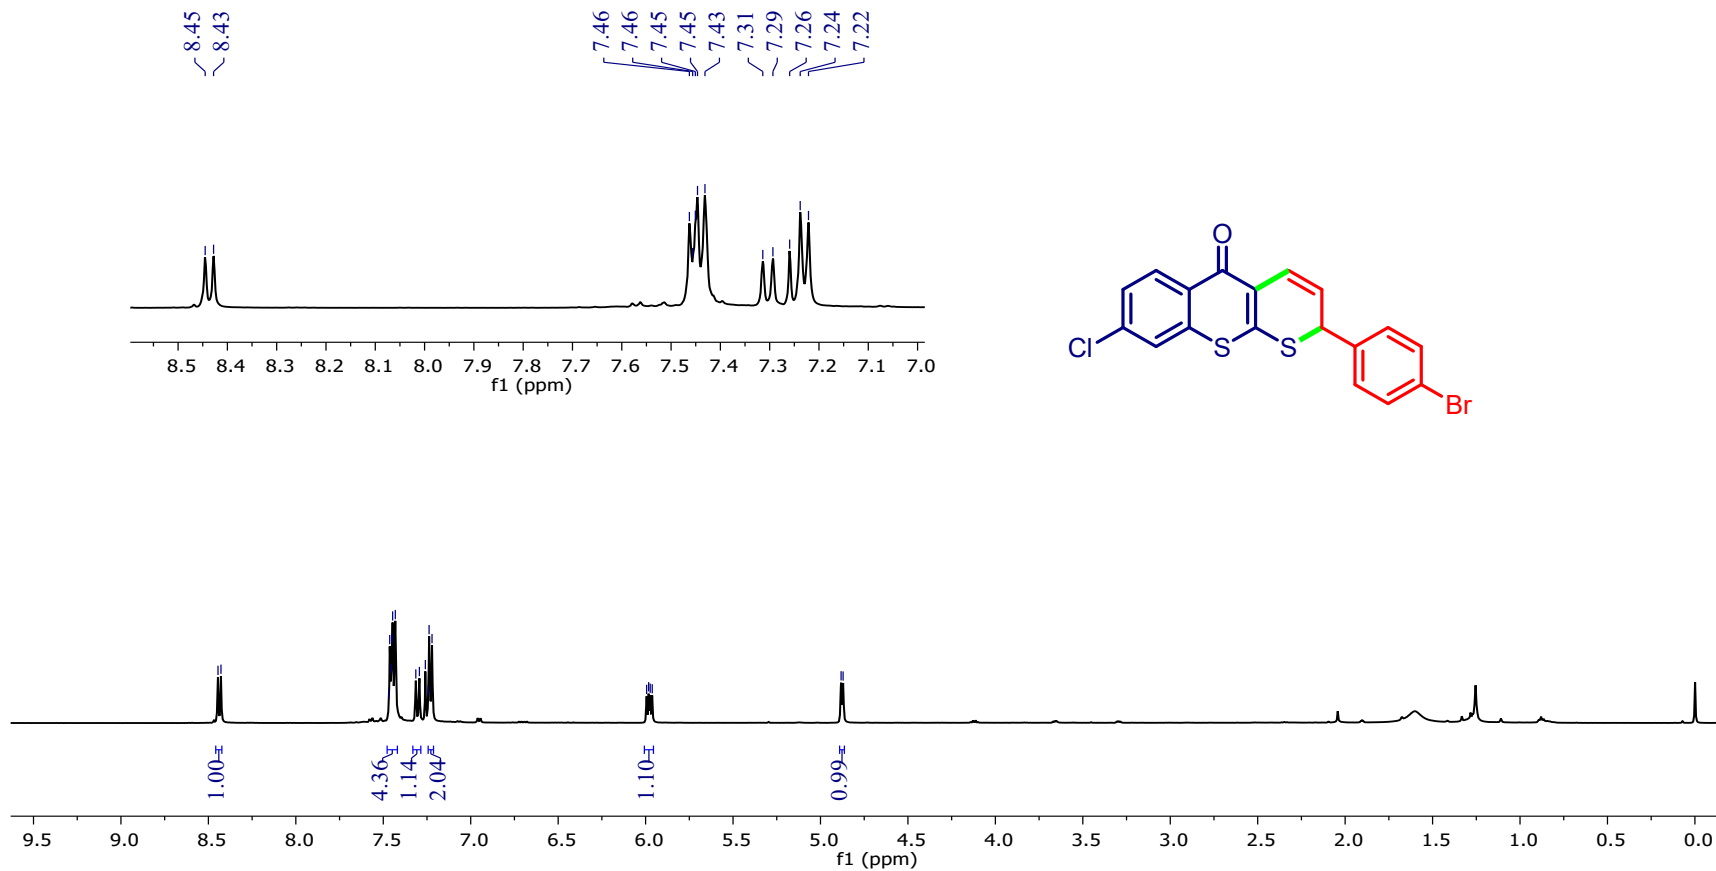

# <sup>13</sup>C NMR Compound (3q)

ATK-AA-19-4BR-13C.1.fid  
ATK-AA-19-4BR-13C

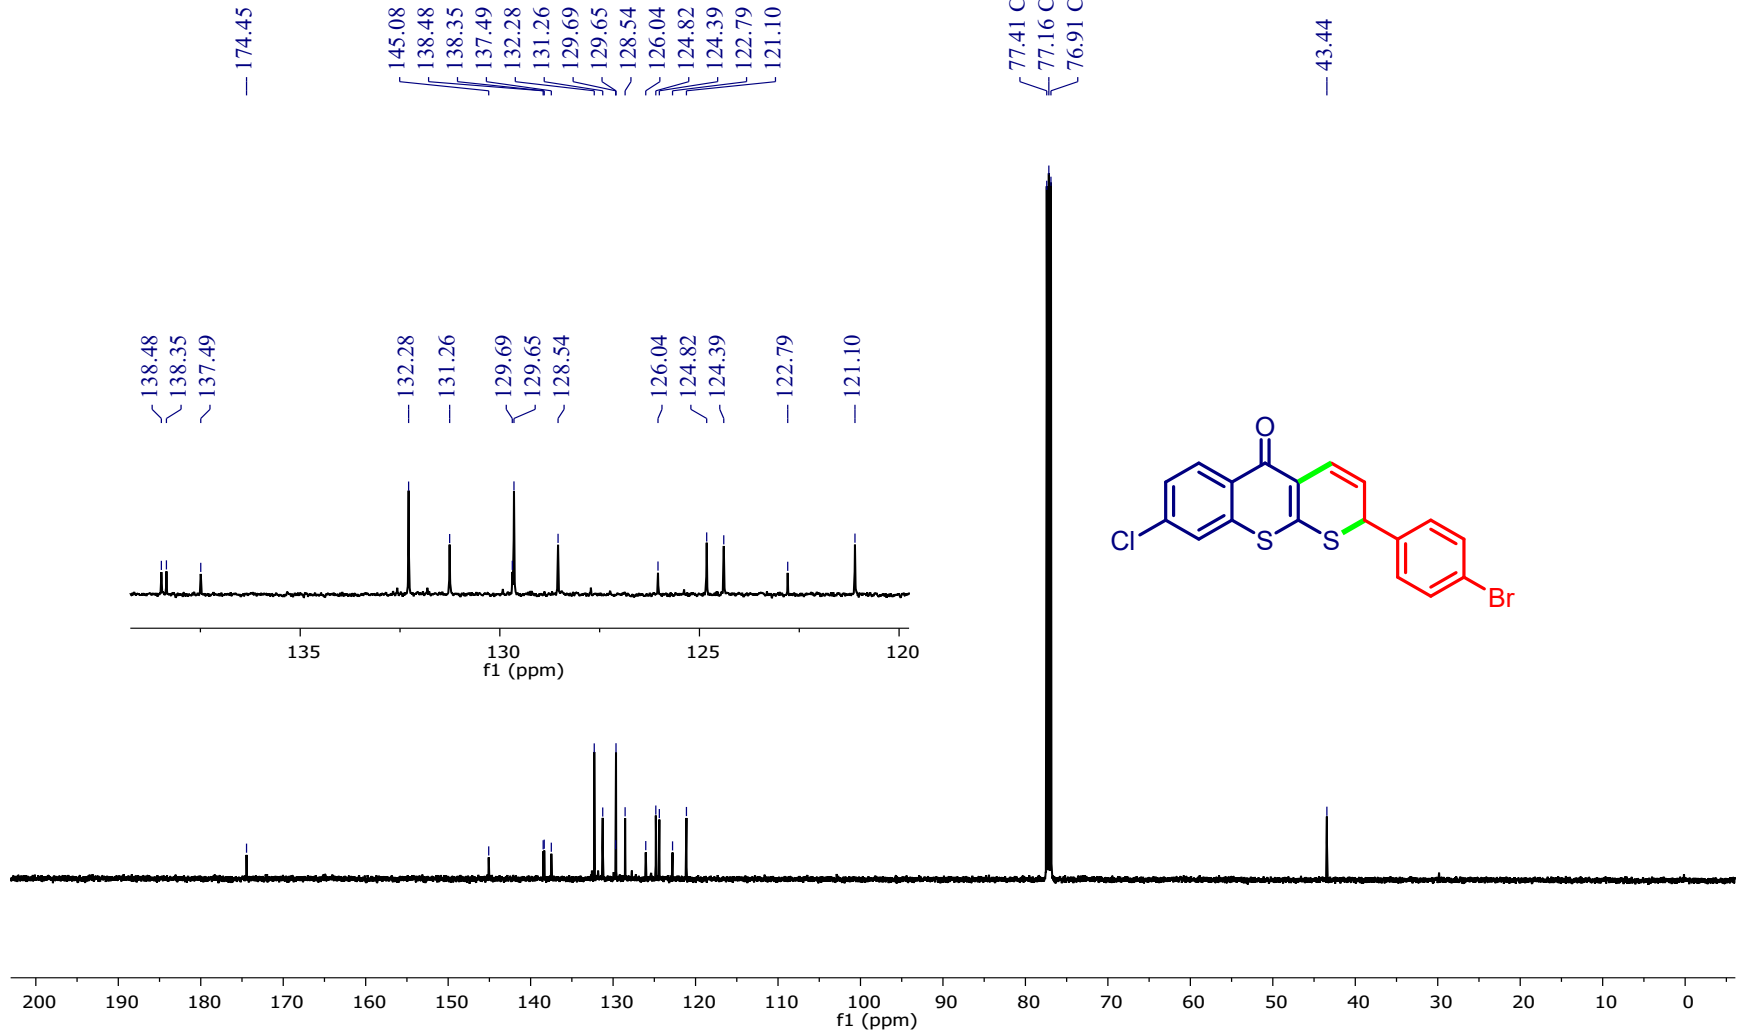

# HRMS 3q

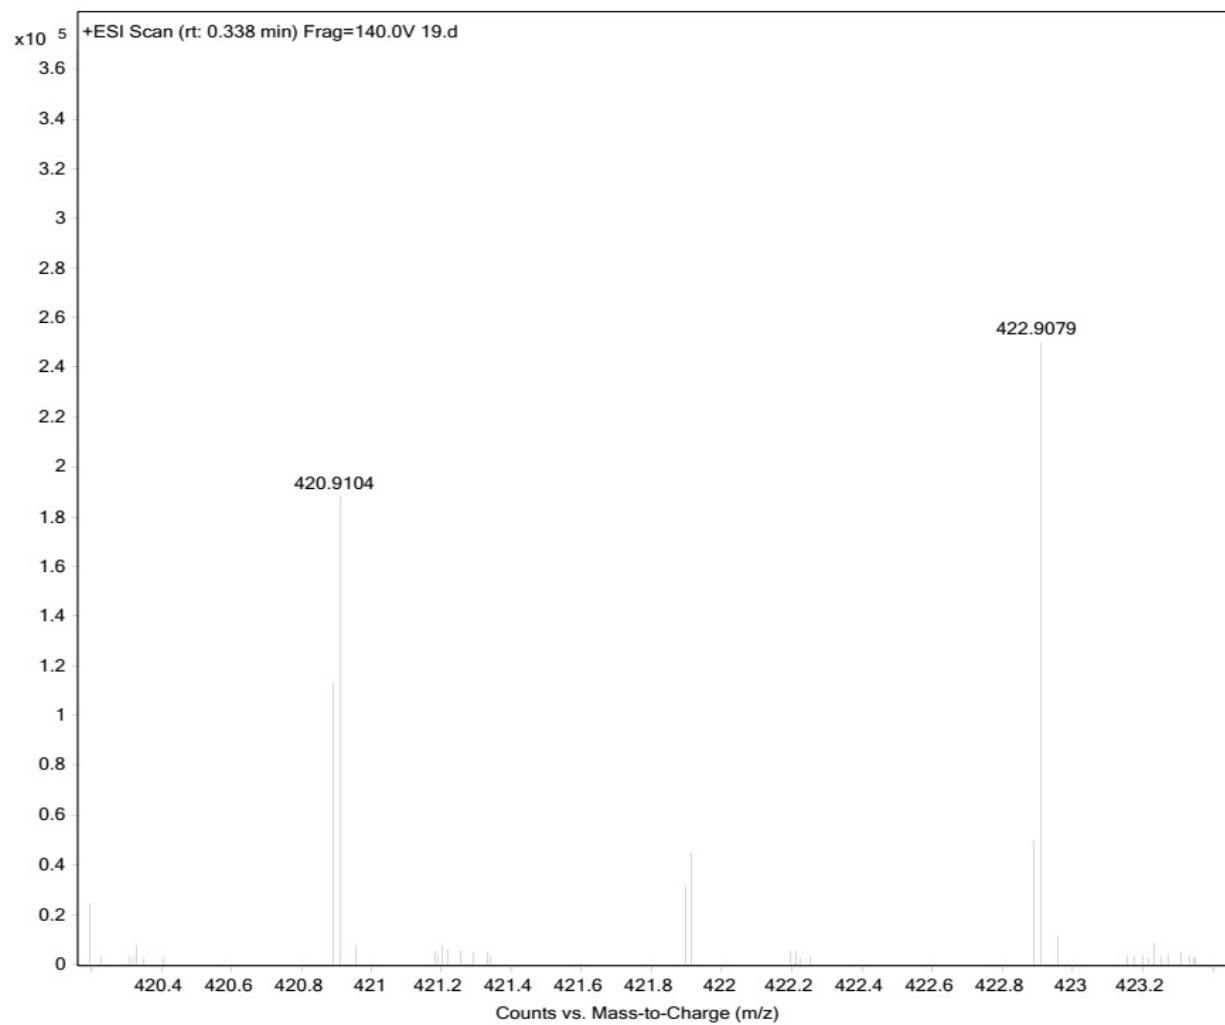

# <sup>1</sup>H NMR of compound (3r)

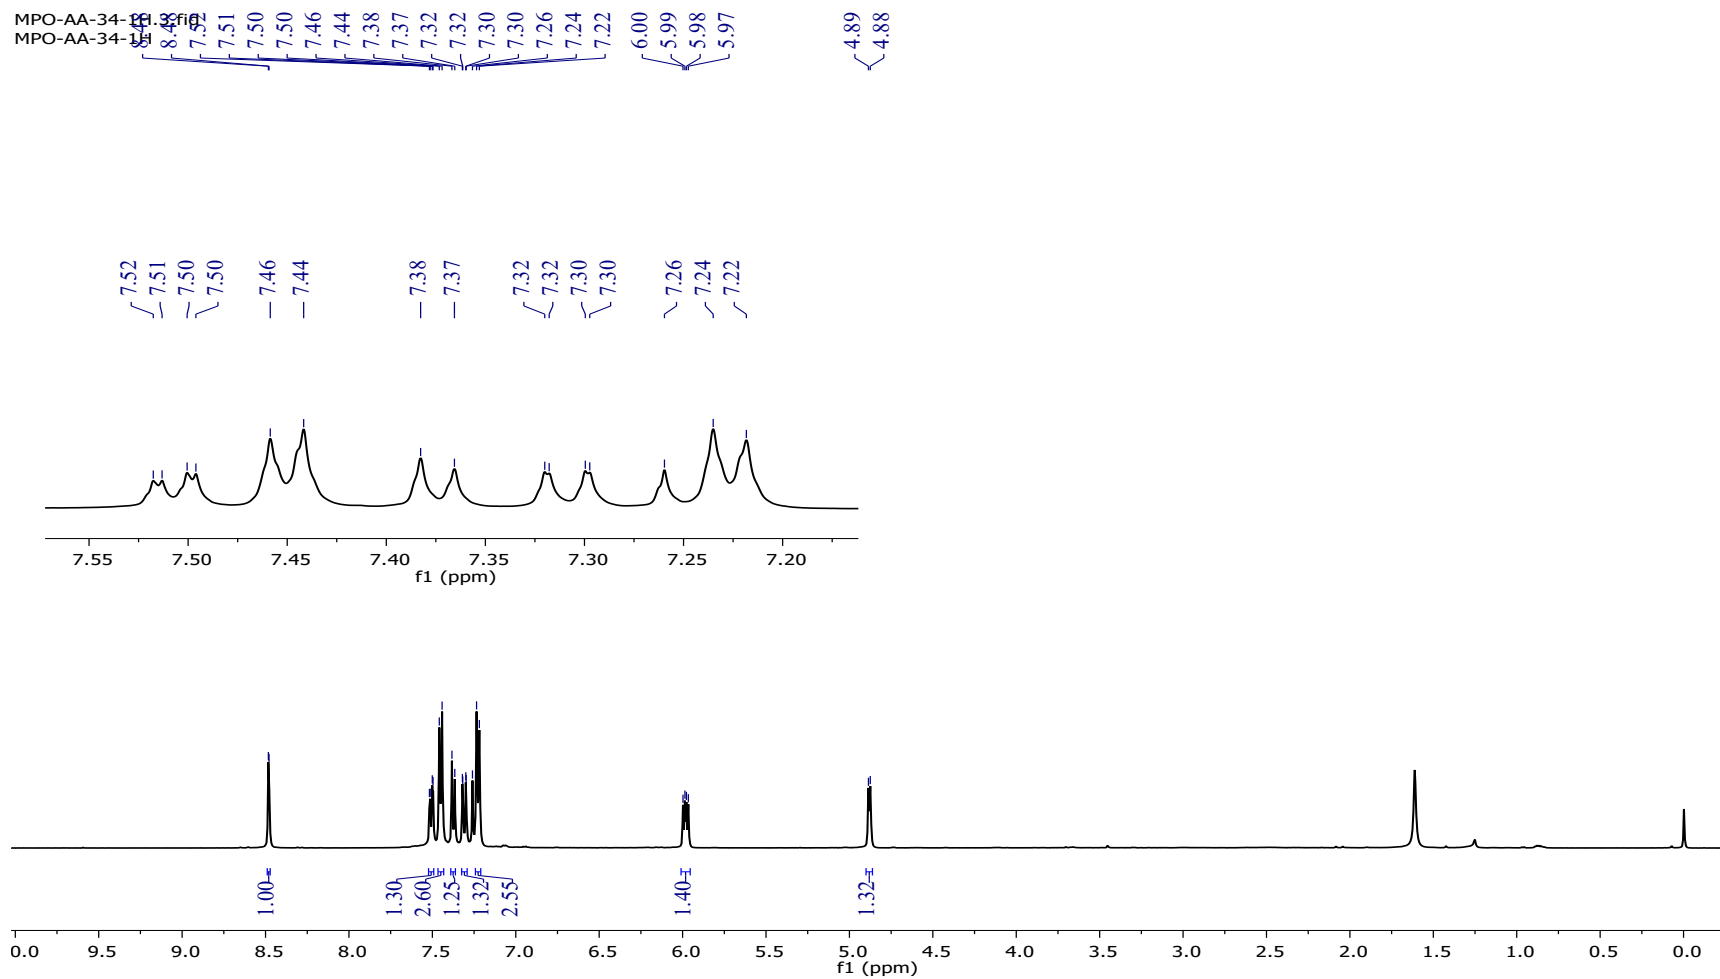

### <sup>13</sup>C NMR of compound (3r)

MPO-AA-34-13C.1.fid  
MPO-AA-34-13C

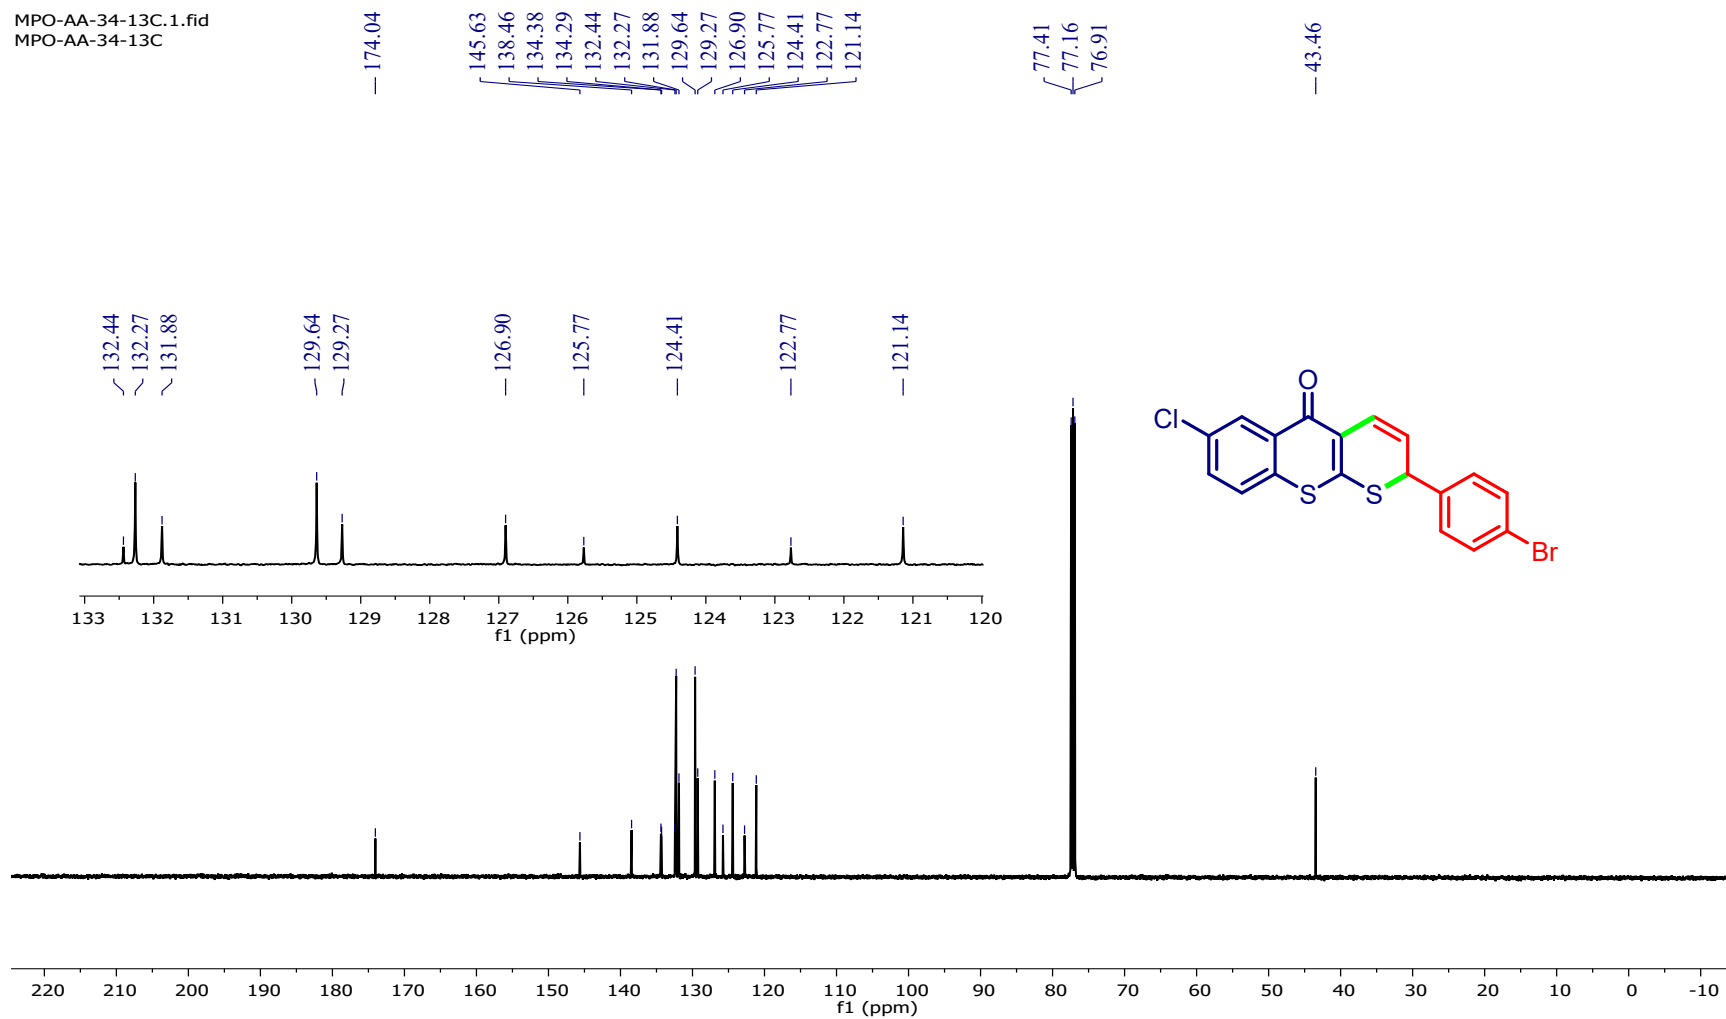

# HRMS of 3r

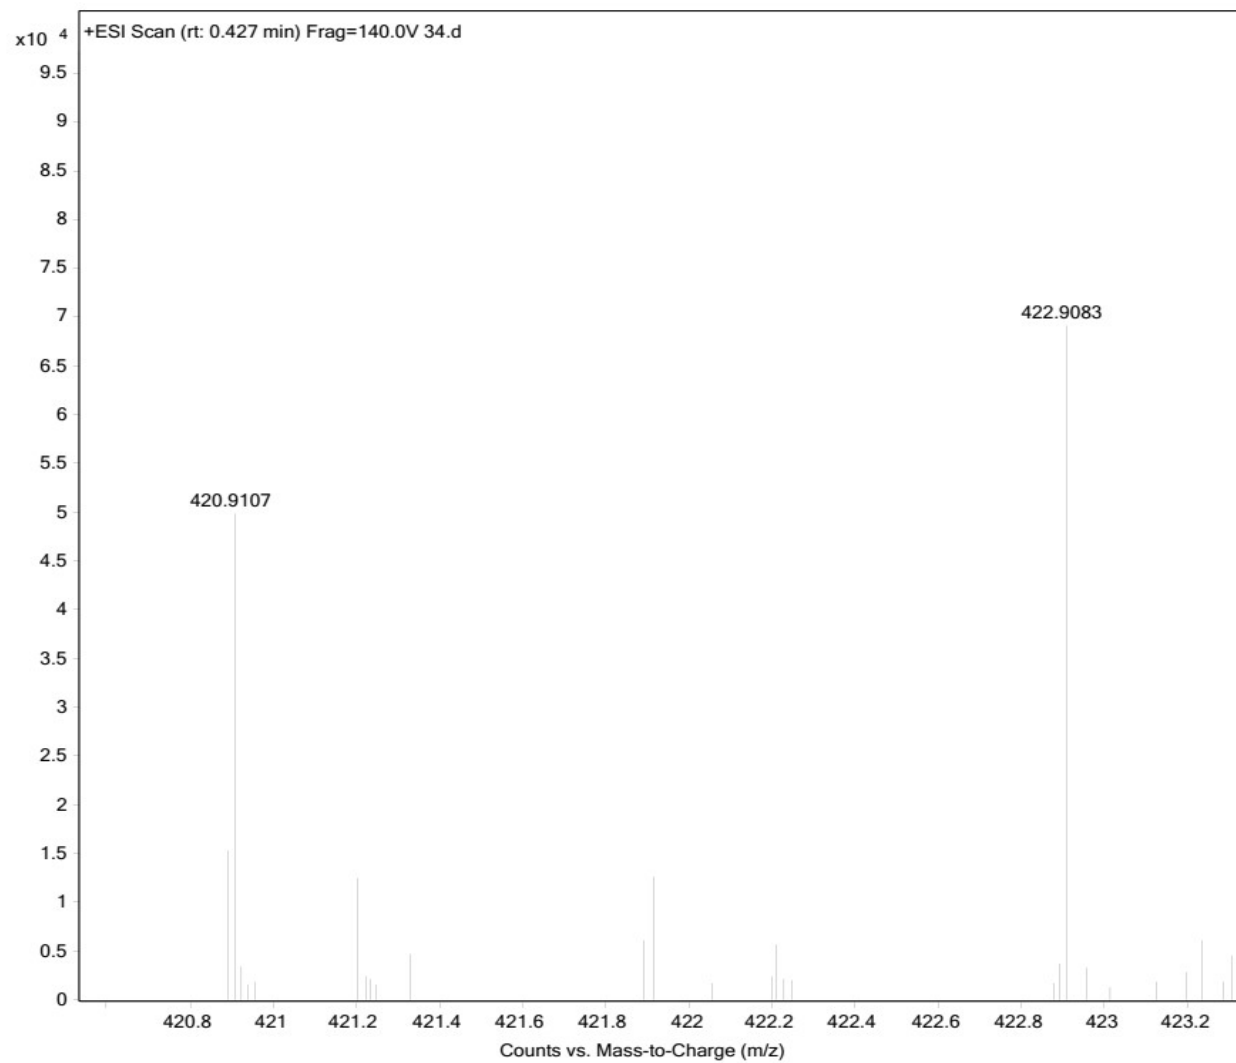



### <sup>1</sup>H NMR of compound (3s)

ATK-AA-29-1H.1.f1  
ATK-AA-29-1H

8.81  
8.81

7.77  
7.76  
7.75  
7.75  
7.57  
7.56

7.31  
7.31  
7.29  
7.29  
7.28  
7.26

6.04  
6.03  
6.02  
6.01

4.98  
4.98  
4.97  
4.97

2.35

0.48

7.77  
7.76  
7.75

7.57  
7.56

7.31  
7.31  
7.29  
7.29  
7.28  
7.26

7.17  
7.15

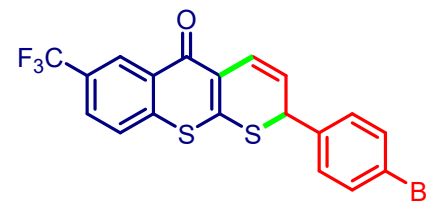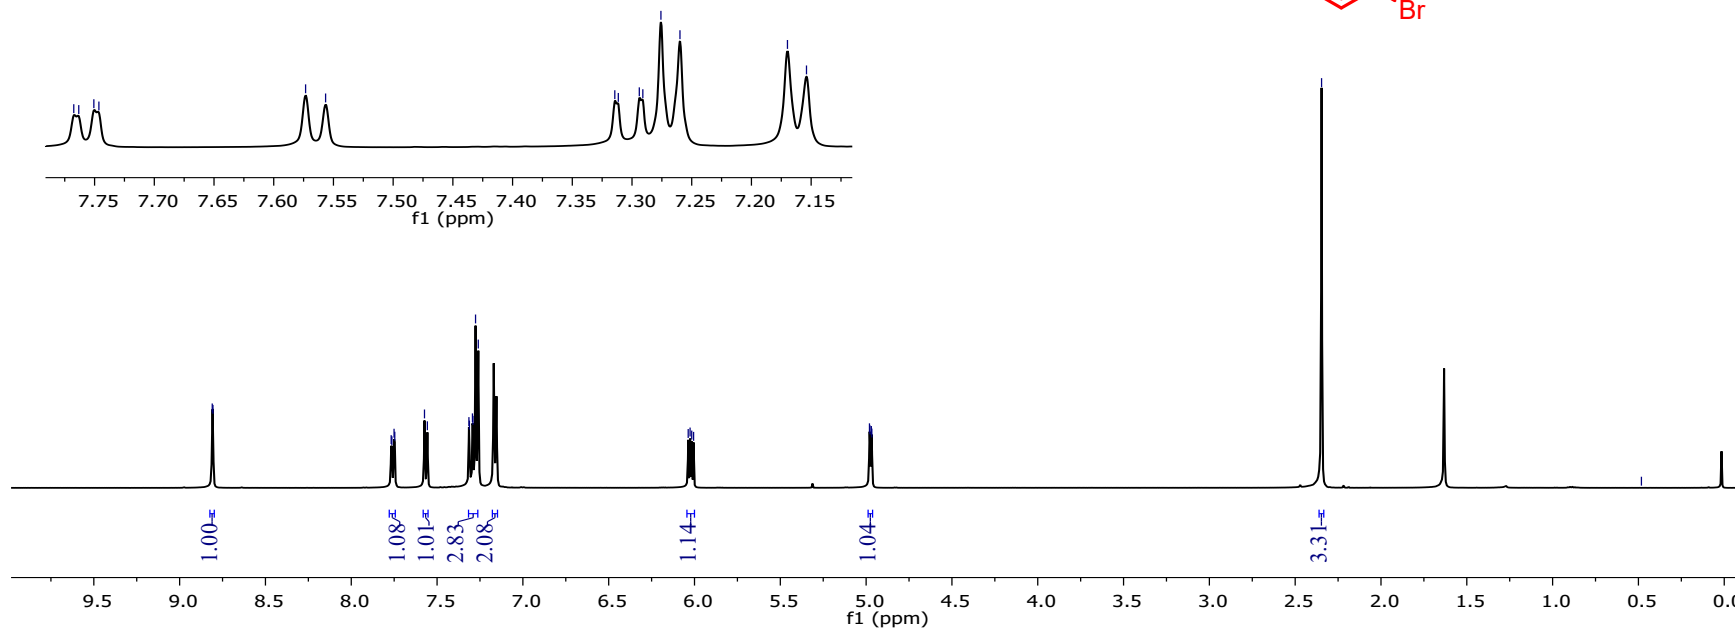

# <sup>13</sup>C NMR of compound (3s)

ATK-AA-29-13C.5.fid  
ATK-AA-29-13C

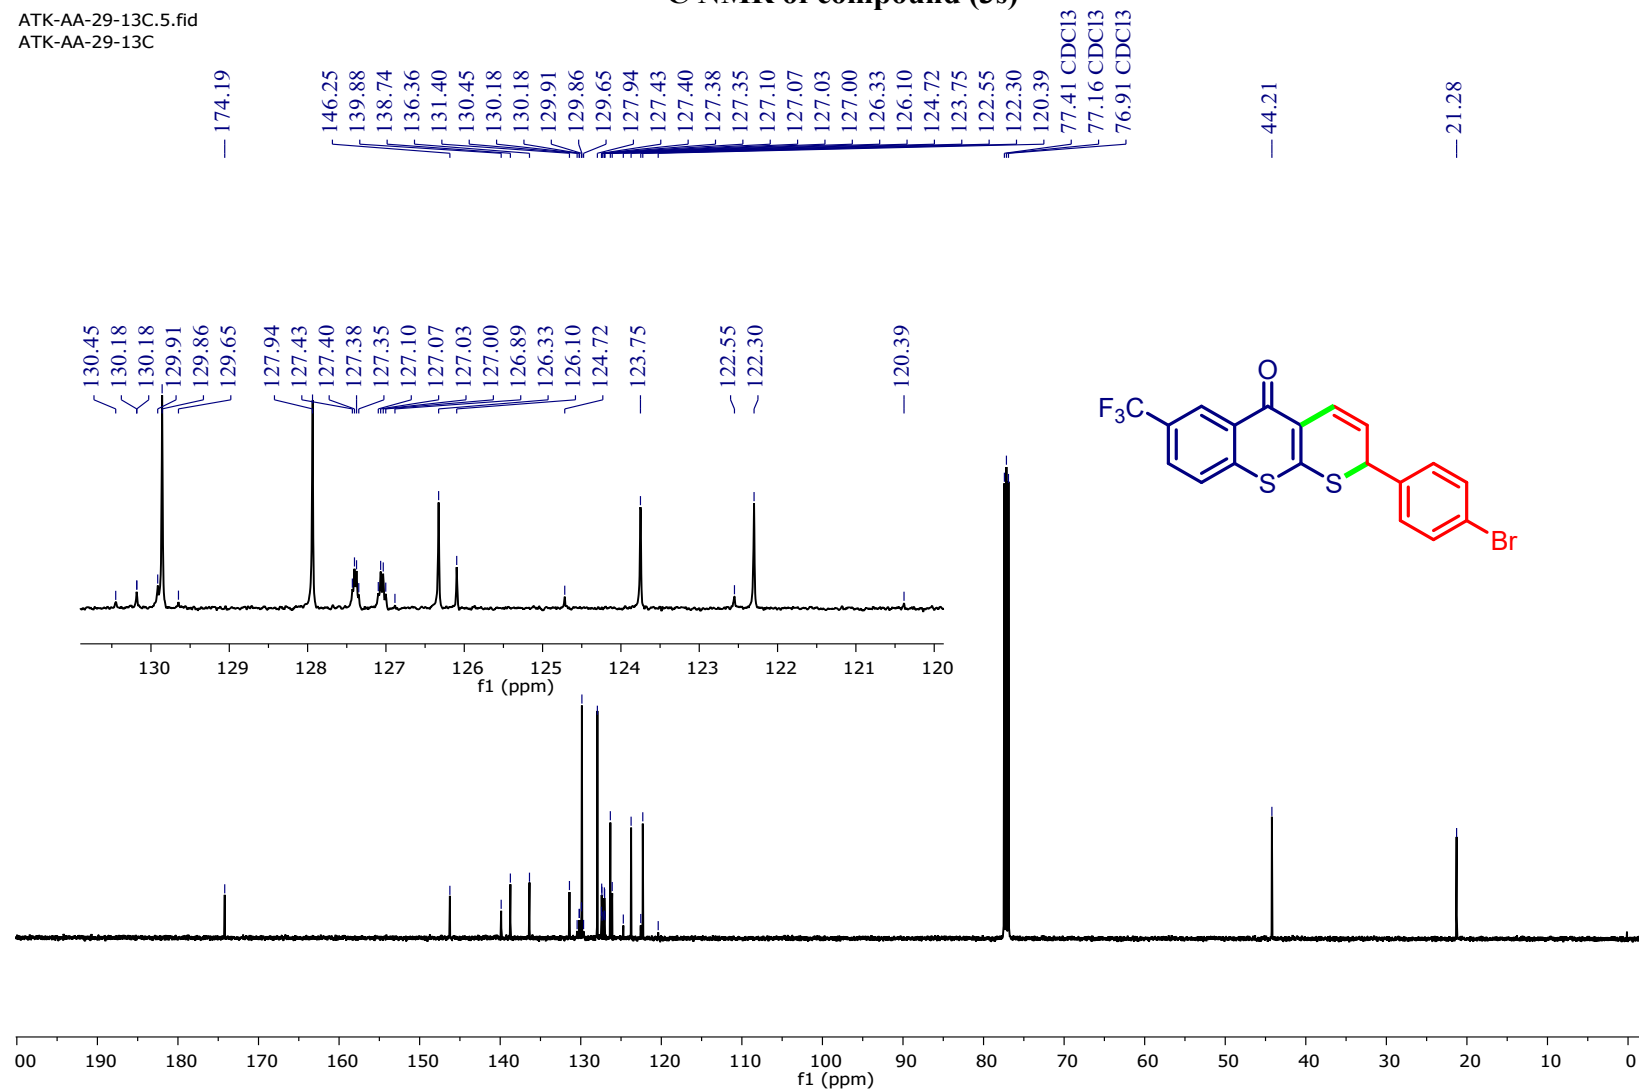

# HRMS a(3s)

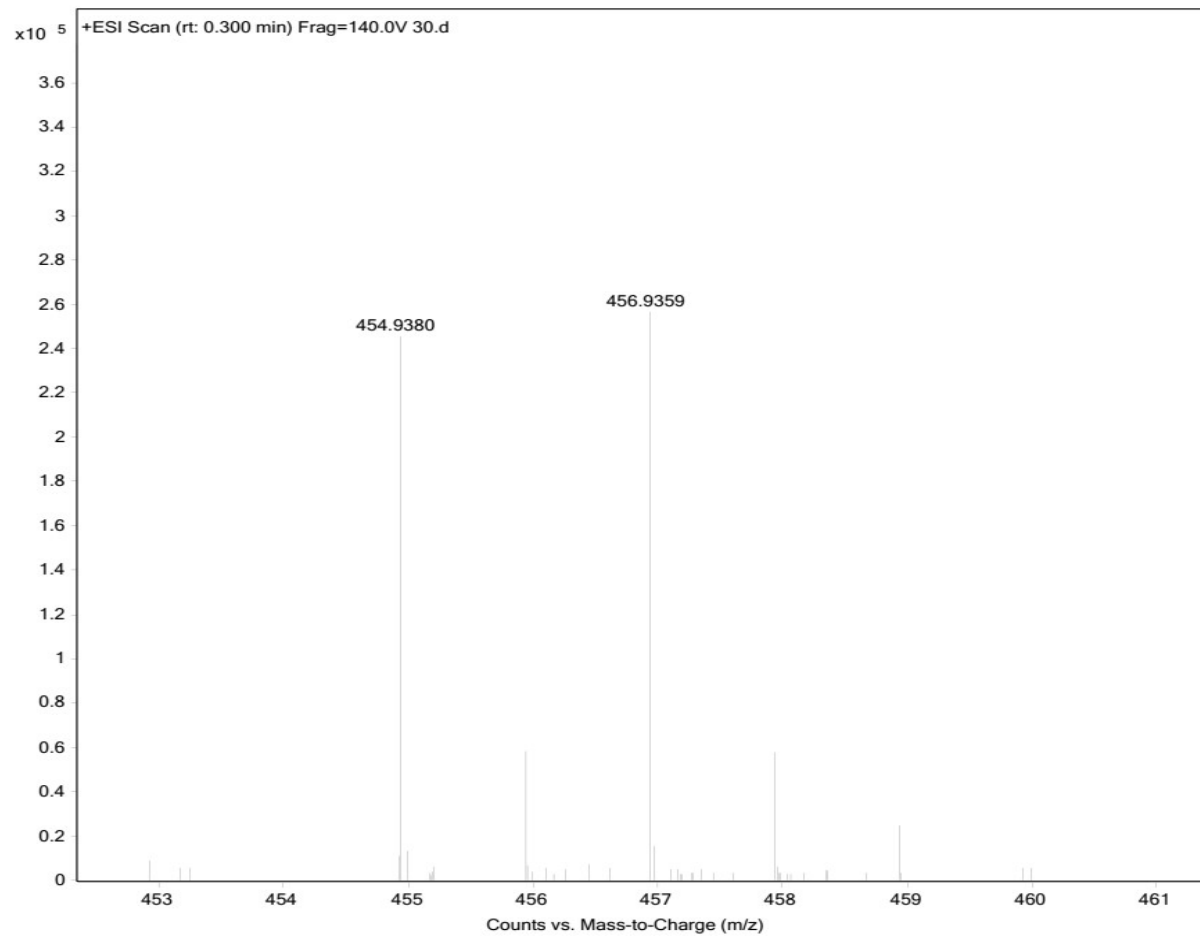

ATK-AA-35-1H.1.fid  
ATK-AA-35-1H

### <sup>1</sup>H NMR Compound (3t)

7.46  
7.45  
7.43  
7.32  
7.31  
7.29  
7.27  
7.26  
7.10  
7.09

4.49

1.98

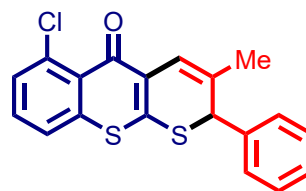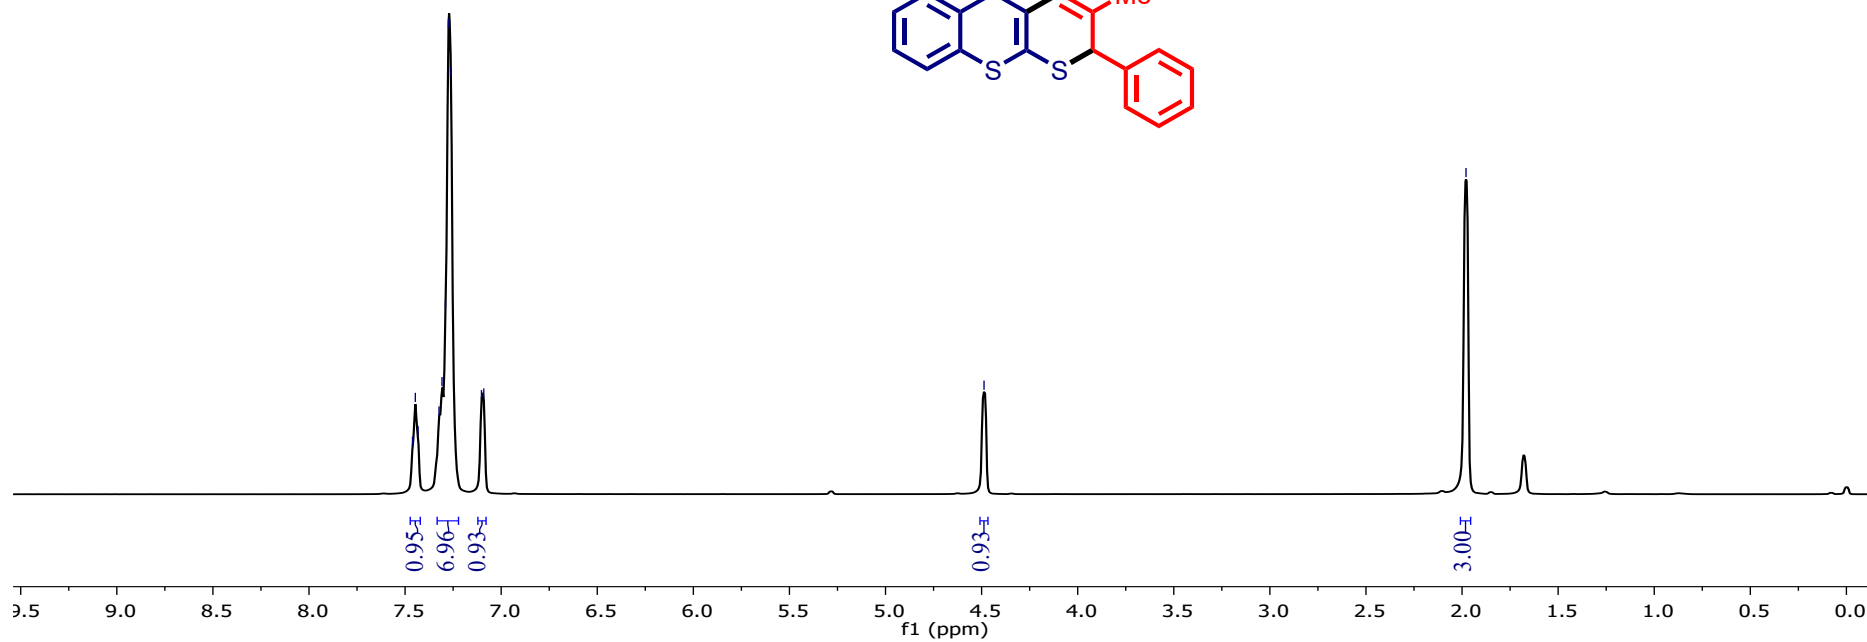

ATK-AA-35-13C.3.fid  
ATK-AA-35-13C

### <sup>13</sup>C NMR Compound (3t)

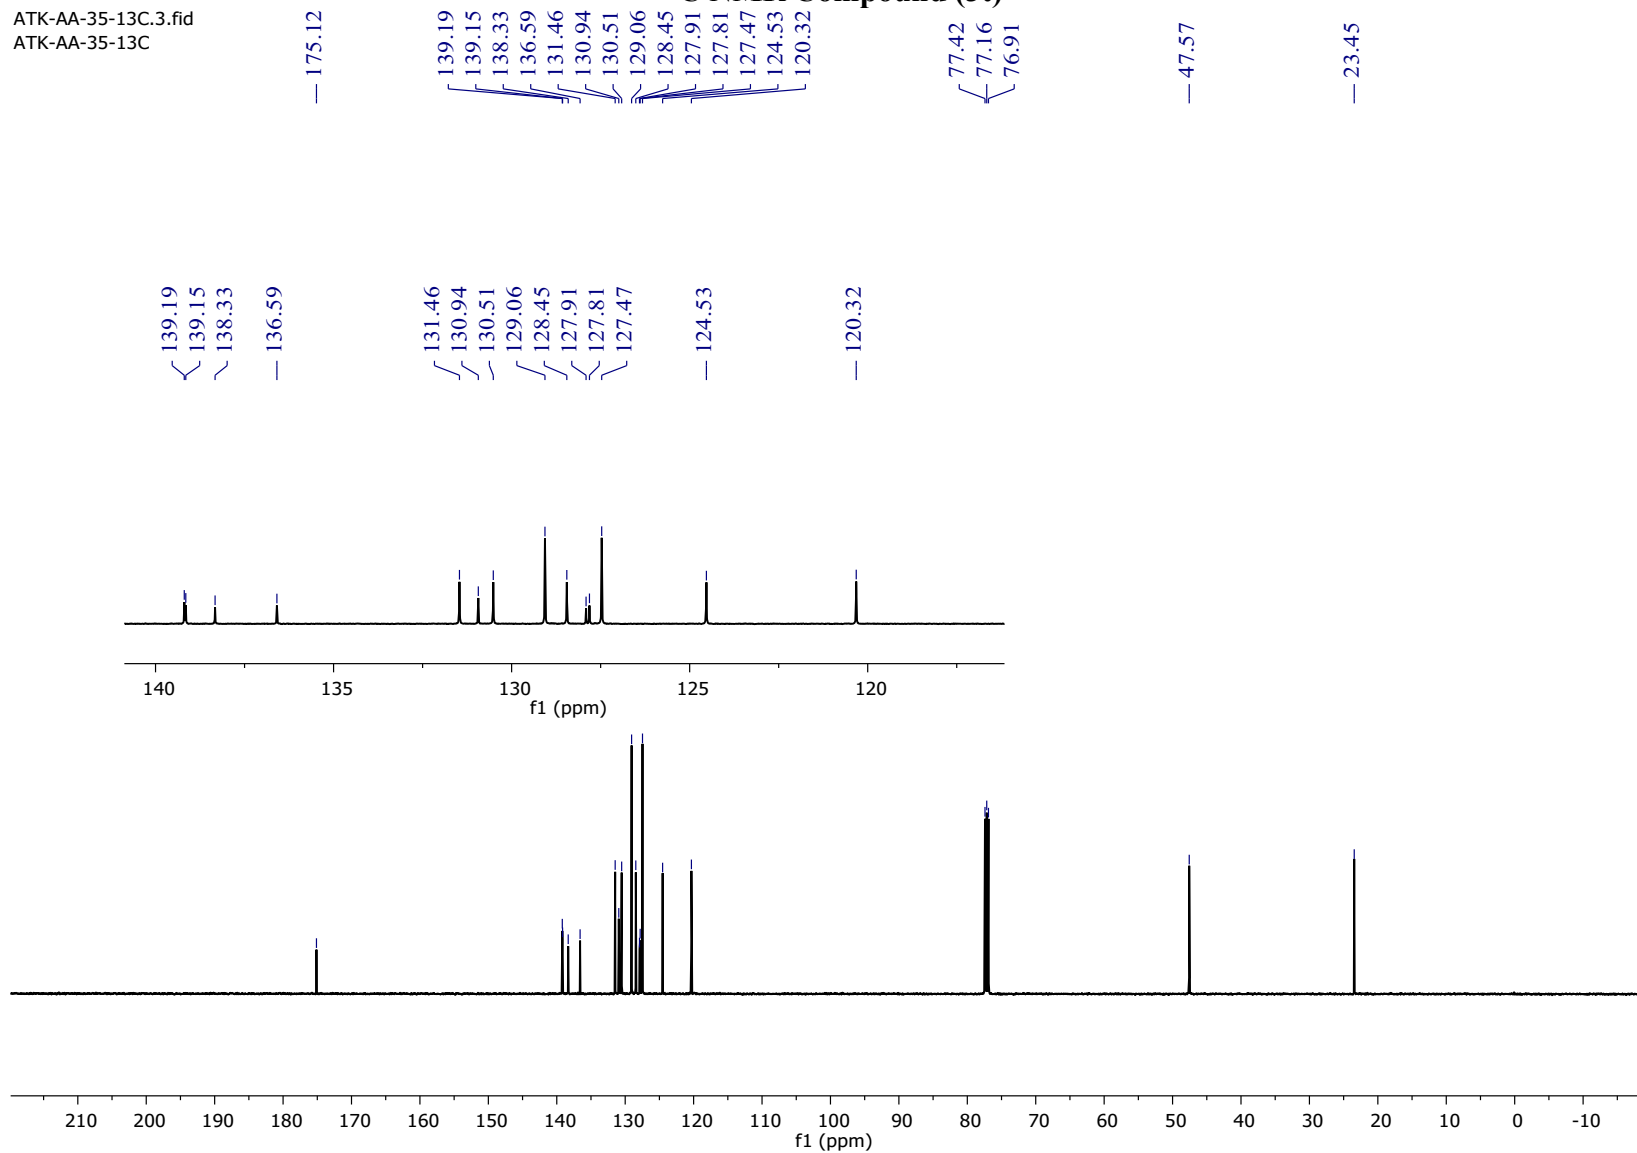

# HRMS (3t)

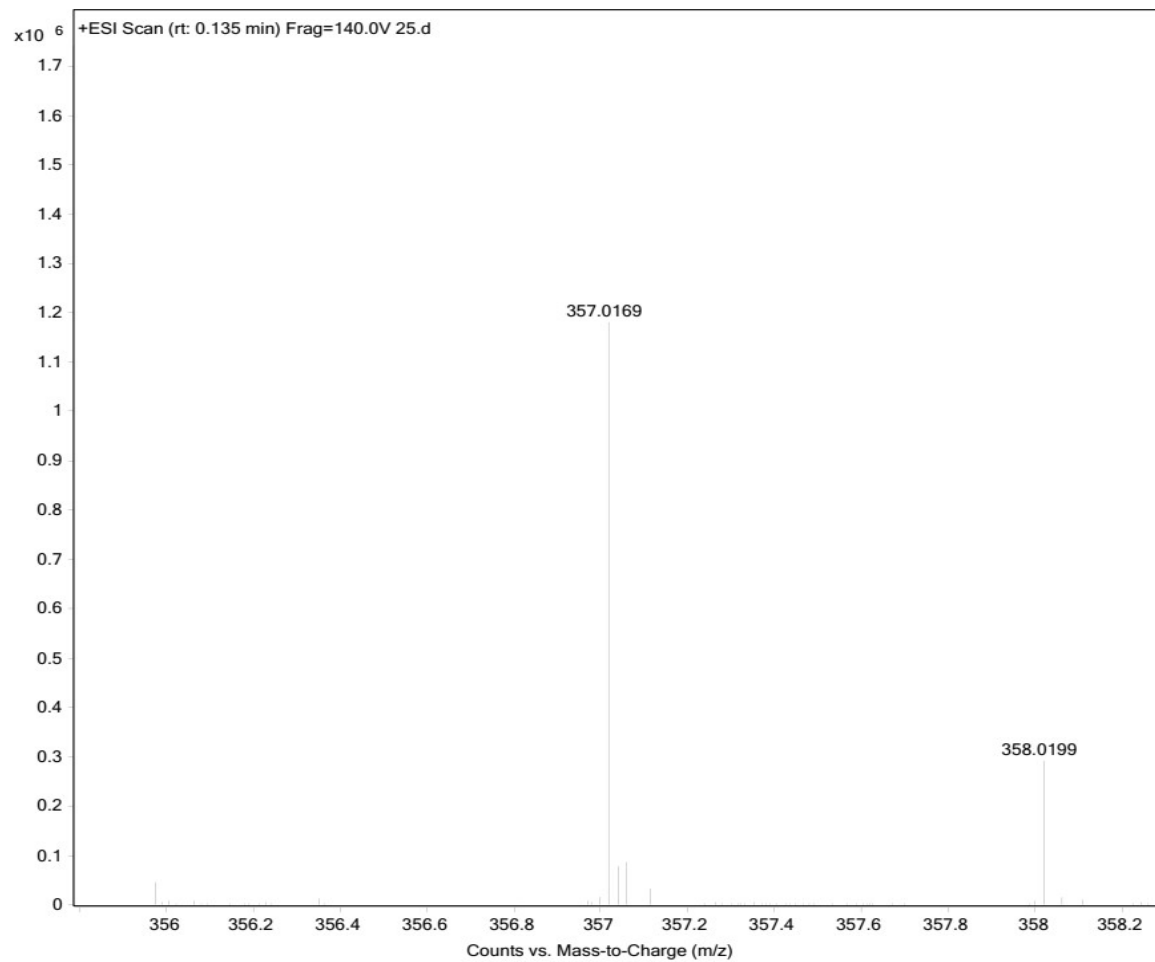

# <sup>1</sup>H NMR (3u)

ATK-AA-28-1H.1  
ATK-AA-28-1H

8.45  
8.44  
7.44  
7.43  
7.41  
7.41  
7.29  
7.28  
7.27  
7.26  
7.19  
7.19

4.52

2.01

7.44  
7.43  
7.41  
7.41

7.29  
7.28  
7.27  
7.26

7.19  
7.19

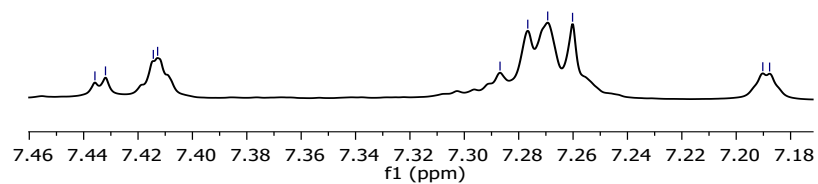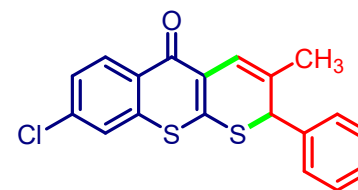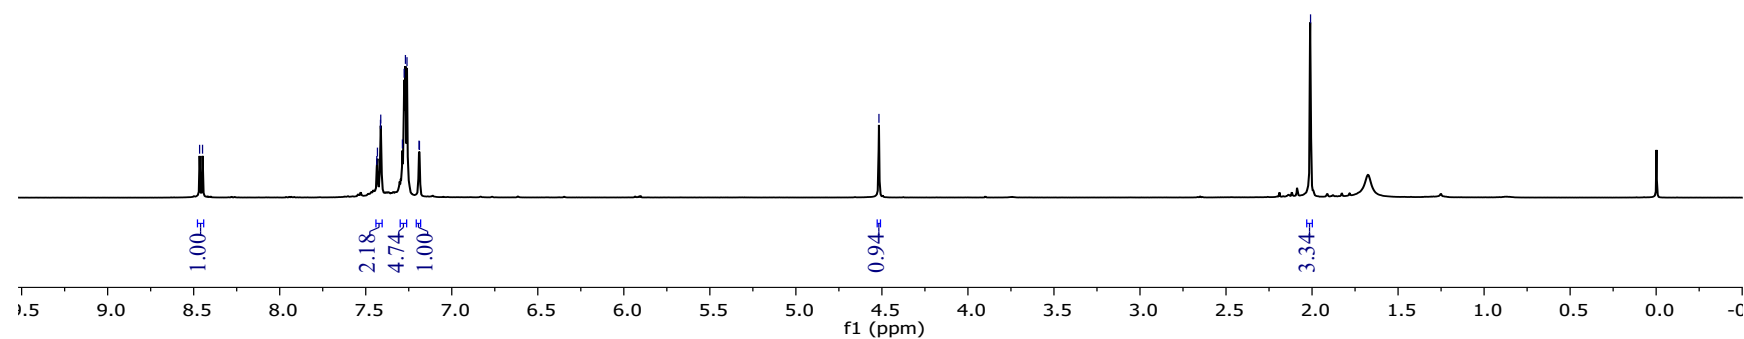

### <sup>13</sup>C NMR of compound (3u)

ATK-AA-28-13C.5.fid  
ATK-AA-28-13C

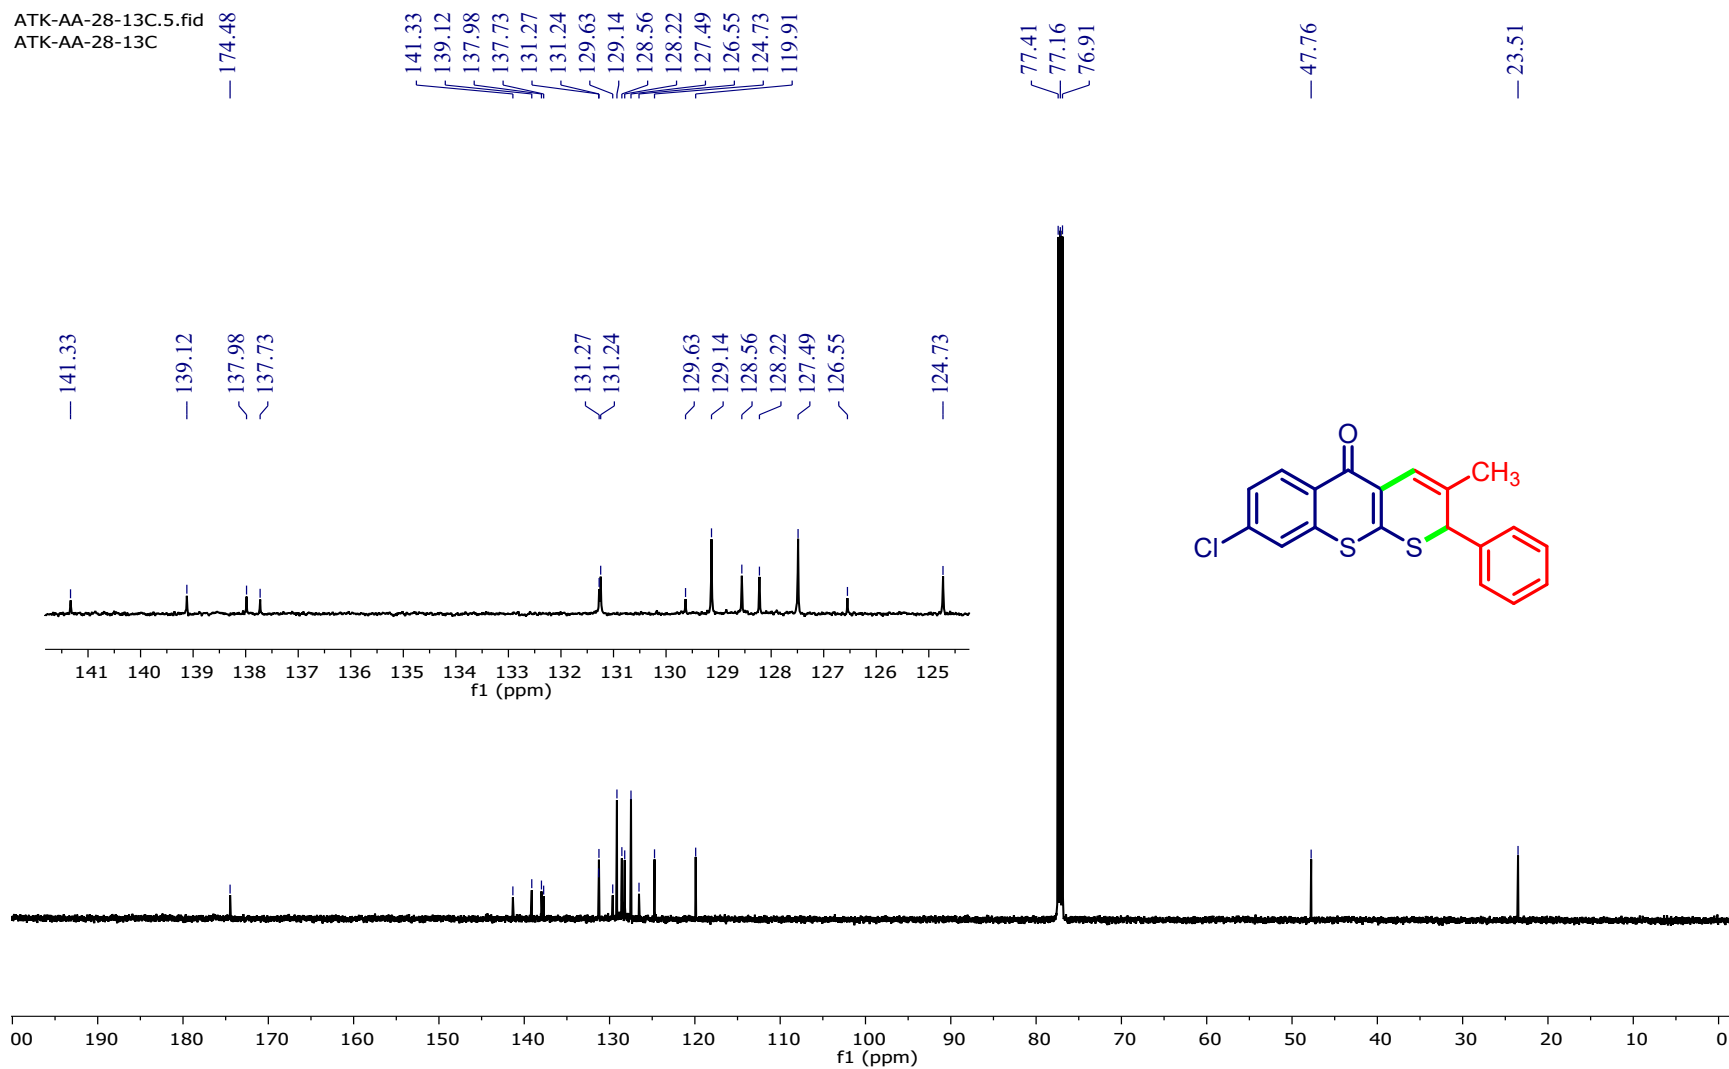

(126 MHz, Chloroform-*d*)  $\delta$  174.48, 141.33, 139.12, 137.98, 137.73, 131.27, 131.24, 129.63, 129.14, 128.56, 128.22, 127.49, 126.55, 124.73, 119.91, 47.76, 23.51. <sup>13</sup>C NMR



# HRMS 3u

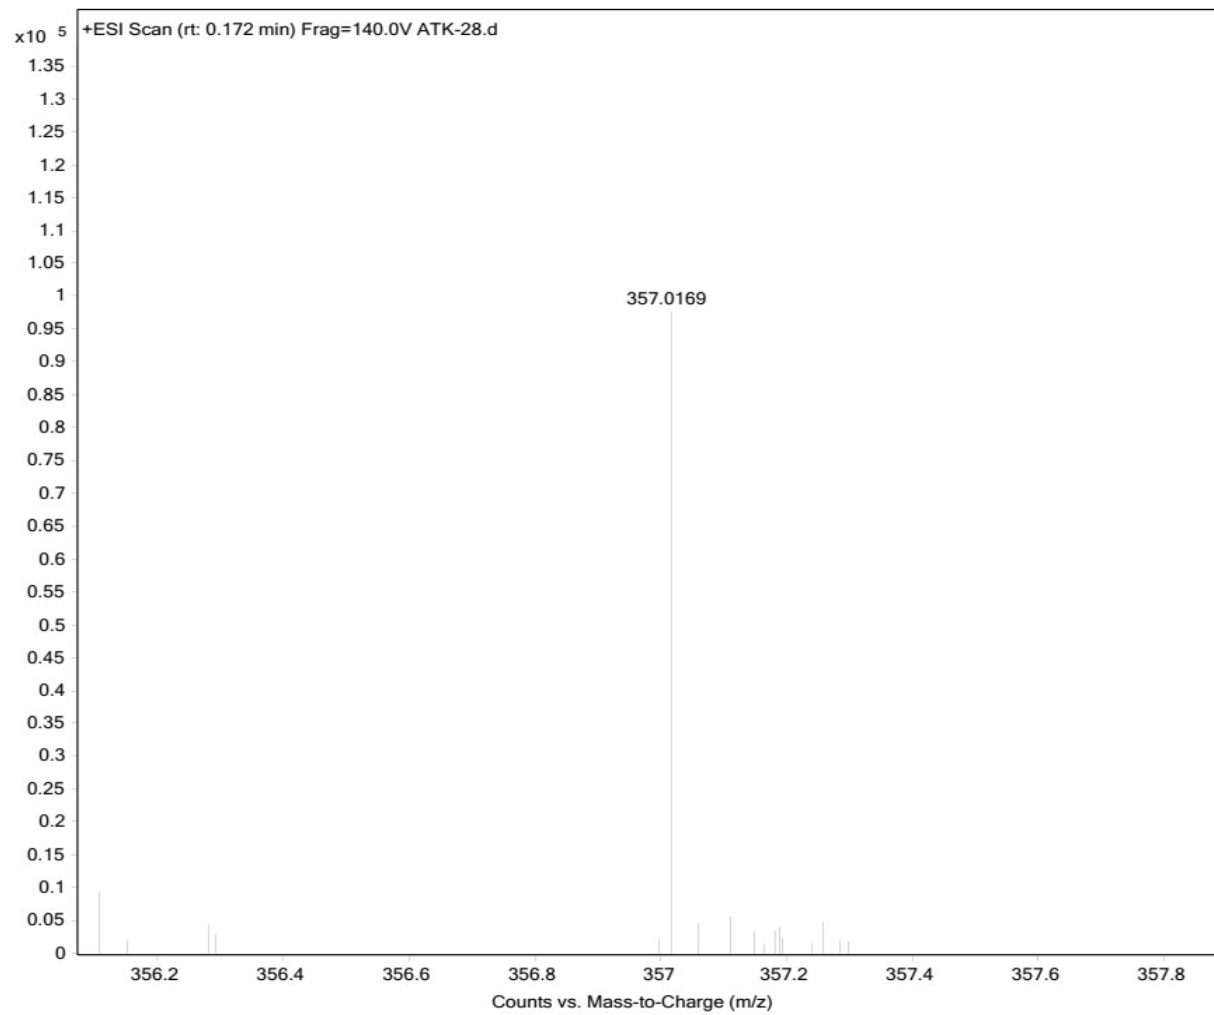

**<sup>1</sup>H NMR Compound (3v)**

ATK-AA-15-P2P-1H.1.f1  
ATK-AA-15-P2P-1H

8.53  
8.52  
8.52  
7.57  
7.56  
7.55  
7.55  
7.54  
7.53  
7.52  
7.52  
7.50  
7.50  
7.49  
7.48  
7.48  
7.45  
7.44  
7.43  
7.43  
7.32  
7.32  
7.30  
7.30  
7.28  
7.27  
7.26  
7.15  
7.14  
6.00  
5.99  
5.98  
5.97  
4.94  
4.94  
4.93  
4.93  
2.33

7.57  
7.56  
7.55  
7.55  
7.54  
7.53  
7.52  
7.52  
7.50  
7.50  
7.49  
7.48  
7.45  
7.44  
7.43  
7.43  
7.32  
7.32  
7.30  
7.30  
7.28  
7.27  
7.26  
7.15  
7.14

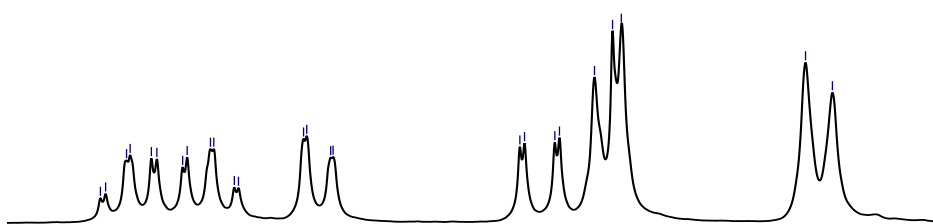

7.60 7.55 7.50 7.45 7.40 7.35 7.30 7.25 7.20 7.15 7.10

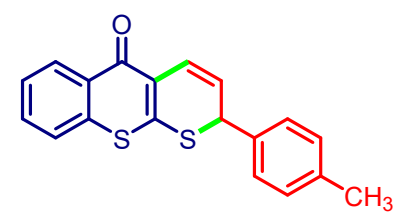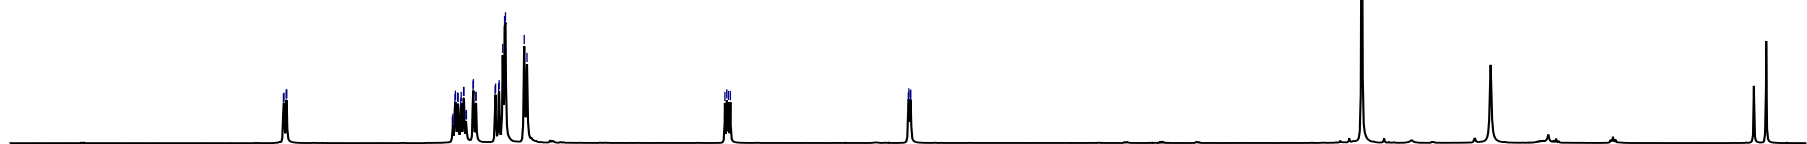

1.00  
2.39  
0.95  
3.03  
1.98  
1.14  
1.06  
3.48

10.0 9.5 9.0 8.5 8.0 7.5 7.0 6.5 6.0 5.5 5.0 4.5 4.0 3.5 3.0 2.5 2.0 1.5 1.0 0.5 0.0

**<sup>13</sup>C NMR Compound (3v)**

ATK-AA-15-P29-13C.3.fid  
ATK-AA-15-P29-13C

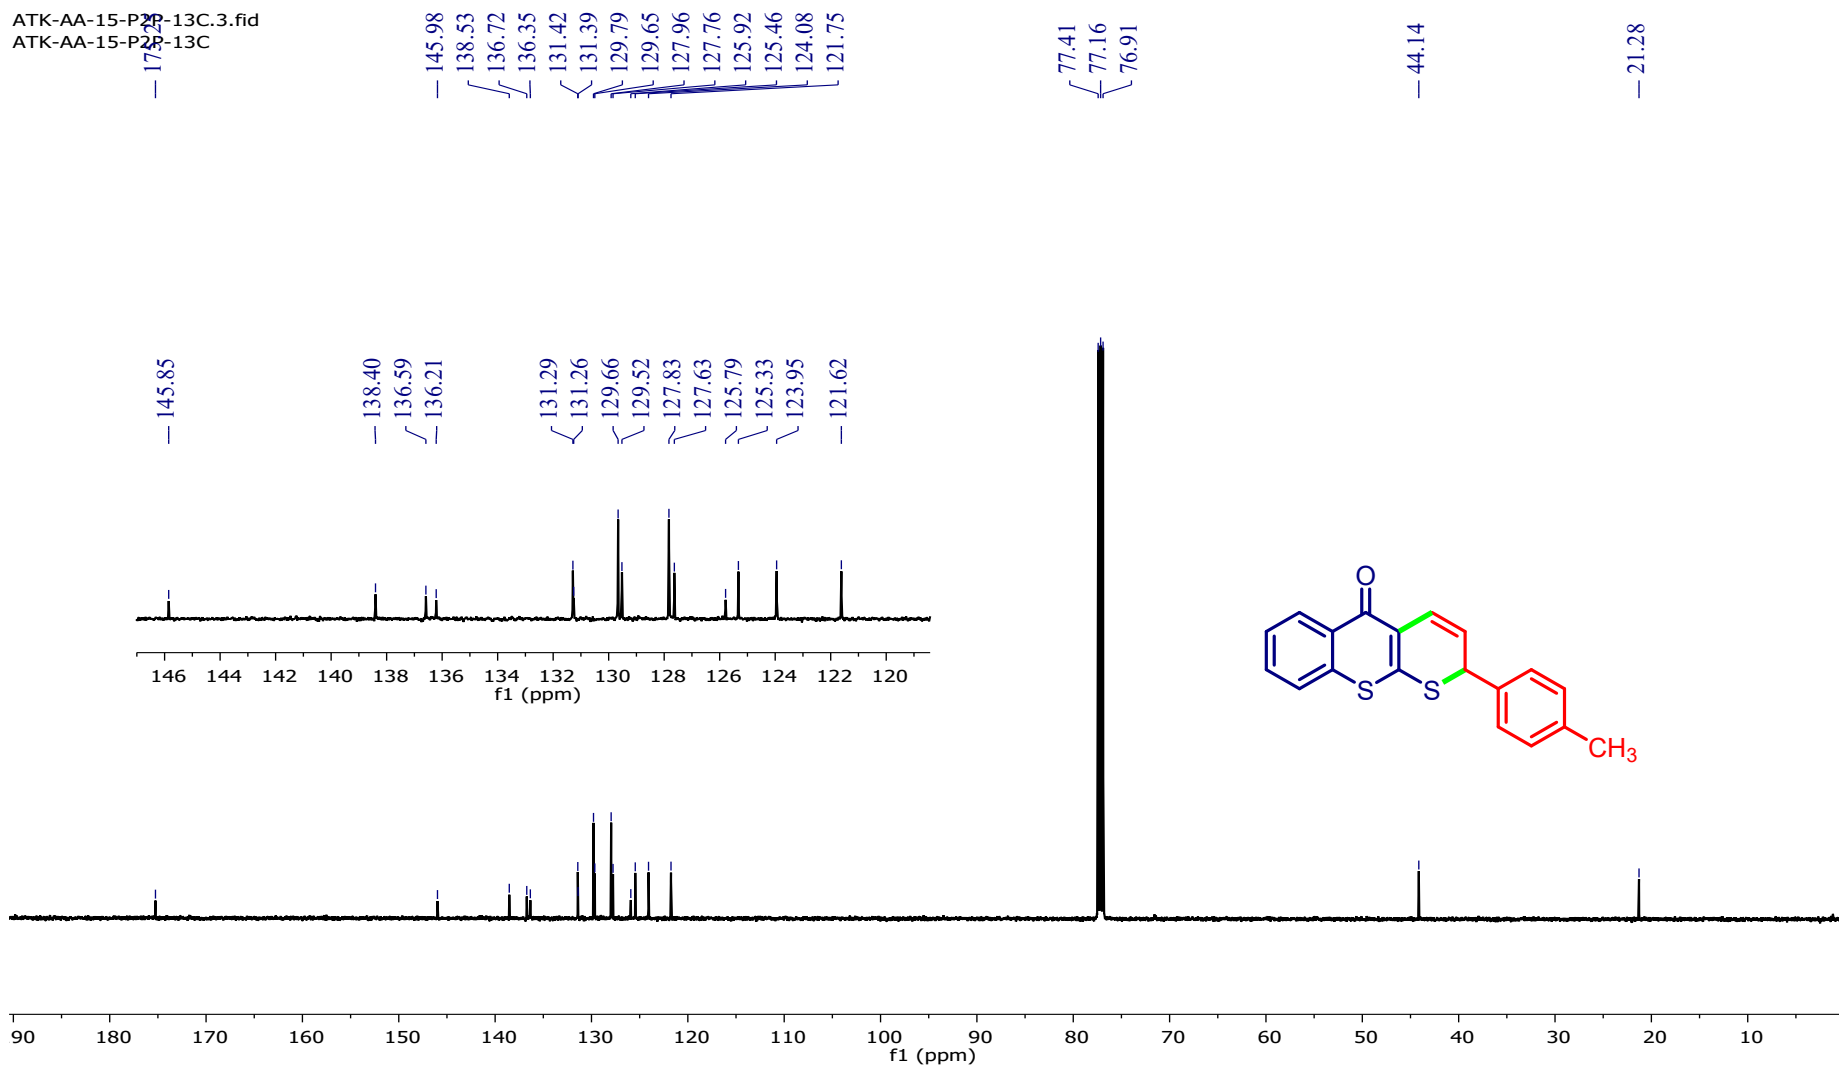

HRMS (3v)

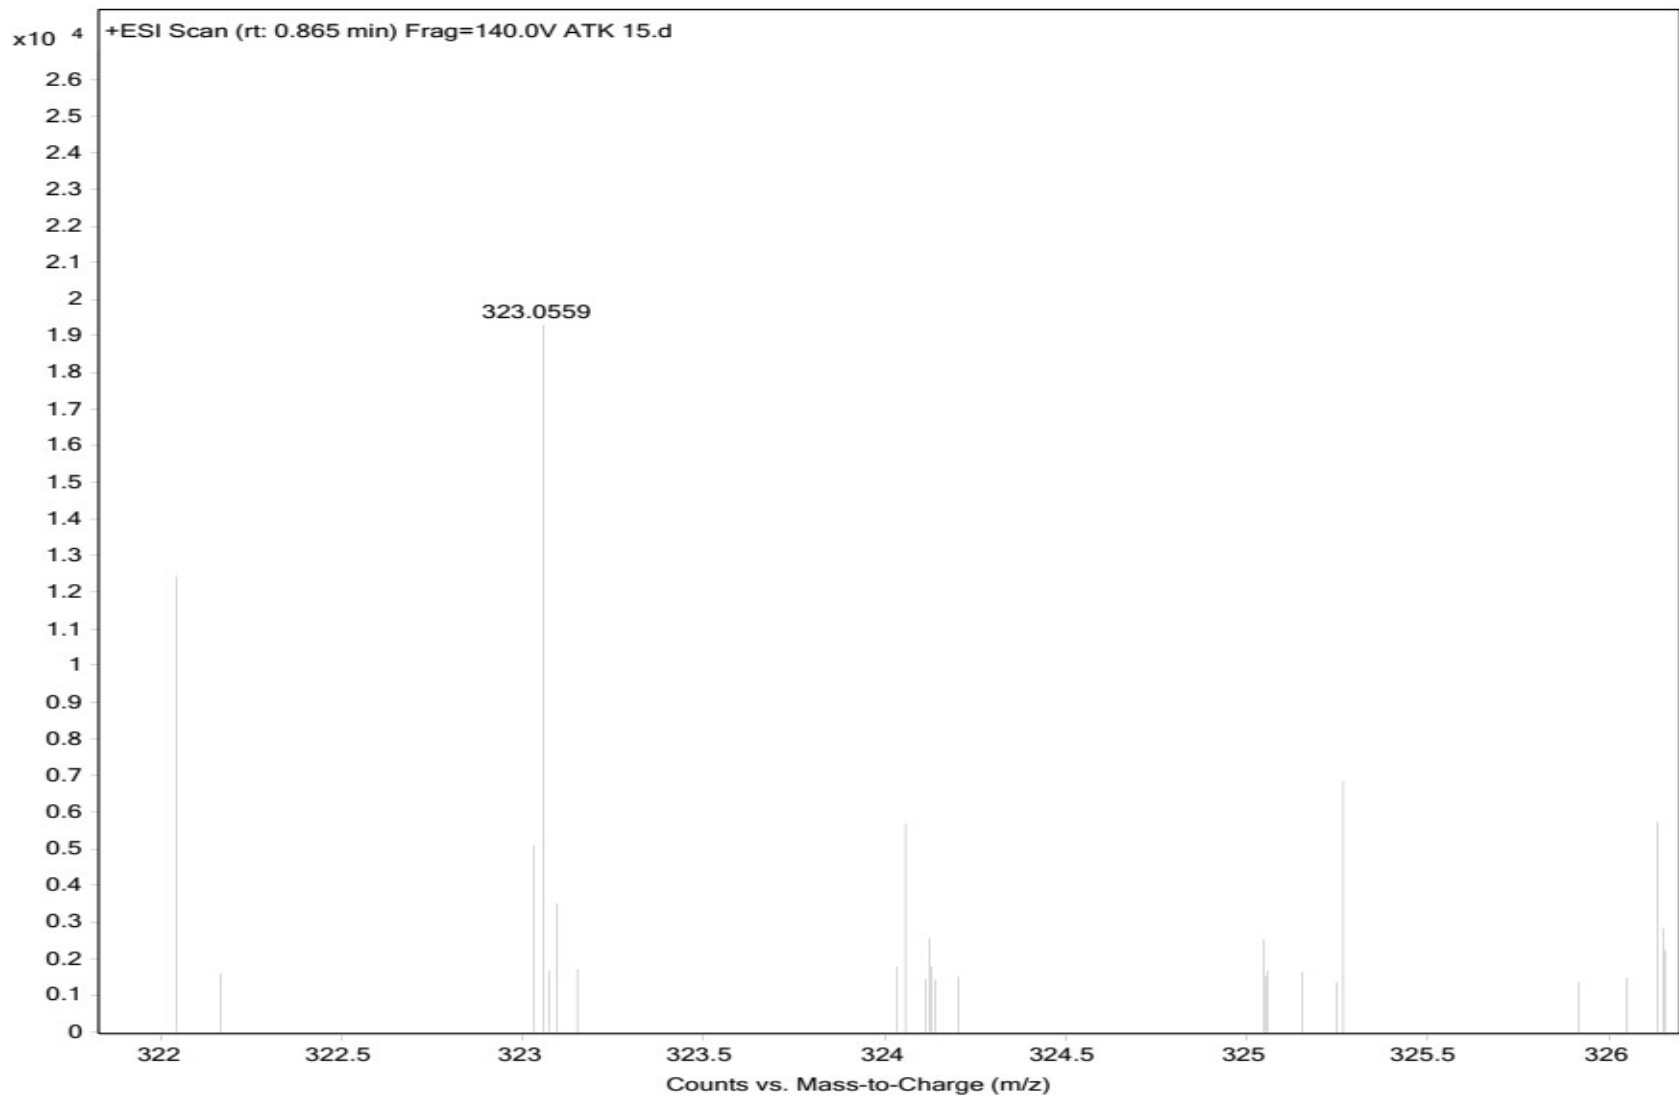

### <sup>1</sup>H NMR of compound (3w)

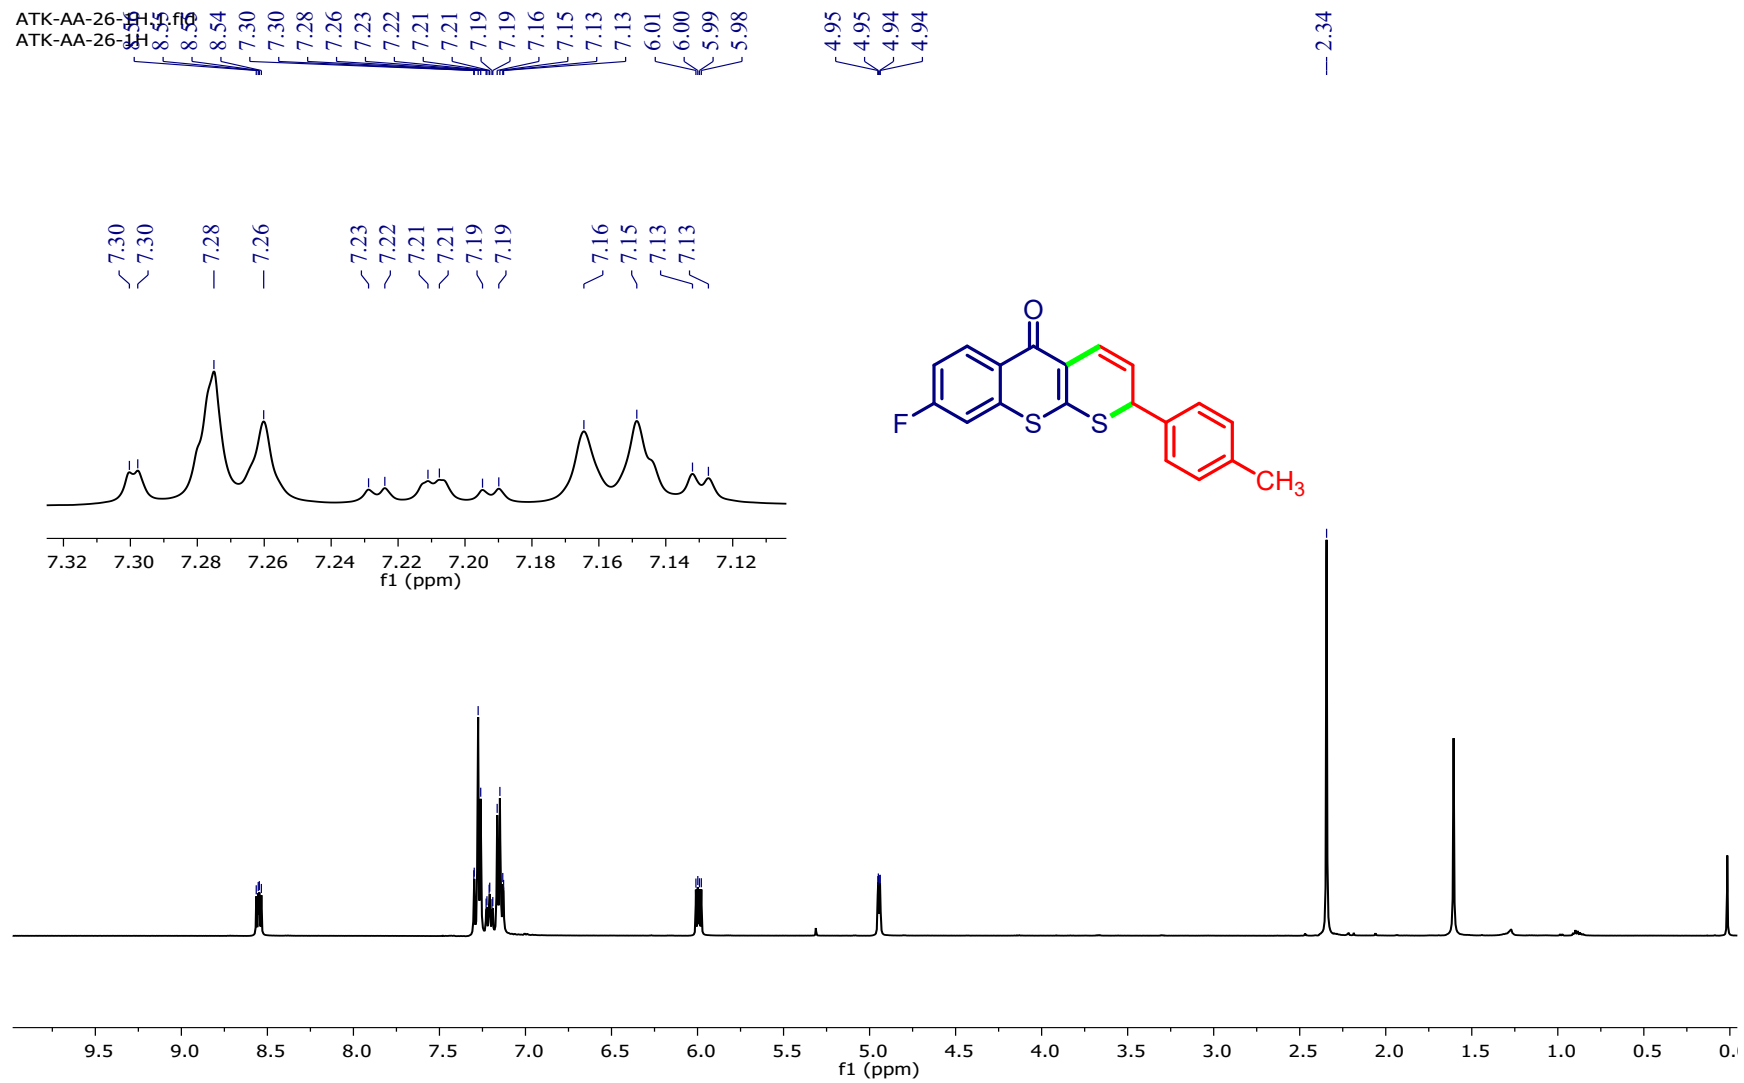

### <sup>13</sup>C NMR of compound (3w)

ATK-AA-26-1303.fid  
ATK-AA-26-1303

174.40  
165.03  
163.00

145.46  
138.63  
138.39  
138.31  
136.52  
132.76  
132.68  
129.82  
128.02  
127.95  
125.91  
123.92  
121.94  
116.34  
116.16  
111.57  
111.38

77.41  
77.16  
76.91

44.14

21.28

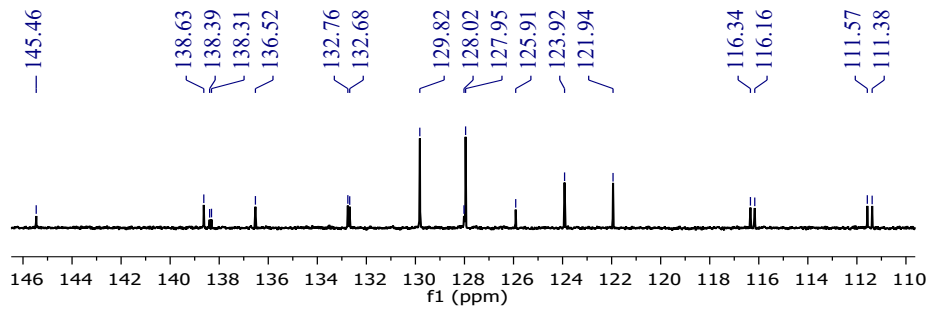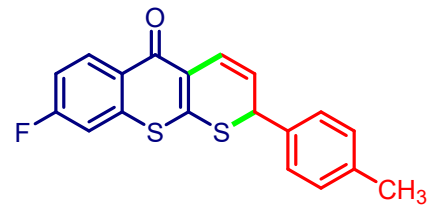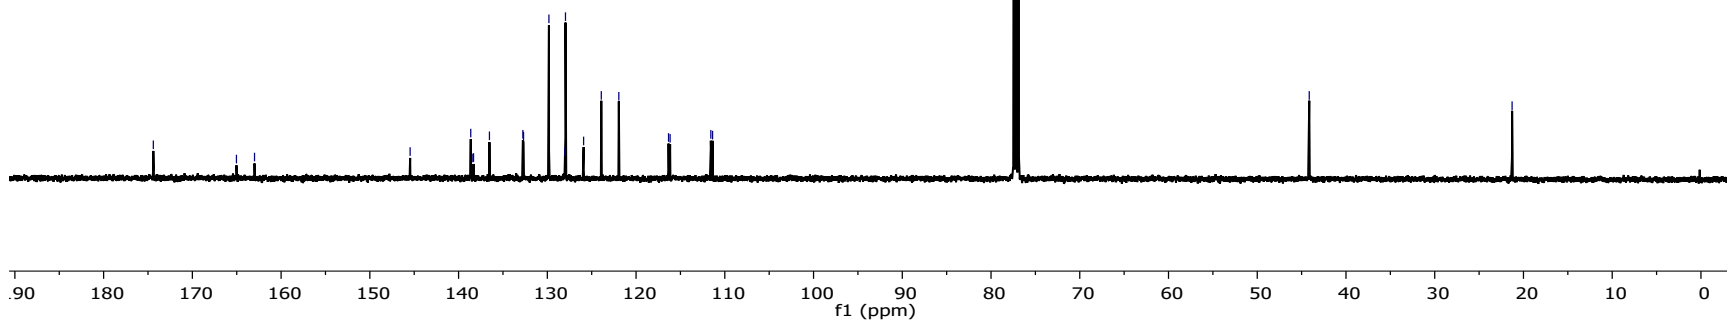

HRMS 3w

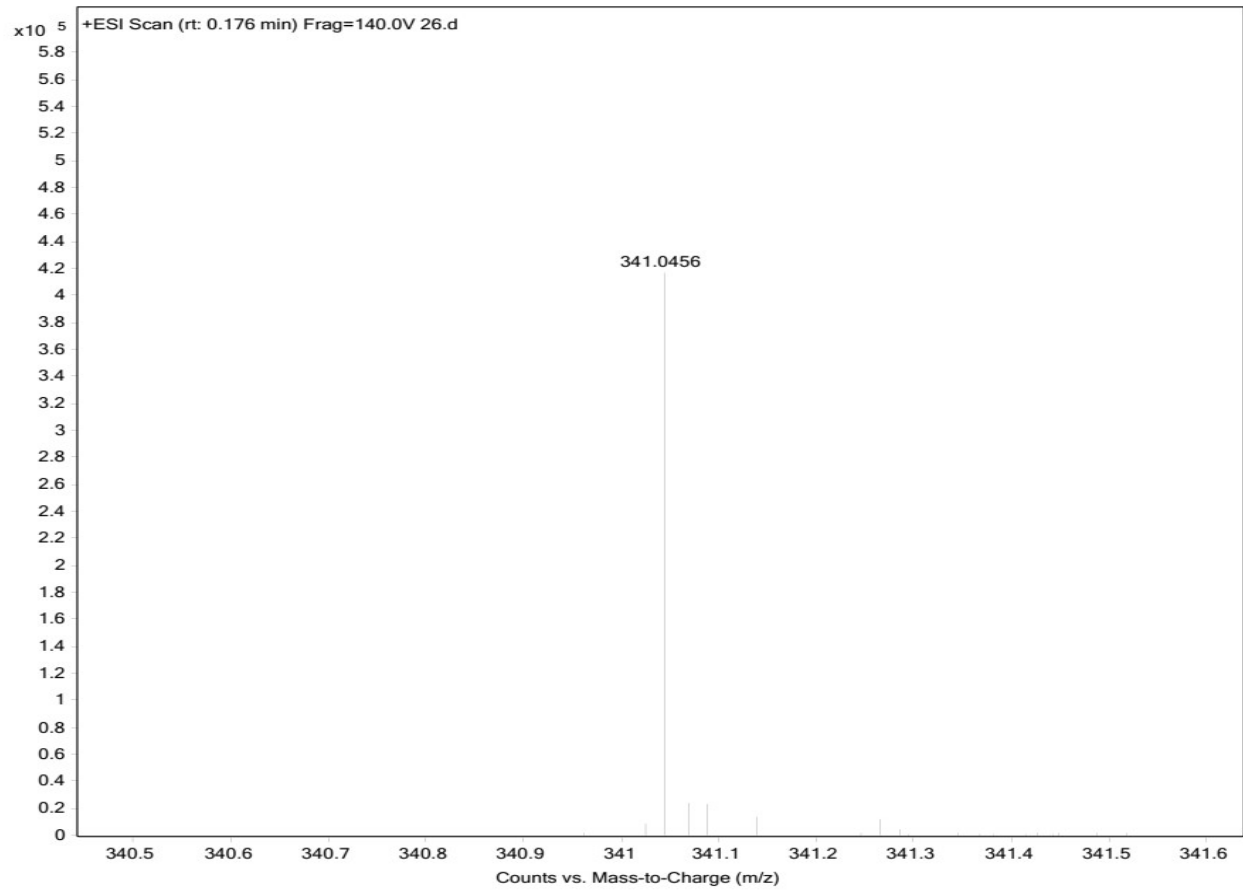



ATK-AA20-1H.3.fid  
ATK-AA20-1H

### <sup>1</sup>H NMR Compound (3x)

8.44  
8.42  
7.43  
7.42  
7.26  
7.25  
7.24  
7.24  
7.22  
7.21  
7.17  
7.15  
7.12  
7.11

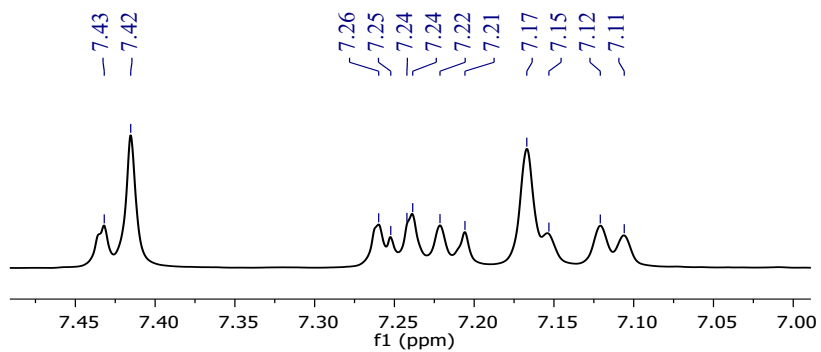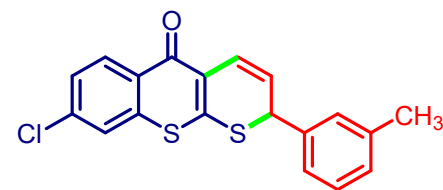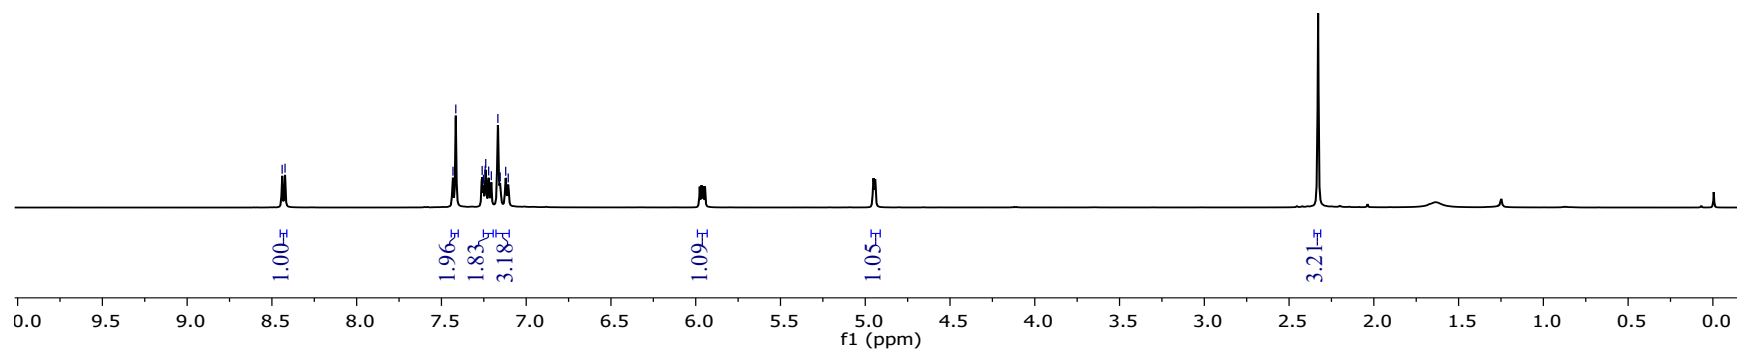

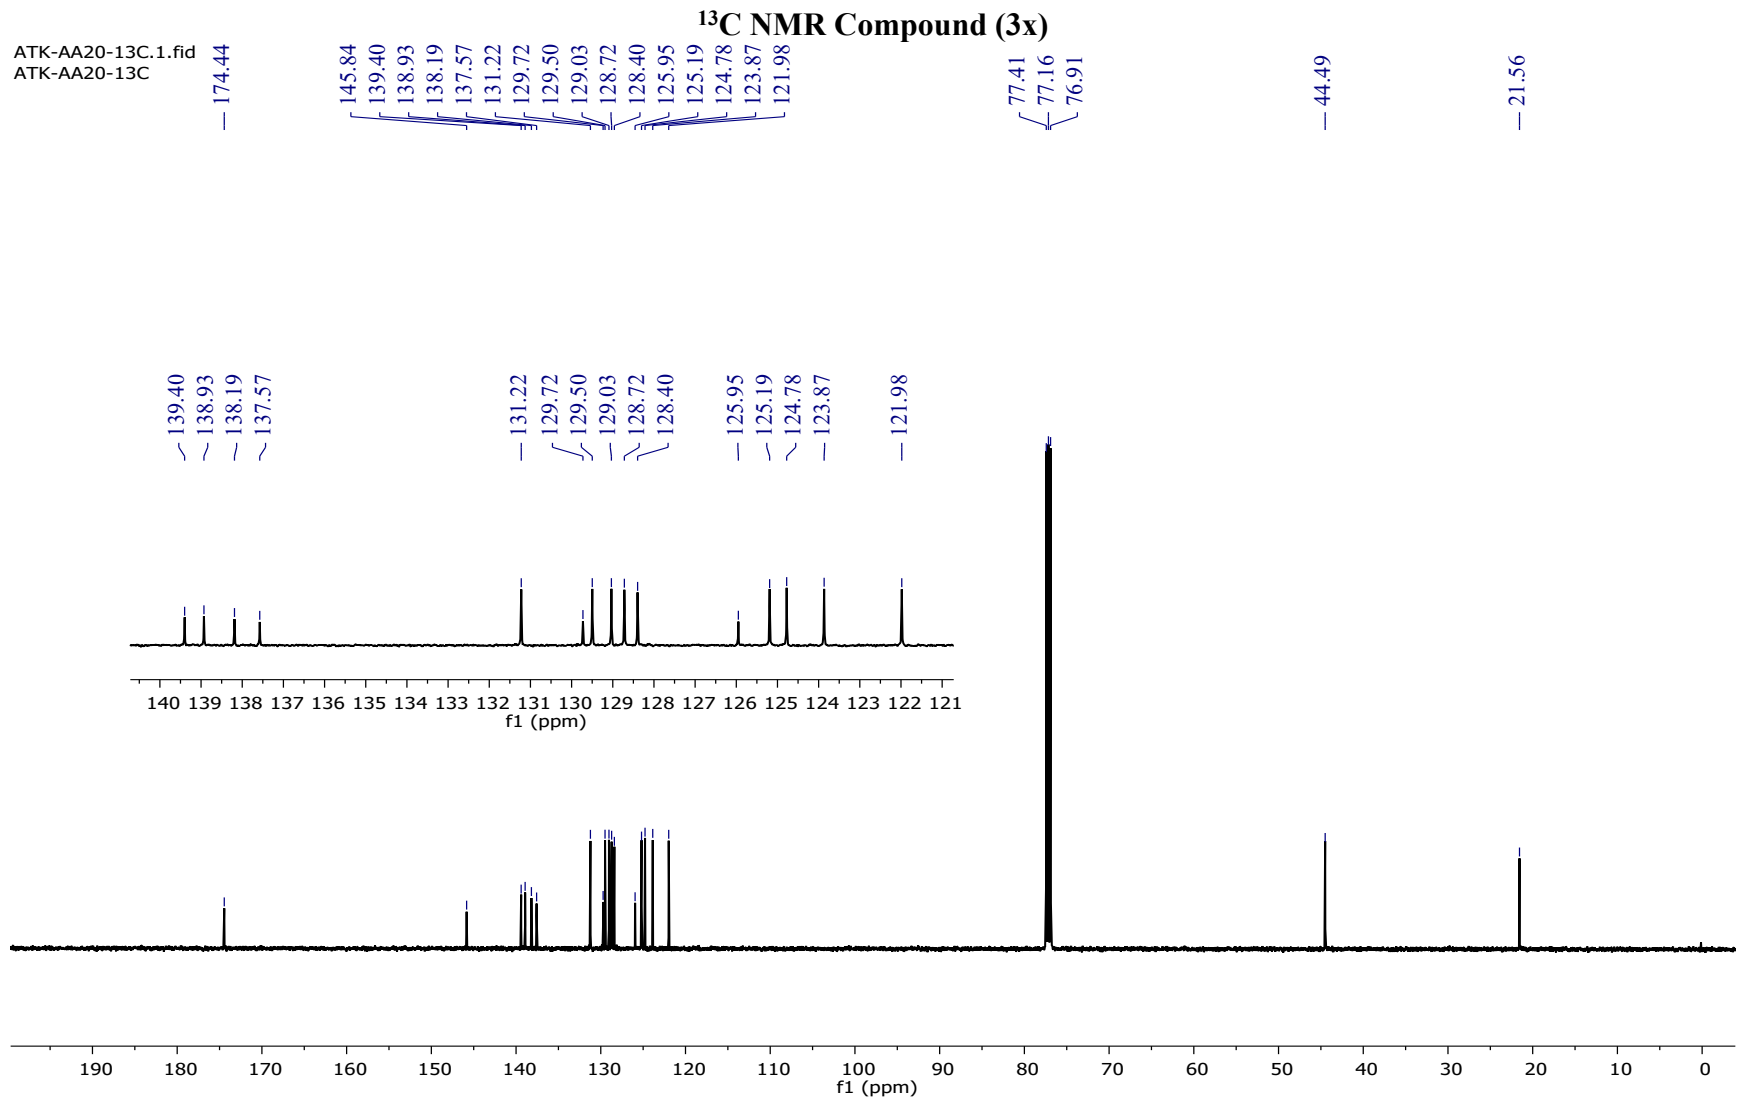

### HRMS of compound (3x)

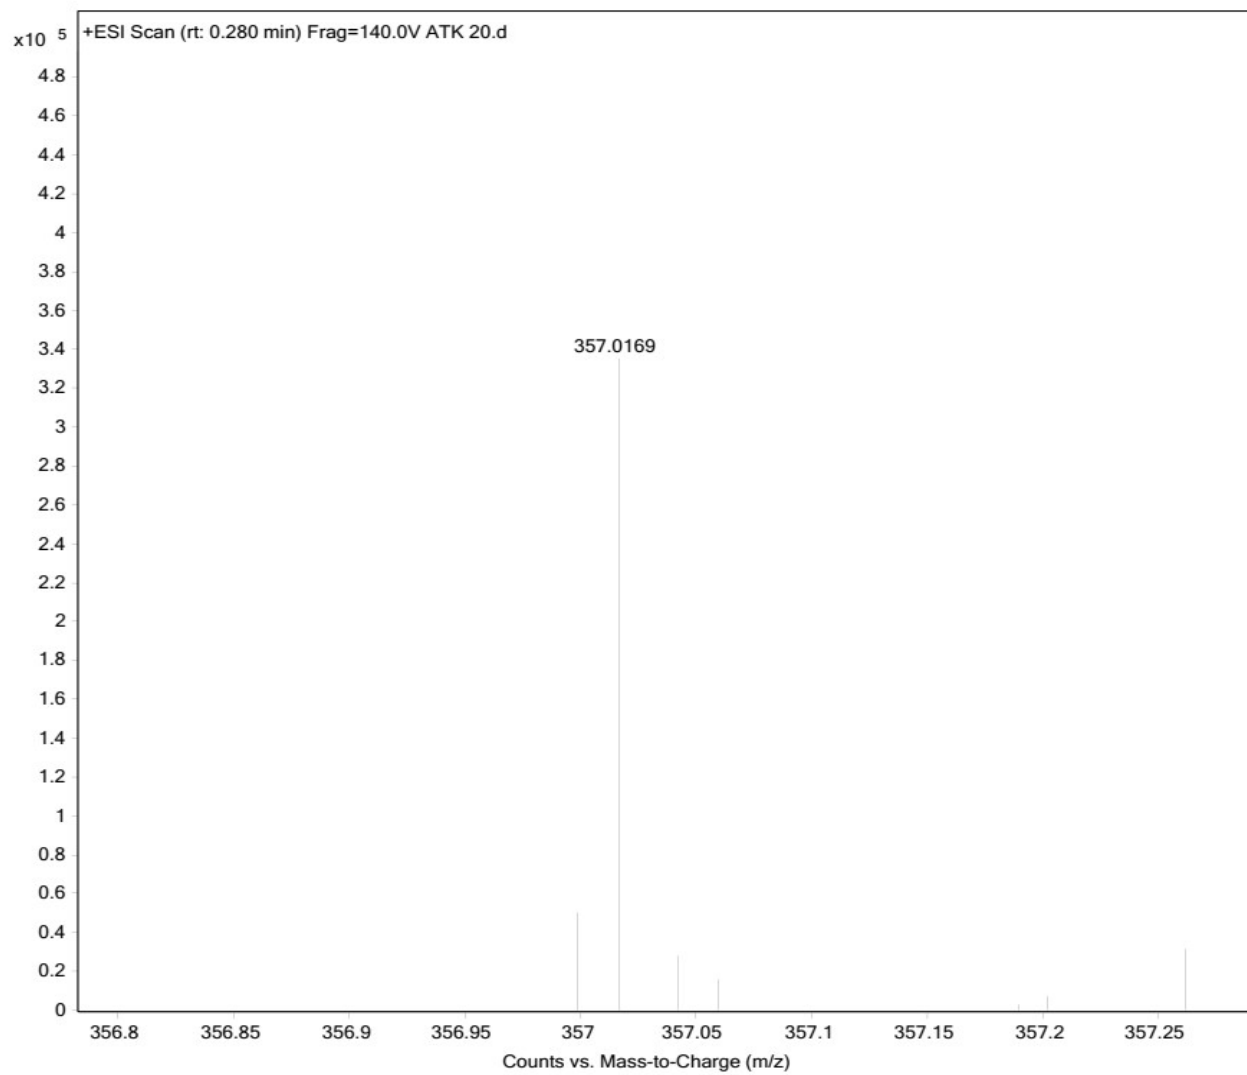

# <sup>1</sup>H NMR of compound (3y)

ATK-AA-M-CH3-1H.1.fid — ATK-AA-M-CH3-1H

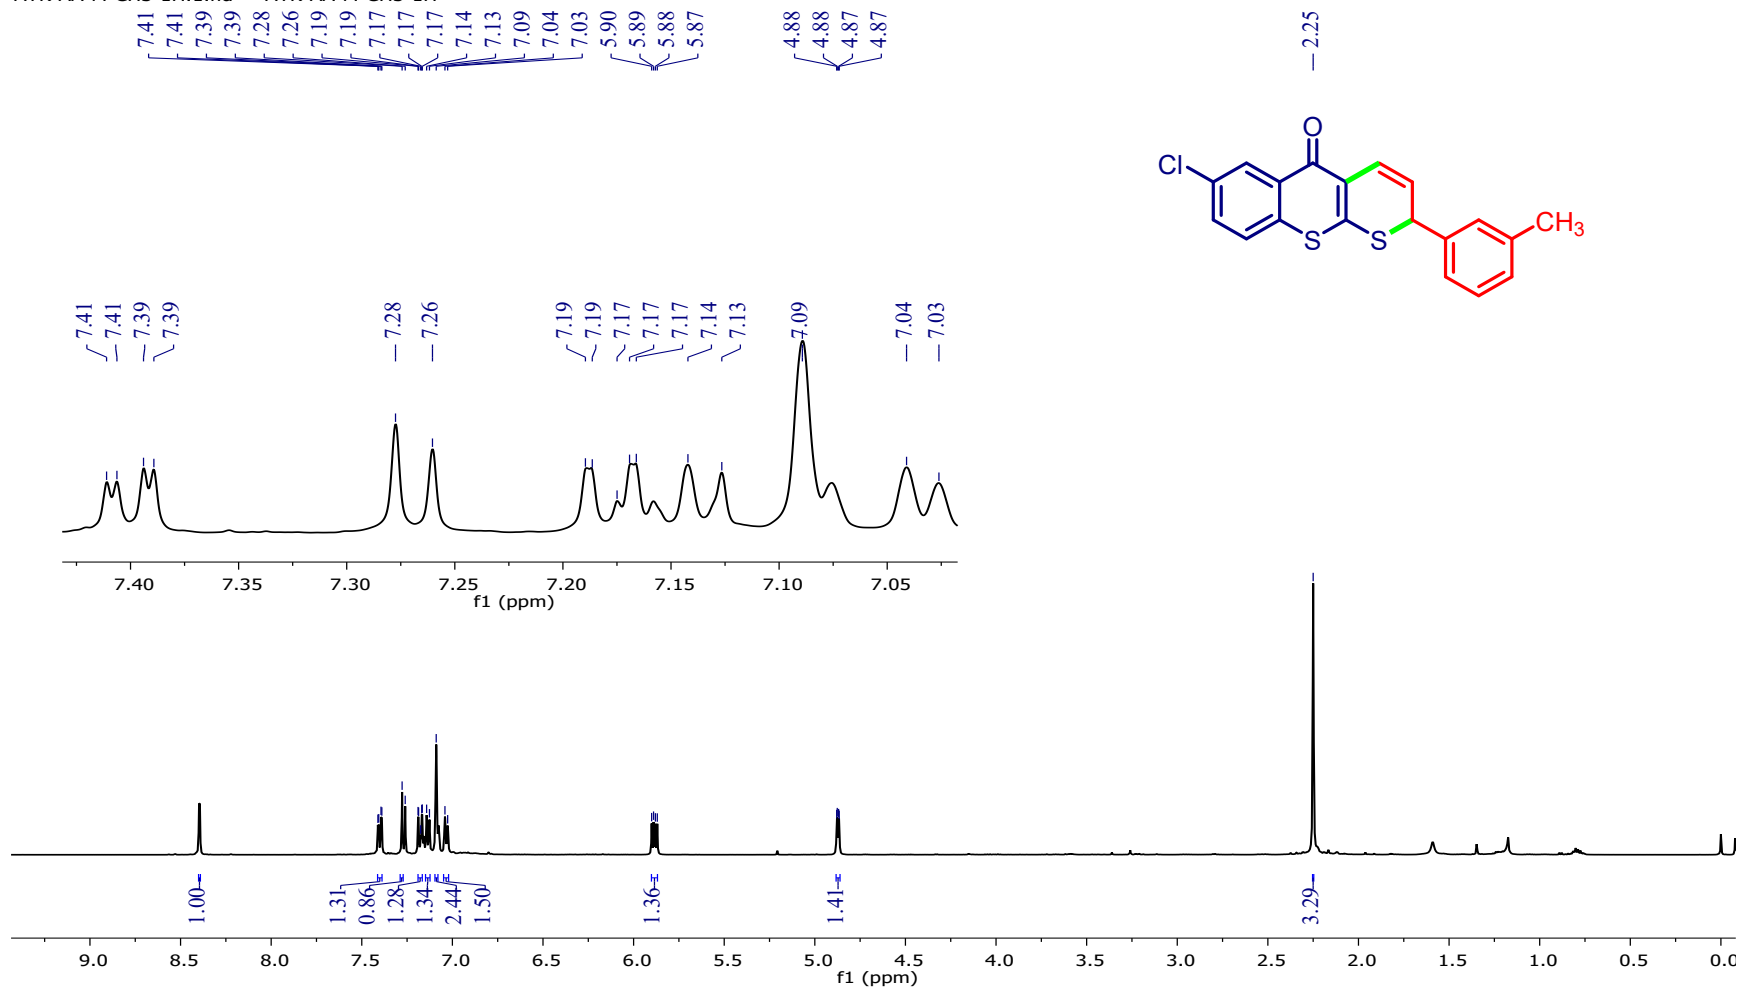

### <sup>13</sup>C NMR of compound (3y)

ATK-AA-M-CH3-13C.39d  
ATK-AA-M-CH3-13C

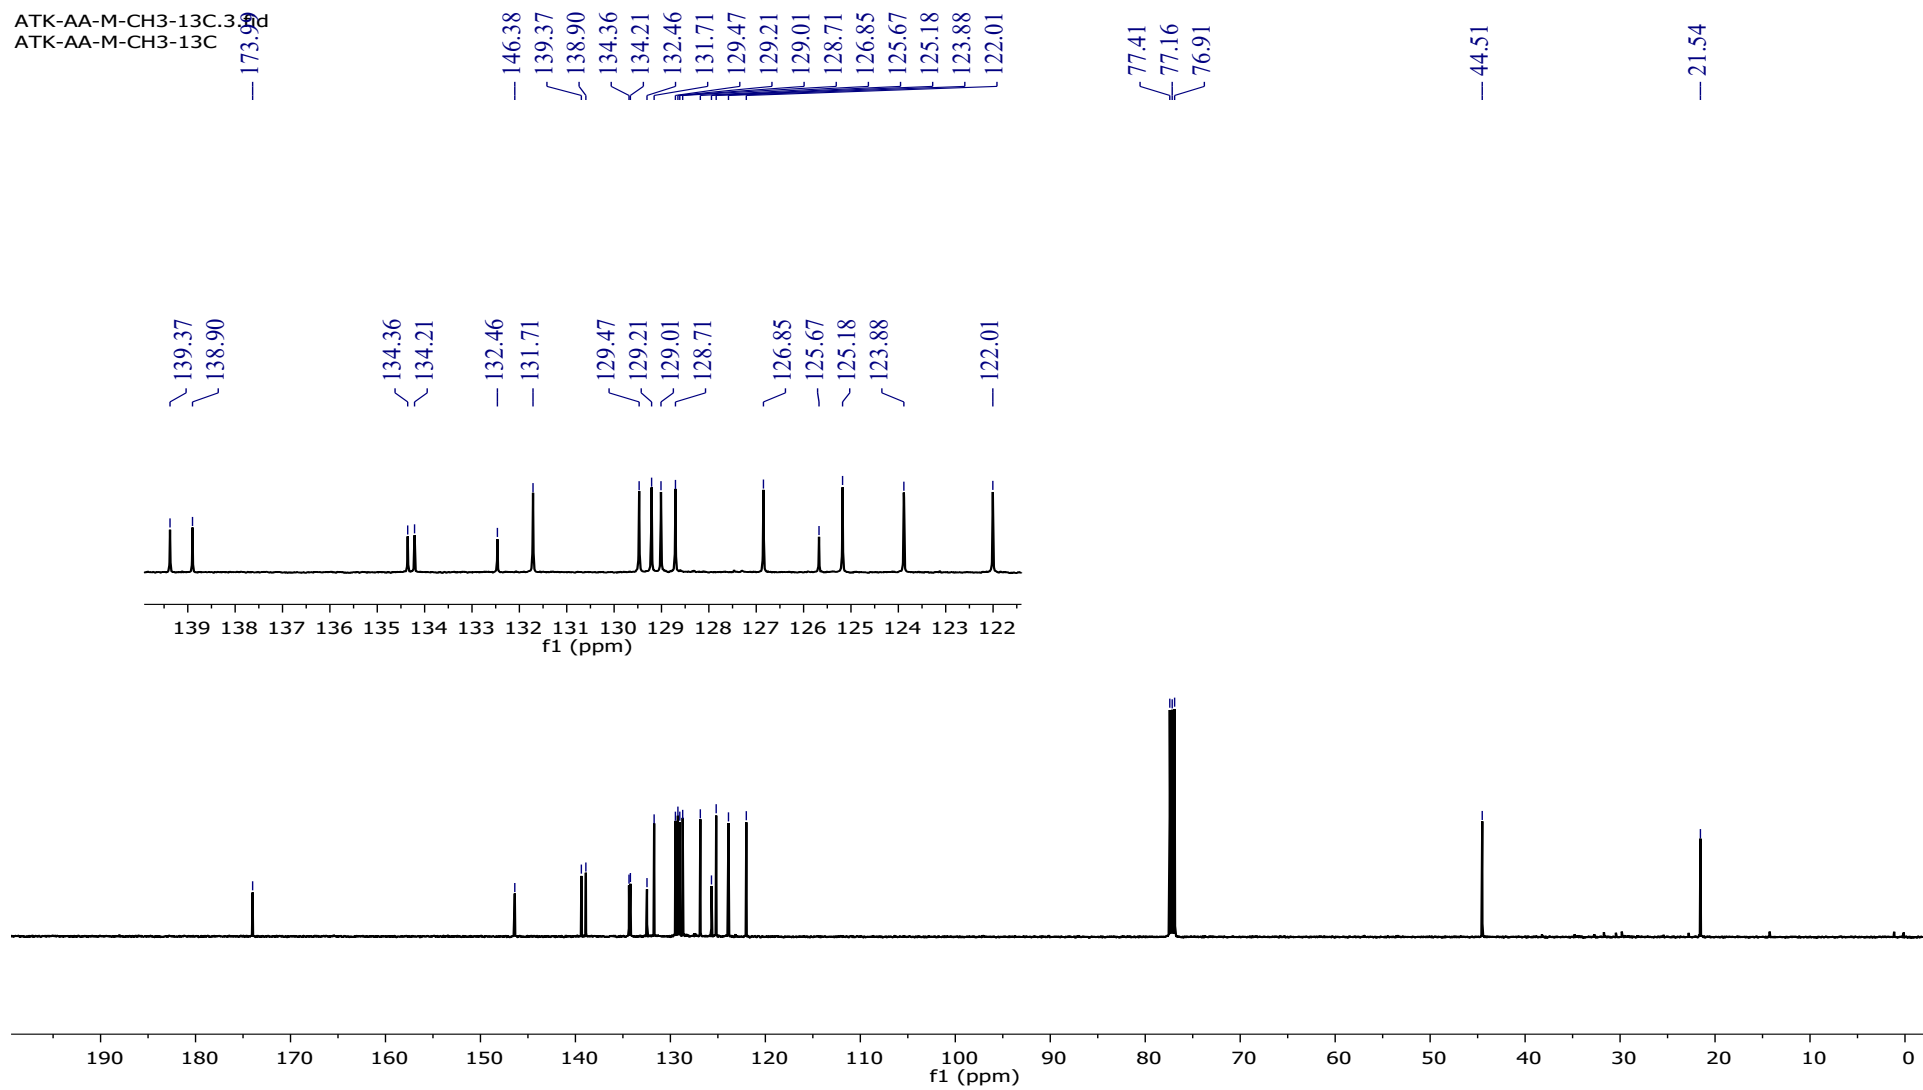

### HRMS of compound (3y)

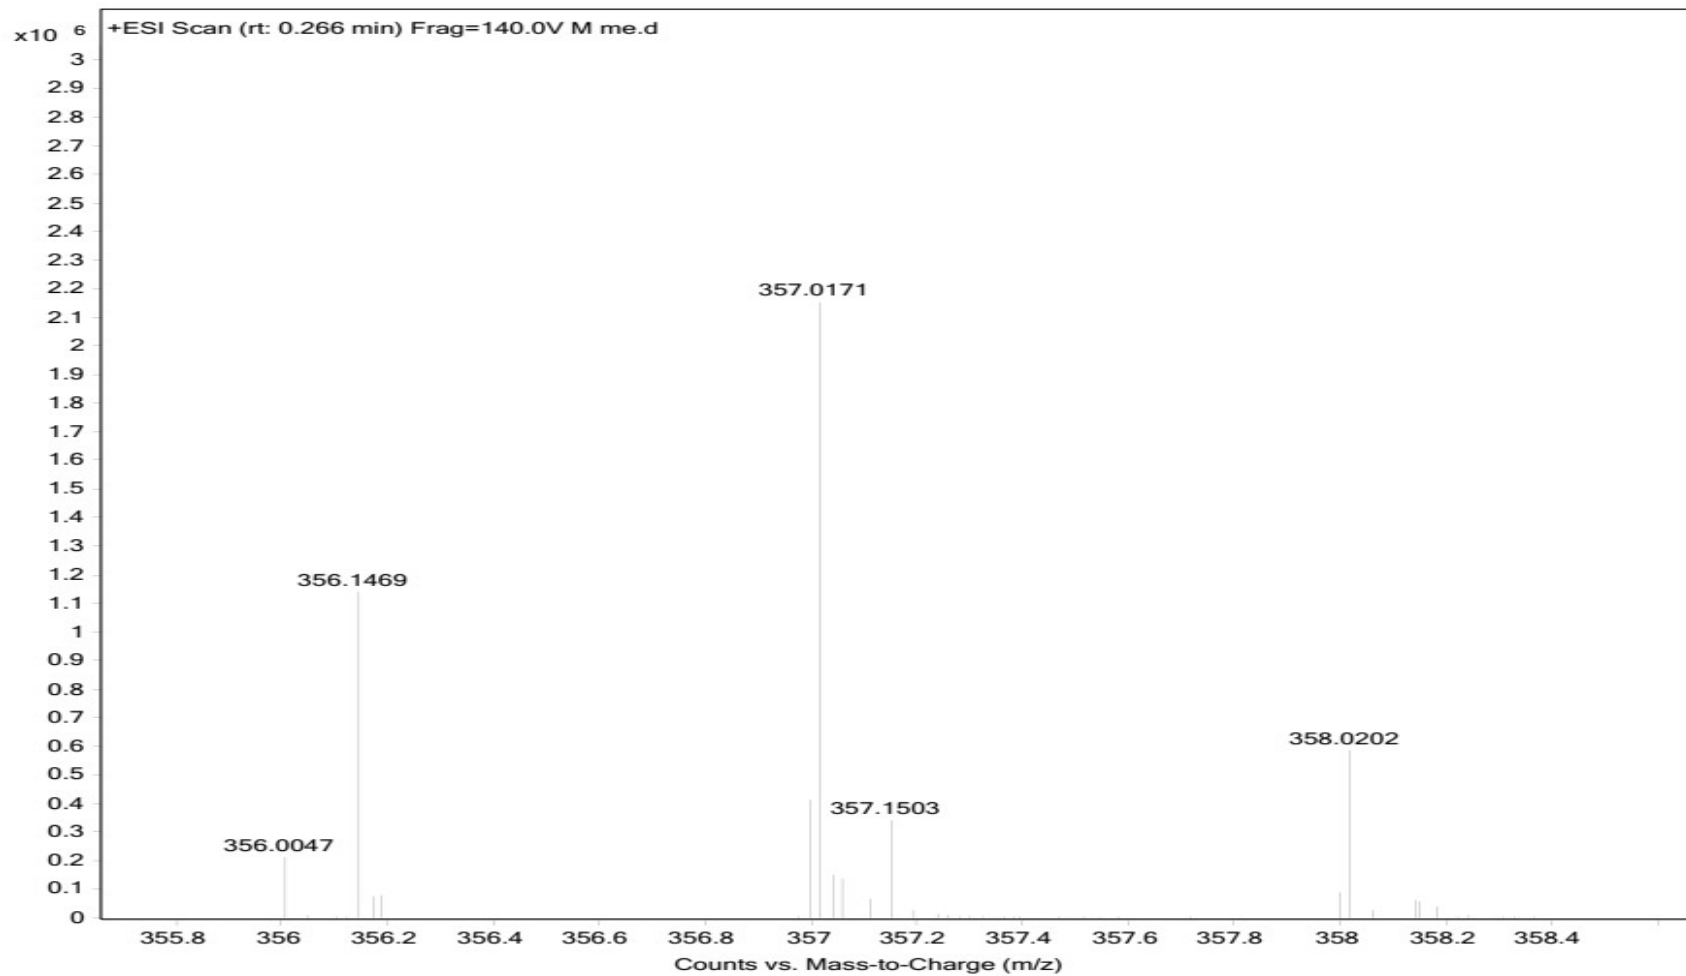

### <sup>1</sup>H NMR of compound (3z)

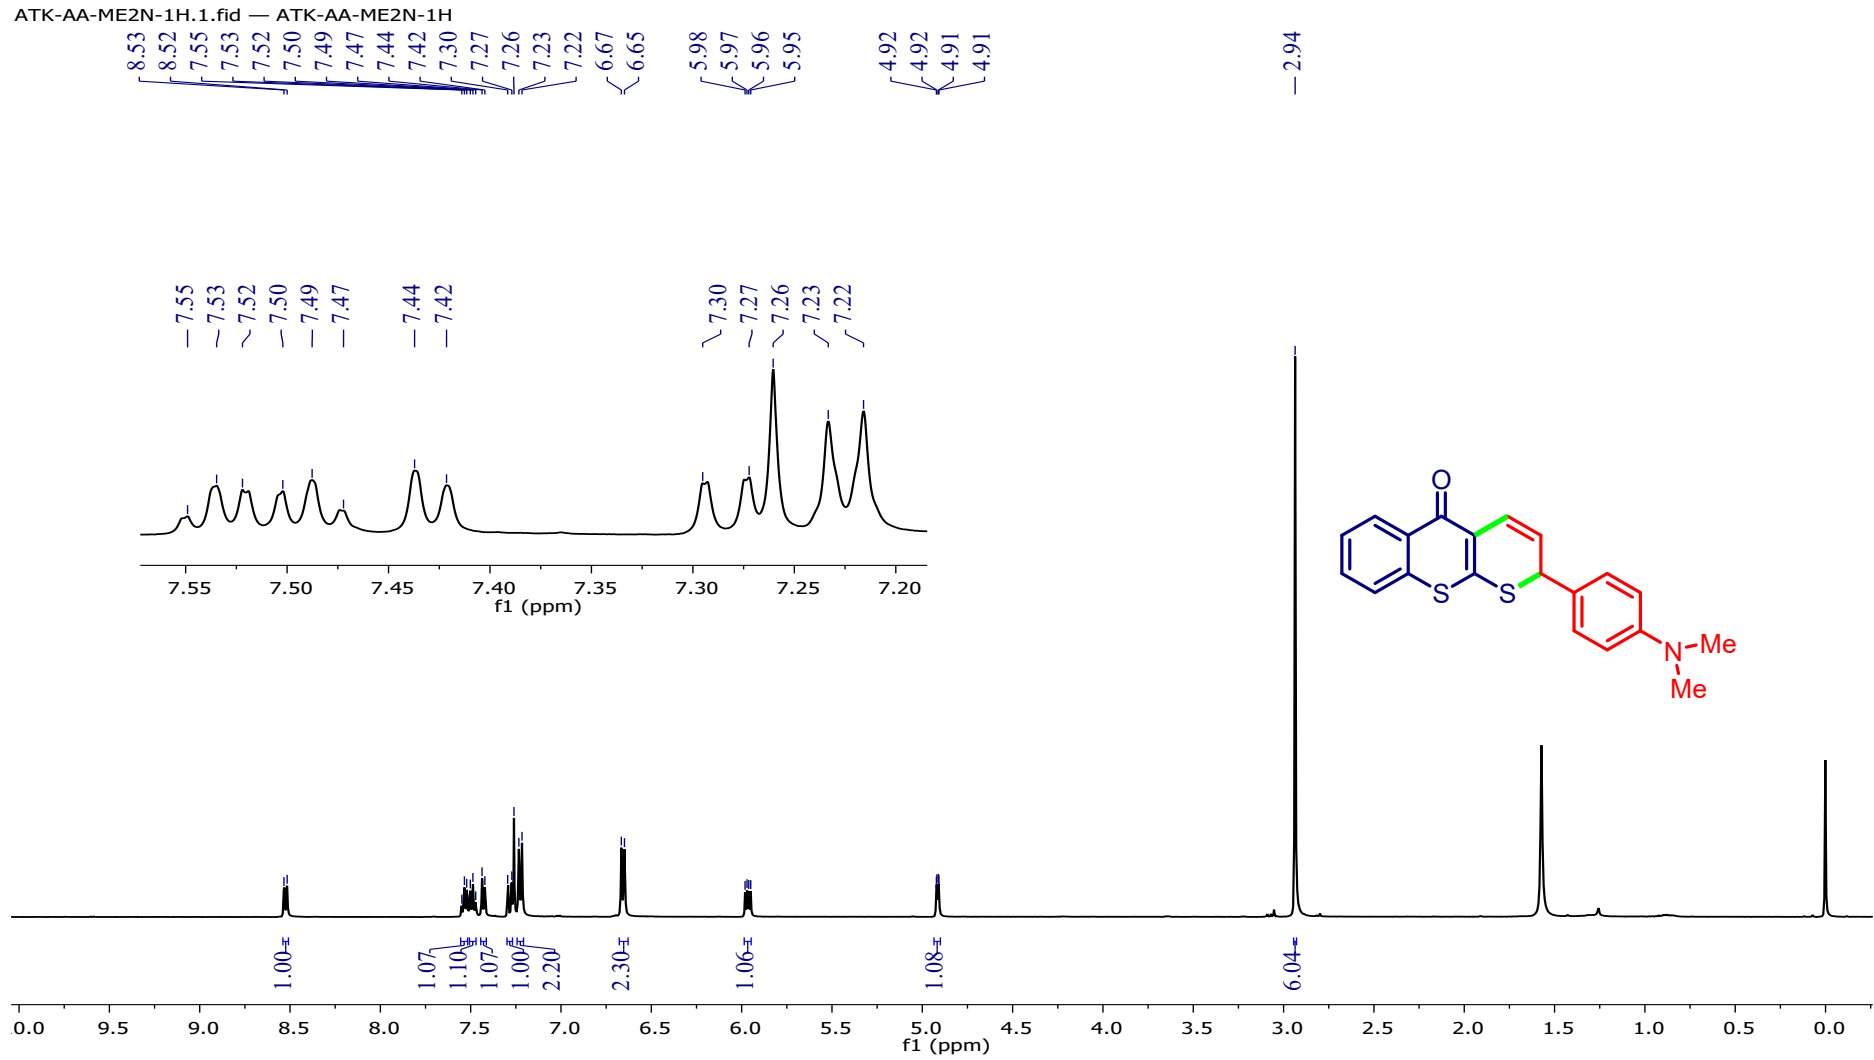

# <sup>13</sup>C NMR of compound (3z)

ATK-AA-ME2N13C.3.fid  
ATK-AA-ME2N13C

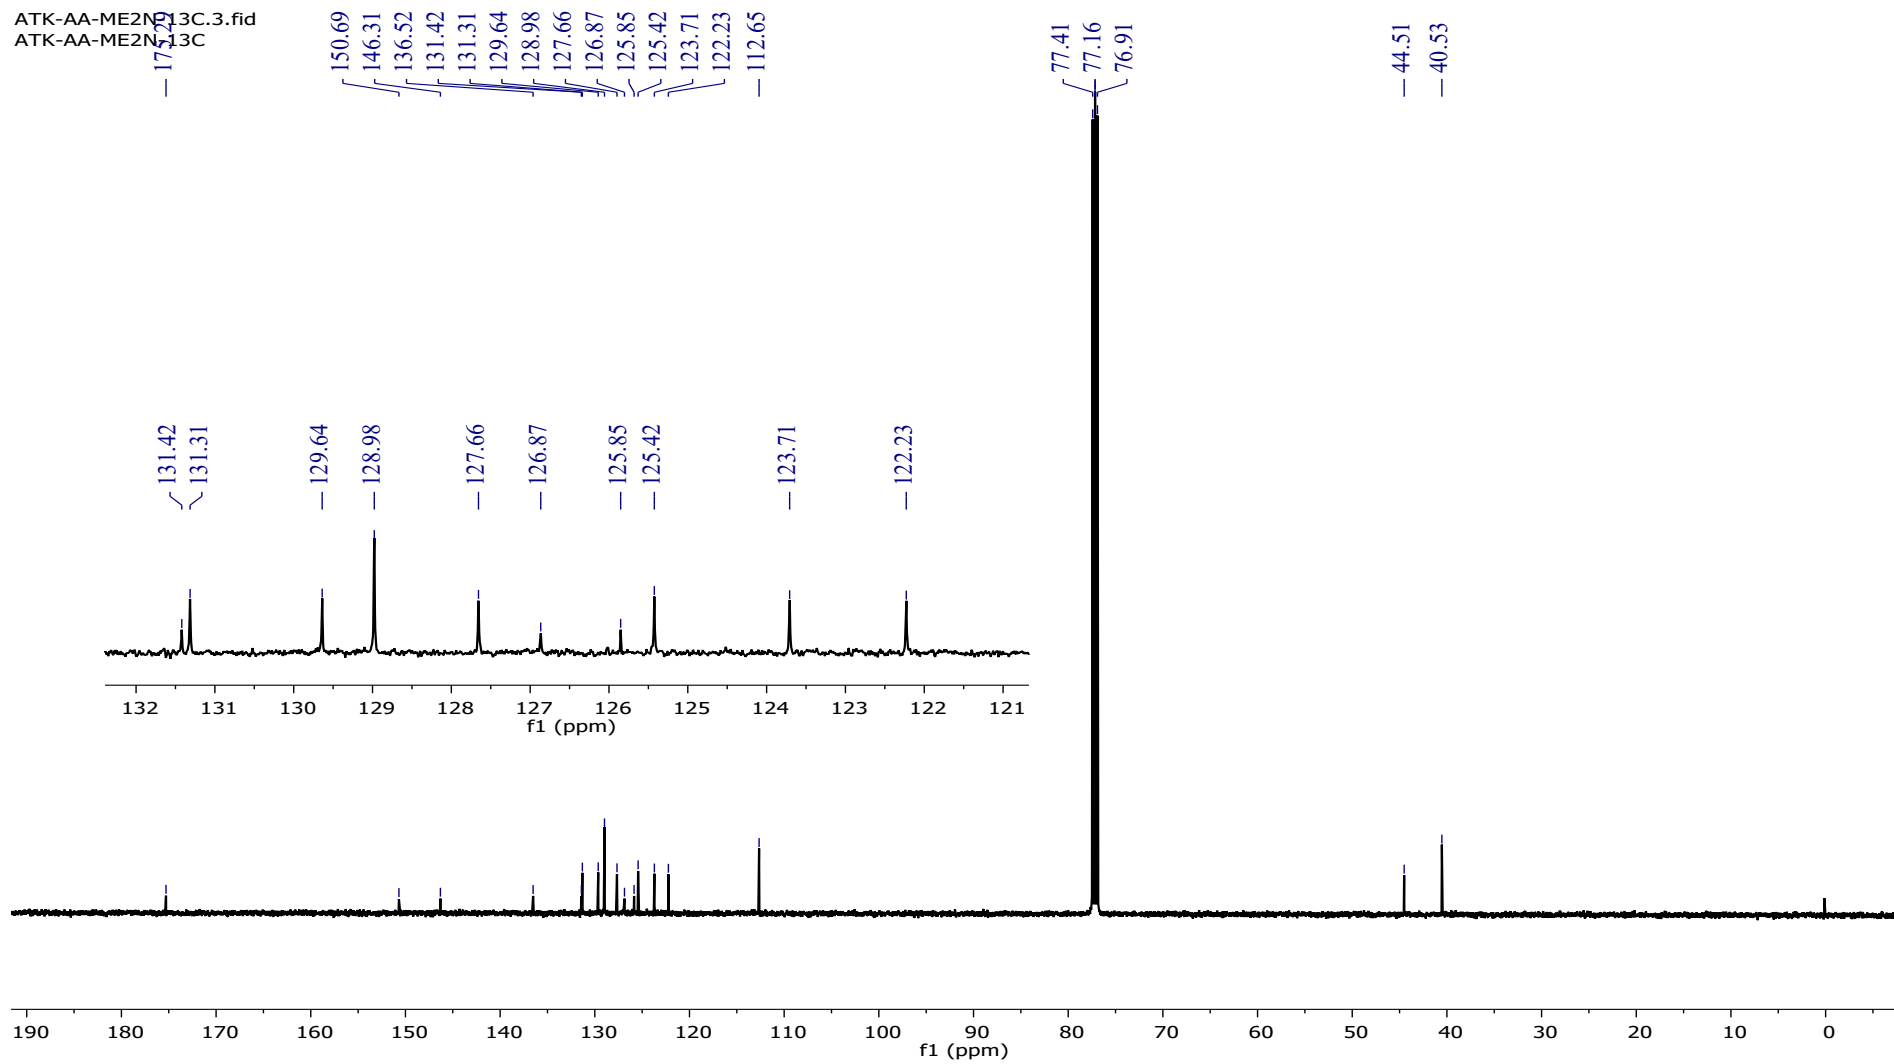



**HRMS of compound (3z)**

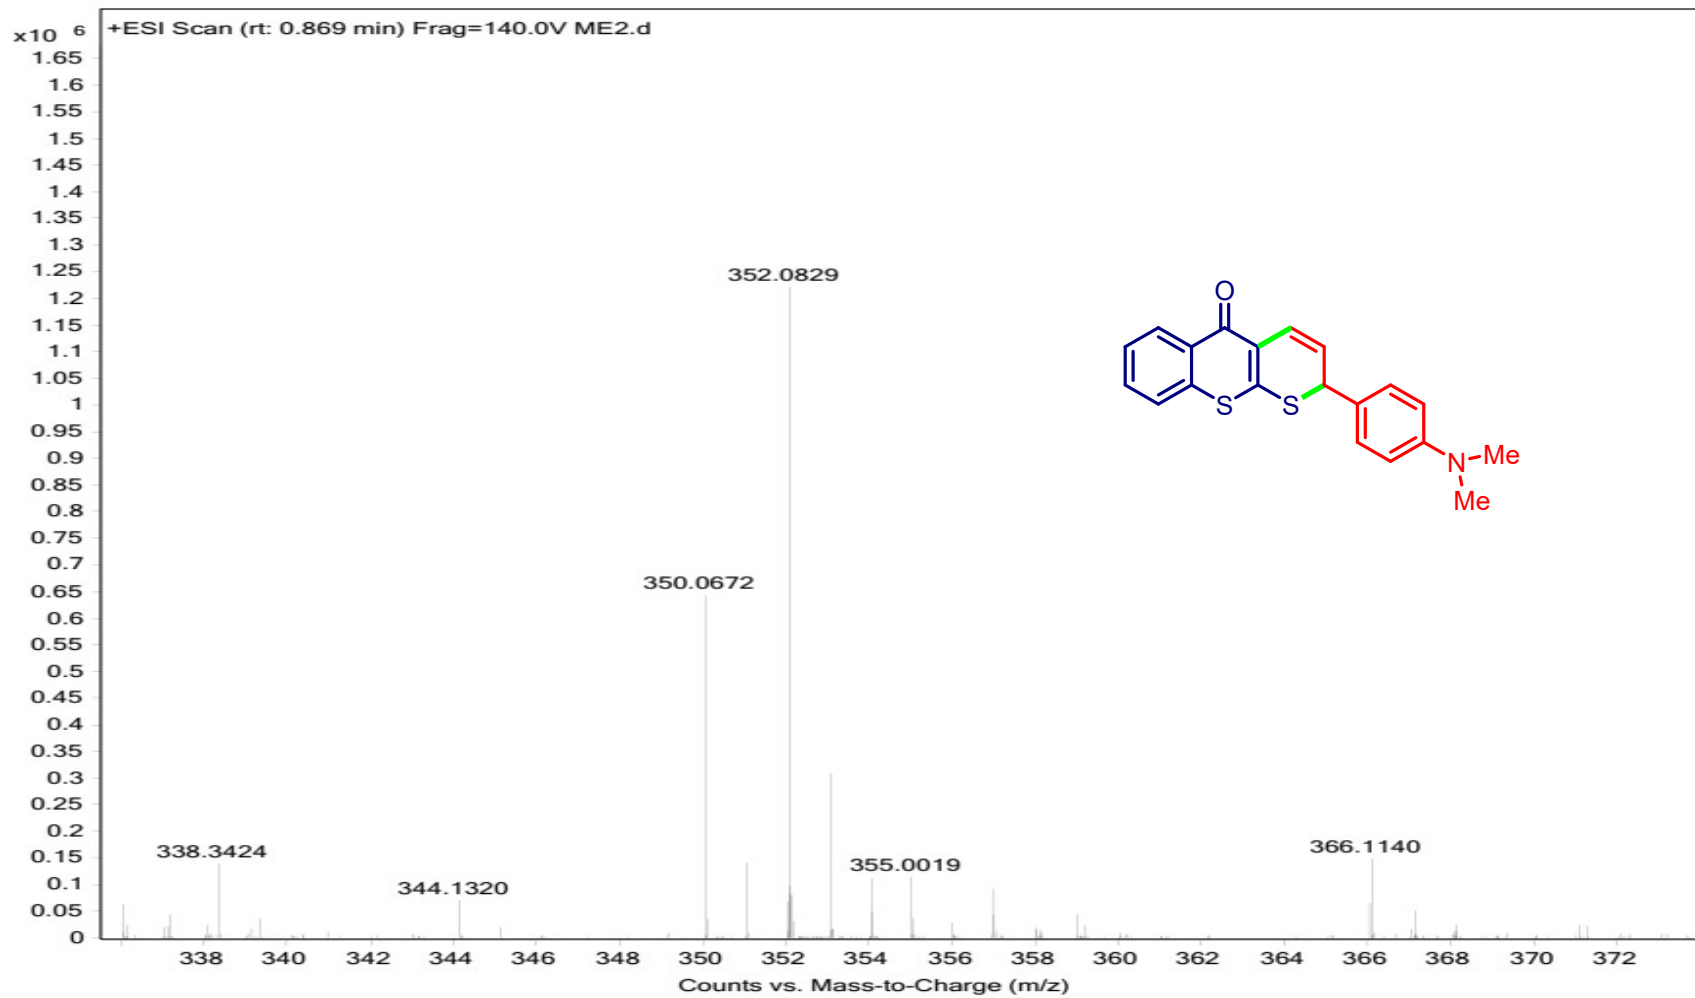

## 6. HRMS of intermediate (A1)

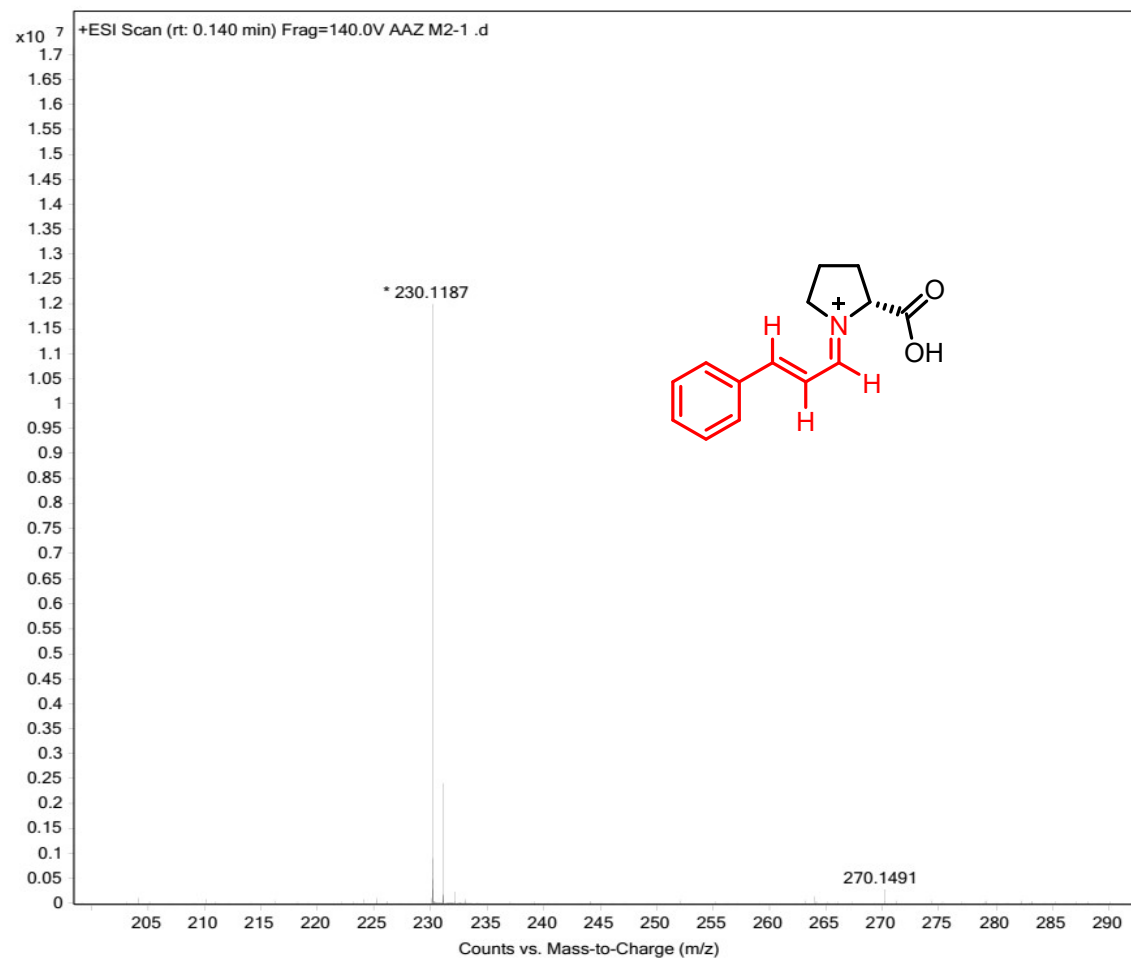

Expected  $m/z$  calculated for  $C_{14}H_{16}NO_2$  230.1176( $M + H^+$ ); **Found** 230.1187.
